# Supplementary material for: Glutathione in the nucleus accumbens regulates motivation to exert reward-incentivized effort
Source: eLife. 2022 Nov 8;11:e77791. doi: 10.7554/eLife.77791 (PMC9642999; doi:10.7554/eLife.77791)
Supplement: Figure 1—source data 1. [file elife-77791-fig1-data1.xlsx]

## Sheet: Figure1b-c, Figure 1-suppl 1b-d
Figure 1b, c and Figure 1-figure supplement 1b-d
Performance values (H1 and H2)				Spectroscopy raw data							Spectroscopy principal components							Occipital lobe (OL) control values
Successful trials (all rewards)	Successful trials (1 CHF)	Successful trials (0.5 CHF)	Successful trials (0.2 CHF)	CrPCr	GSH	Ins	Lac	NAANAAG	PE	Tau	Score Component 1	Score Component 2	Score Component 3	Score Component 4	Score Component 5	Score Component 6	Score Component 7	GSH_OL
52	20	18	14	6.432	1.165	4.303	0.594	8.755	2.393	0.972	-0.728378	-0.29537	-0.780015	-0.844695	-1.00753	-0.348497	-0.555173	1.162
57	20	20	18	7.091	2.331	5.551	0.587	8.183	3.722	1.24	-1.79755	0.437516	1.09993	-0.972554	0.354574	1.91749	-0.845828	1.175
29	14	12	4	6.677	0.864	3.817	0.779	9.144	3.097	1.479	-0.65109	-0.910801	0.788279	0.374251	1.39768	-1.54712	-0.22222
40	16	15	9	7.91	1.129	4.683	0.91	10.378	2.553	1.2	0.998371	-0.110858	-0.373823	1.47354	-0.498873	-0.870752	-0.583368
33	12	13	8	7.231	1.387	4.035	1.058	9.109	2.216	1.27	-0.638903	-1.39901	-0.919015	2.77617	-0.219868	0.712602	0.0694844	1.328
13	9	3	1	6.95	0.917	3.431	0.668	8.863	2.462	0.898	-0.541638	-1.59108	-0.598097	-0.176108	-1.42881	-0.511136	1.08396	1.111
53	20	17	16	9.013	2.142	6.026	0.673	10.801	2.998	1.298	1.34636	0.981061	-0.148705	-0.607133	0.049323	1.08886	-0.41009	1.2
54	17	19	18	8.724	2.183	6.192	0.92	10.151	2.574	1.557	0.259592	1.14697	-0.683558	1.25539	1.10602	1.23902	-0.434599	1.058
33	18	15	0	6.226	1.253	4.355	0.591	8.151	2.747	0.994	-1.51544	-0.241925	-0.186823	-0.821887	-0.762124	-0.240744	-0.465894
43	19	15	9	9.601	2.066	5.451	0.67	10.017	3.693	1.046	0.50411	0.0677419	0.935965	-0.390242	-0.967718	1.08882	1.78549	1.155
42	19	13	10	8.206	1.578	5.265	0.751	9.01	2.217	1.776	-1.29742	0.563216	-1.04784	-0.293076	2.72022	-0.291347	2.03591	1.108
56	18	19	19	7.068	1.148	4.414	0.573	10.728	2.661	1.422	1.43261	-0.253657	-0.195309	-1.40803	0.962857	-0.927275	-1.56131
41	18	12	11	8.302	1.522	3.667	0.638	10.381	3.491	1.261	1.03627	-2.10567	0.969721	-0.669315	0.147145	0.635496	1.15068	1.334
54	20	19	15	8.368	1.338	4.99	0.772	9.923	3.429	1.236	0.343525	0.226121	0.964501	0.34781	0.00409166	-0.911112	0.376764
49	19	17	13	8.743	1.612	5.224	0.664	10.083	4.152	1.18	0.577923	0.311867	2.01365	-0.464608	-0.146746	-0.481686	0.340591
41	17	15	9	7.655	0.929	5.359	0.727	9.605	2.391	1.101	0.0716138	1.43542	-0.688649	-0.0383854	-0.584919	-2.08223	-0.248734
48	15	17	16	6.369	1.161	4.321	0.57	8.598	2.174	1.12	-1.04777	-0.212516	-1.11526	-1.16624	-0.228184	-0.424358	-0.180605
35	20	14	1	9.094	2.061	6.183	0.737	10.014	2.702	1.24	0.327949	1.32987	-0.639454	-0.0736072	-0.184991	0.838882	0.615194
42	14	17	11	8.435	1.537	4.529	0.745	11.276	2.296	1.514	1.91129	-0.808964	-0.969207	-0.150062	0.991972	0.383446	0.0633446	1.135
59	19	20	20	8.426	1.659	5.695	0.901	9.246	4.222	1.24	-0.601672	0.978915	2.25694	1.48667	0.0170848	-0.590665	-0.243105	0.855
35	15	14	6	8.893	1.765	5.983	0.739	9.786	2.619	0.911	0.319905	1.34298	-0.767638	0.171566	-1.74379	0.263472	0.594073	1.273
58	20	19	19	6.129	1.641	4.306	0.727	9.221	2.89	1.24	-0.309665	-0.891827	0.0844112	0.190536	0.0225987	1.05882	-2.36456	0.888
				Mean imputation for missing values

## Sheet: Figure 1d-f
Figure 1d-f
Metabolite groups (High - H, Low - L)		Effort-based motivated performance								Spectroscopy principal components							Occipital lobe (OL) GSH group (high - H, low - L)	Grip force performance								Condition
GSH_HL	PE_HL	Successful trials (1 CHF) H1	Successful trials (0.5 CHF) H1	Successful trials (0.2 CHF) H1	Successful trials (1 CHF) H2	Successful trials (0.5 CHF) H2	Successful trials (0.2 CHF) H2	Successful trials (average 0.2 CHF 0.5 CHF) H1	Successful trials (average 0.2 CHF 0.5 CHF) H2	Score Component 1	Score Component 2	Score Component 3	Score Component 4	Score Component 5	Score Component 6	Score Component 7	GSH_HL_OL	Grip (1 CHF) H1	Grip (0.5 CHF) H1	Grip (0.2 CHF) H1	Grip (1 CHF) H2	Grip (0.5 CHF) H2	Grip (0.2 CHF) H2	Grip (average 0.2 CHF 0.5 CHF) H1	Grip (average 0.2 CHF 0.5 CHF) H2	Condition
0	0	10	9	6	10	9	8	7.5	8.5	-0.728378	-0.29537	-0.780015	-0.844695	-1.00753	-0.348497	-0.555173	1	9.65381	9.4949	7.74265	9.92495	9.86703	9.40893	8.61878	9.63798	Competition
1	1	10	10	9	10	10	9	9.5	9.5	-1.79755	0.437516	1.09993	-0.972554	0.354574	1.91749	-0.845828	1	11.3908	11.823	10.6075	11.9015	11.3857	10.2353	11.2153	10.8105	Competition
0	1	8	5	2	6	7	2	3.5	4.5	-0.65109	-0.910801	0.788279	0.374251	1.39768	-1.54712	-0.22222		10.1782	9.94829	7.14992	8.88031	9.66707	5.62546	8.54911	7.64626	Isolation
0	0	9	7	5	7	8	4	6	6	0.998371	-0.110858	-0.373823	1.47354	-0.498873	-0.870752	-0.583368		6.77495	6.84303	5.32749	6.47534	6.50792	3.79411	6.08526	5.15102	Competition
0	0	6	7	5	6	6	3	6	4.5	-0.638903	-1.39901	-0.919015	2.77617	-0.219868	0.712602	0.0694844	1	7.55948	7.64577	6.01179	7.09263	6.95825	4.45077	6.82878	5.70451	Isolation
0	0	6	1	1	3	2	0	1	1	-0.541638	-1.59108	-0.598097	-0.176108	-1.42881	-0.511136	1.08396	0	9.1128	6.63638	5.45717	7.48887	8.02587	3.56352	6.04678	5.79469	Isolation
1	1	10	7	6	10	10	10	6.5	10	1.34636	0.981061	-0.148705	-0.607133	0.049323	1.08886	-0.41009	1	9.74466	8.56806	7.81296	10.0383	9.38269	9.13286	8.19051	9.25778	Isolation
1	0	9	10	10	8	9	8	10	8.5	0.259592	1.14697	-0.683558	1.25539	1.10602	1.23902	-0.434599	0	9.02865	9.81616	9.69441	8.70692	8.95226	8.45578	9.75528	8.70402	Competition
0	1	9	5	0	9	10	0	2.5	5	-1.51544	-0.241925	-0.186823	-0.821887	-0.762124	-0.240744	-0.465894		10.7533	8.64696	3.02492	9.92346	10.0414	0.385735	5.83594	5.21359	Isolation
1	1	10	7	4	9	8	5	5.5	6.5	0.50411	0.0677419	0.935965	-0.390242	-0.967718	1.08882	1.78549	1	8.98008	8.45693	5.9677	8.52757	8.10193	6.36531	7.21232	7.23362	Isolation
1	0	10	7	6	9	6	4	6.5	5	-1.29742	0.563216	-1.04784	-0.293076	2.72022	-0.291347	2.03591	0	9.70526	8.36586	8.51714	9.53175	7.94533	7.94822	8.4415	7.94677	Isolation
0	0	9	9	9	9	10	10	9	10	1.43261	-0.253657	-0.195309	-1.40803	0.962857	-0.927275	-1.56131		8.05446	8.20316	8.19535	8.56492	8.84979	8.41081	8.19925	8.6303	Competition
0	1	10	7	5	8	5	6	6	5.5	1.03627	-2.10567	0.969721	-0.669315	0.147145	0.635496	1.15068	1	10.112	9.41578	8.35337	9.66487	7.95142	8.70302	8.88457	8.32722	Isolation
0	1	10	9	5	10	10	10	7	10	0.343525	0.226121	0.964501	0.34781	0.00409166	-0.911112	0.376764		9.61257	8.96752	6.34418	9.99126	9.1766	8.99381	7.65585	9.0852	Isolation
1	1	9	8	7	10	9	6	7.5	7.5	0.577923	0.311867	2.01365	-0.464608	-0.146746	-0.481686	0.340591		10.8207	11.0929	10.3324	11.4024	10.8549	9.6615	10.7126	10.2582	Competition
0	0	9	9	4	8	6	5	6.5	5.5	0.0716138	1.43542	-0.688649	-0.0383854	-0.584919	-2.08223	-0.248734		14.8918	14.1113	10.5907	13.5572	11.748	9.19144	12.351	10.4697	Competition
0	0	8	9	9	7	8	7	9	7.5	-1.04777	-0.212516	-1.11526	-1.16624	-0.228184	-0.424358	-0.180605		9.08472	8.586	8.67979	6.9635	7.2922	6.82427	8.6329	7.05824	Competition
1	1	10	7	1	10	7	0	4	3.5	0.327949	1.32987	-0.639454	-0.0736072	-0.184991	0.838882	0.615194		8.11205	6.92852	2.93108	9.00568	6.36442	0.875123	4.9298	3.61977	Isolation
1	0	6	10	6	8	7	5	8	6	1.91129	-0.808964	-0.969207	-0.150062	0.991972	0.383446	0.0633446	0	7.63709	9.04105	7.53374	7.70138	7.92885	6.94968	8.28739	7.43926	Competition
1	1	9	10	10	10	10	10	10	10	-0.601672	0.978915	2.25694	1.48667	0.0170848	-0.590665	-0.243105	0	7.658	7.70248	7.82357	7.87198	7.68491	7.47463	7.76302	7.57977	Competition
1	0	7	7	3	8	7	3	5	5	0.319905	1.34298	-0.767638	0.171566	-1.74379	0.263472	0.594073	1	6.38627	5.74702	5.17416	6.4989	6.65296	3.00343	5.46059	4.82819	Isolation
1	1	10	10	10	10	9	9	10	9	-0.309665	-0.891827	0.0844112	0.190536	0.0225987	1.05882	-2.36456	0									Competition

## Sheet: Extra stats Jamovi output
Results
Repeated Measures ANOVA (Triple interaction)
Within Subjects Effects
		Sum of Squares		df		Mean Square		F		p		η²p
Block		0.557		1		0.557		0.6269		0.441		0.04
Block ✻ GSH_HL		0.465		1		0.465		0.5236		0.48		0.034
Block ✻ Score Component 1		0.43		1		0.43		0.4841		0.497		0.031
Block ✻ Score Component 3		1.798		1		1.798		2.024		0.175		0.119
Block ✻ Score Component 4		0.994		1		0.994		1.1195		0.307		0.069
Block ✻ Score Component 5		0.902		1		0.902		1.0157		0.33		0.063
Block ✻ Score Component 7		1.047		1		1.047		1.1784		0.295		0.073
Residual		13.324		15		0.888
Reward		80.182		1		80.182		25.1564		< .001		0.626
Reward ✻ GSH_HL		0.231		1		0.231		0.0725		0.791		0.005
Reward ✻ Score Component 1		1.187		1		1.187		0.3725		0.551		0.024
Reward ✻ Score Component 3		0.233		1		0.233		0.073		0.791		0.005
Reward ✻ Score Component 4		2.447		1		2.447		0.7679		0.395		0.049
Reward ✻ Score Component 5		3.171		1		3.171		0.9948		0.334		0.062
Reward ✻ Score Component 7		21.381		1		21.381		6.708		0.021		0.309
Residual		47.81		15		3.187
Block ✻ Reward		1.375		1		1.375		1.7351		0.208		0.104
Block ✻ Reward ✻ GSH_HL		4.502		1		4.502		5.6814		0.031		0.275
Block ✻ Reward ✻ Score Component 1		0.000572		1		0.000572		0.000722		0.979		0
Block ✻ Reward ✻ Score Component 3		1.528		1		1.528		1.9285		0.185		0.114
Block ✻ Reward ✻ Score Component 4		0.79		1		0.79		0.9973		0.334		0.062
Block ✻ Reward ✻ Score Component 5		0.166		1		0.166		0.2089		0.654		0.014
Block ✻ Reward ✻ Score Component 7		0.369		1		0.369		0.4657		0.505		0.03
Residual		11.887		15		0.792
Note. Type 3 Sums of Squares
Between Subjects Effects
		Sum of Squares		df		Mean Square		F		p		η²p
GSH_HL		22.798		1		22.798		3.0489		0.101		0.169
Score Component 1		0.641		1		0.641		0.0858		0.774		0.006
Score Component 3		23.775		1		23.775		3.1795		0.095		0.175
Score Component 4		9.14		1		9.14		1.2223		0.286		0.075
Score Component 5		10.454		1		10.454		1.398		0.255		0.085
Score Component 7		57.281		1		57.281		7.6605		0.014		0.338
Residual		112.161		15		7.477
Note. Type 3 Sums of Squares
Assumptions
Homogeneity of Variances Test (Levene's)
		F		df1		df2		p
success_count0205H1		0.000404		1		20		0.984
success_count_1H1		0.0774		1		20		0.784
success_count0205H2		0.0611		1		20		0.807
success_count_1H2		3.5584		1		20		0.074
Repeated Measures ANOVA (Triple interaction): PE
Within Subjects Effects
		Sum of Squares		df		Mean Square		F		p		η²p
Block		0.5568		1		0.5568		0.74185		0.404		0.05
Block ✻ PE_HL		3.6747		1		3.6747		4.8958		0.044		0.259
Block ✻ Score Component 1		0.7753		1		0.7753		1.03288		0.327		0.069
Block ✻ Score Component 2		1.759		1		1.759		2.34352		0.148		0.143
Block ✻ Score Component 4		0.4599		1		0.4599		0.61272		0.447		0.042
Block ✻ Score Component 5		0.6566		1		0.6566		0.87473		0.366		0.059
Block ✻ Score Component 6		0.0984		1		0.0984		0.13114		0.723		0.009
Block ✻ Score Component 7		0.8094		1		0.8094		1.07832		0.317		0.072
Residual		10.5081		14		0.7506
Reward		80.1818		1		80.1818		27.4297		< .001		0.662
Reward ✻ PE_HL		7.0422		1		7.0422		2.4091		0.143		0.147
Reward ✻ Score Component 1		0.9248		1		0.9248		0.31636		0.583		0.022
Reward ✻ Score Component 2		0.012		1		0.012		0.0041		0.95		0
Reward ✻ Score Component 4		1.3036		1		1.3036		0.44596		0.515		0.031
Reward ✻ Score Component 5		3.6466		1		3.6466		1.24747		0.283		0.082
Reward ✻ Score Component 6		1.7593		1		1.7593		0.60183		0.451		0.041
Reward ✻ Score Component 7		21.8164		1		21.8164		7.46326		0.016		0.348
Residual		40.9244		14		2.9232
Block ✻ Reward		1.375		1		1.375		1.46306		0.246		0.095
Block ✻ Reward ✻ PE_HL		2.5349		1		2.5349		2.69729		0.123		0.162
Block ✻ Reward ✻ Score Component 1		0.0143		1		0.0143		0.01518		0.904		0.001
Block ✻ Reward ✻ Score Component 2		0.4108		1		0.4108		0.43708		0.519		0.03
Block ✻ Reward ✻ Score Component 4		0.4399		1		0.4399		0.46807		0.505		0.032
Block ✻ Reward ✻ Score Component 5		0.7554		1		0.7554		0.80377		0.385		0.054
Block ✻ Reward ✻ Score Component 6		1.9249		1		1.9249		2.04822		0.174		0.128
Block ✻ Reward ✻ Score Component 7		0.1746		1		0.1746		0.18581		0.673		0.013
Residual		13.1573		14		0.9398
Note. Type 3 Sums of Squares
Between Subjects Effects
		Sum of Squares		df		Mean Square		F		p		η²p
PE_HL		11.74		1		11.74		1.57		0.231		0.101
Score Component 1		2.67		1		2.67		0.357		0.56		0.025
Score Component 2		38.22		1		38.22		5.112		0.04		0.267
Score Component 4		5.69		1		5.69		0.761		0.398		0.052
Score Component 5		19.14		1		19.14		2.56		0.132		0.155
Score Component 6		8.13		1		8.13		1.088		0.315		0.072
Score Component 7		48.77		1		48.77		6.523		0.023		0.318
Residual		104.68		14		7.48
Note. Type 3 Sums of Squares
Assumptions
Homogeneity of Variances Test (Levene's)
		F		df1		df2		p
success_count0205H1		0.172		1		20		0.683
success_count_1H1		11.825		1		20		0.003
success_count0205H2		1.474		1		20		0.239
success_count_1H2		0.636		1		20		0.435
Repeated Measures ANOVA (Occipital)
Within Subjects Effects
		Sum of Squares		df		Mean Square		F		p		η²p
Block		1.0114		1		1.0114		1.2621		0.285		0.103
Block ✻ GSH_HL_OL		1.9345		1		1.9345		2.4139		0.149		0.18
Residual		8.8155		11		0.8014
Reward		31.4304		1		31.4304		12.2332		0.005		0.527
Reward ✻ GSH_HL_OL		2.9304		1		2.9304		1.1406		0.308		0.094
Residual		28.2619		11		2.5693
Block ✻ Reward		0.0114		1		0.0114		0.0116		0.916		0.001
Block ✻ Reward ✻ GSH_HL_OL		1.7038		1		1.7038		1.7328		0.215		0.136
Residual		10.8155		11		0.9832
Note. Type 3 Sums of Squares
Between Subjects Effects
		Sum of Squares		df		Mean Square		F		p		η²p
GSH_HL_OL		0.593		1		0.593		0.0333		0.859		0.003
Residual		196.214		11		17.838
Note. Type 3 Sums of Squares
Assumptions
Homogeneity of Variances Test (Levene's)
		F		df1		df2		p
success_count0205H1		2.6591		1		11		0.131
success_count_1H1		0.0878		1		11		0.773
success_count0205H2		0.7743		1		11		0.398
success_count_1H2		0.3956		1		11		0.542
Repeated Measures ANOVA (interaction for high reward)
Within Subjects Effects
		Sum of Squares		df		Mean Square		F		p		η²p
Block		1.84091		1		1.84091		3.02694		0.102		0.168
Block ✻ GSH_HL		3.93066		1		3.93066		6.46305		0.023		0.301
Block ✻ Score Component 1		0.19959		1		0.19959		0.32817		0.575		0.021
Block ✻ Score Component 3		0.00547		1		0.00547		0.00899		0.926		0.001
Block ✻ Score Component 4		0.00586		1		0.00586		0.00963		0.923		0.001
Block ✻ Score Component 5		0.1474		1		0.1474		0.24237		0.63		0.016
Block ✻ Score Component 7		1.32938		1		1.32938		2.18585		0.16		0.127
Residual		9.12262		15		0.60817
Note. Type 3 Sums of Squares
Between Subjects Effects
		Sum of Squares		df		Mean Square		F		p		η²p
GSH_HL		9.2199		1		9.2199		2.5661		0.13		0.146
Score Component 1		0.0417		1		0.0417		0.0116		0.916		0.001
Score Component 3		9.652		1		9.652		2.6863		0.122		0.152
Score Component 4		10.5233		1		10.5233		2.9288		0.108		0.163
Score Component 5		1.0549		1		1.0549		0.2936		0.596		0.019
Score Component 7		4.335		1		4.335		1.2065		0.289		0.074
Residual		53.8957		15		3.593
Note. Type 3 Sums of Squares
Assumptions
Homogeneity of Variances Test (Levene's)
		F		df1		df2		p
success_count_1H1		0.0774		1		20		0.784
success_count_1H2		3.5584		1		20		0.074
Repeated Measures ANOVA (interaction for low reward)
Within Subjects Effects
		Sum of Squares		df		Mean Square		F		p		η²p
Block		0.0909		1		0.0909		0.0848		0.775		0.006
Block ✻ GSH_HL		1.0367		1		1.0367		0.9666		0.341		0.061
Block ✻ Score Component 1		0.231		1		0.231		0.2153		0.649		0.014
Block ✻ Score Component 3		3.3207		1		3.3207		3.0961		0.099		0.171
Block ✻ Score Component 4		1.7789		1		1.7789		1.6585		0.217		0.1
Block ✻ Score Component 5		0.9203		1		0.9203		0.8581		0.369		0.054
Block ✻ Score Component 7		0.0864		1		0.0864		0.0805		0.78		0.005
Residual		16.0881		15		1.0725
Note. Type 3 Sums of Squares
Between Subjects Effects
		Sum of Squares		df		Mean Square		F		p		η²p
GSH_HL		13.81		1		13.81		1.953		0.183		0.115
Score Component 1		1.79		1		1.79		0.253		0.622		0.017
Score Component 3		14.36		1		14.36		2.03		0.175		0.119
Score Component 4		1.06		1		1.06		0.15		0.704		0.01
Score Component 5		12.57		1		12.57		1.777		0.202		0.106
Score Component 7		74.33		1		74.33		10.51		0.005		0.412
Residual		106.08		15		7.07
Note. Type 3 Sums of Squares
Assumptions
Homogeneity of Variances Test (Levene's)
		F		df1		df2		p
success_count0205H1		0.000404		1		20		0.984
success_count0205H2		0.0611		1		20		0.807
Descriptives
Descriptives
		CrPCr_		GSH_		Ins_		Lac_		NAANAAG_		PE_		Tau_		Lac		Tau		GPC
N		22		22		22		22		22		22		22		20		18		15
Missing		0		0		0		0		0		0		0		2		4		7
Mean		7.8		1.52		4.9		0.727		9.61		2.9		1.24		0.727		1.24		1.07
Median		8.06		1.53		4.84		0.727		9.7		2.68		1.24		0.705		1.22		0.962
Standard deviation		1.06		0.436		0.843		0.128		0.851		0.627		0.217		0.134		0.242		0.306
Minimum		6.13		0.864		3.43		0.57		8.15		2.17		0.898		0.57		0.898		0.686
Maximum		9.6		2.33		6.19		1.06		11.3		4.22		1.78		1.06		1.78		1.82
Correlation Matrix
Correlation Matrix
				successful_trials_all		success_count1_all		success_count05_all		success_count02_all		CrPCr_		GSH_		Ins_		Lac_		NAANAAG_		PE_		Tau_
successful_trials_all		Spearman's rho		—
		p-value		—
		N		—
success_count1_all		Spearman's rho		0.638	**	—
		p-value		0.001		—
		N		22		—
success_count05_all		Spearman's rho		0.913	***	0.532	*	—
		p-value		< .001		0.011		—
		N		22		22		—
success_count02_all		Spearman's rho		0.954	***	0.444	*	0.845	***	—
		p-value		< .001		0.038		< .001		—
		N		22		22		22		—
CrPCr_		Spearman's rho		0.06		0.178		-0.031		-0.042		—
		p-value		0.791		0.429		0.892		0.851		—
		N		22		22		22		22		—
GSH_		Spearman's rho		0.468	*	0.52	*	0.379		0.341		0.615	**	—
		p-value		0.028		0.013		0.082		0.12		0.003		—
		N		22		22		22		22		22		—
Ins_		Spearman's rho		0.363		0.404		0.381		0.213		0.717	***	0.727	***	—
		p-value		0.097		0.062		0.08		0.342		< .001		< .001		—
		N		22		22		22		22		22		22		—
Lac_		Spearman's rho		-0.153		-0.243		-0.138		-0.133		0.333		0.083		0.229		—
		p-value		0.497		0.277		0.54		0.556		0.13		0.713		0.305		—
		N		22		22		22		22		22		22		22		—
NAANAAG_		Spearman's rho		0.17		0.013		0.078		0.201		0.65	**	0.211		0.304		0.233		—
		p-value		0.449		0.956		0.73		0.37		0.001		0.345		0.168		0.296		—
		N		22		22		22		22		22		22		22		22		—
PE_		Spearman's rho		0.379		0.515	*	0.31		0.255		0.3		0.412		0.243		-0.115		0.179		—
		p-value		0.082		0.014		0.161		0.253		0.175		0.058		0.274		0.61		0.424		—
		N		22		22		22		22		22		22		22		22		22		—
Tau_		Spearman's rho		0.242		0.016		0.109		0.346		0.149		0.228		0.132		0.395		0.396		-0.03		—
		p-value		0.277		0.943		0.63		0.115		0.507		0.308		0.558		0.069		0.068		0.895		—
		N		22		22		22		22		22		22		22		22		22		22		—
Note. * p < .05, ** p < .01, *** p < .001
Partial Correlation
Partial Correlation
				success_count1_all		GSH_		PE_
success_count1_all		Spearman's rho		—
		p-value		—
GSH_		Spearman's rho		0.519	*	—
		p-value		0.027		—
PE_		Spearman's rho		0.43		0.697	**	—
		p-value		0.075		0.001		—
Note. controlling for 'Score Component 3', 'Score Component 4', 'Score Component 5', and 'Score Component 7'
Note. * p < .05, ** p < .01, *** p < .001
Linear Regression
Model Fit Measures
Model		R		R²
1		0.777		0.604
Model Coefficients - success_count1_all
Predictor		Estimate		SE		t		p
Intercept		5.598		7.196		0.778		0.45
GSH_		0.546		1.869		0.292		0.774
CrPCr_		-1.372		1.027		-1.336		0.203
Ins_		2.373		1.046		2.268		0.04
Lac_		-7.584		4.436		-1.71		0.109
NAANAAG_		0.636		0.929		0.684		0.505
PE_		2.02		0.934		2.163		0.048
Tau_		2.774		2.671		1.039		0.317
Assumption Checks
Collinearity Statistics
		VIF		Tolerance
GSH_		2.62		0.381
CrPCr_		4.65		0.215
Ins_		3.08		0.325
Lac_		1.27		0.79
NAANAAG_		2.47		0.405
PE_		1.35		0.739
Tau_		1.33		0.752
Normality Test (Shapiro-Wilk)
Statistic		p
0.98		0.918
Linear Regression
Model Fit Measures
Model		R		R²
1		0.716		0.513
Model Coefficients - success_count1_all
Predictor		Estimate		SE		t		p		Stand. Estimate
Intercept		12.5851		2.015		6.245		< .001
GSH_		3.0588		1.282		2.386		0.031		0.4459
Score Component 1		-0.0691		0.541		-0.128		0.9		-0.0231
Score Component 3		0.8998		0.551		1.632		0.123		0.3008
Score Component 4		-0.9809		0.539		-1.82		0.089		-0.328
Score Component 5		0.3891		0.542		0.718		0.484		0.1301
Score Component 7		-0.6602		0.541		-1.22		0.241		-0.2207
Assumption Checks
Collinearity Statistics
		VIF		Tolerance
GSH_		1.08		0.93
Score Component 1		1.01		0.991
Score Component 3		1.05		0.956
Score Component 4		1		1
Score Component 5		1.01		0.988
Score Component 7		1.01		0.992
Normality Test (Shapiro-Wilk)
Statistic		p
0.986		0.98
Linear Regression
Model Fit Measures
Model		R		R²
1		0.777		0.604
Model Coefficients - success_count1_all
Predictor		Estimate		SE		t		p
Intercept		5.598		7.196		0.778		0.45
PE_		2.02		0.934		2.163		0.048
CrPCr_		-1.372		1.027		-1.336		0.203
GSH_		0.546		1.869		0.292		0.774
Ins_		2.373		1.046		2.268		0.04
Lac_		-7.584		4.436		-1.71		0.109
NAANAAG_		0.636		0.929		0.684		0.505
Tau_		2.774		2.671		1.039		0.317
Assumption Checks
Collinearity Statistics
		VIF		Tolerance
PE_		1.35		0.739
CrPCr_		4.65		0.215
GSH_		2.62		0.381
Ins_		3.08		0.325
Lac_		1.27		0.79
NAANAAG_		2.47		0.405
Tau_		1.33		0.752
Normality Test (Shapiro-Wilk)
Statistic		p
0.98		0.918
Linear Regression
Model Fit Measures
Model		R		R²
1		0.777		0.604
Model Coefficients - success_count1_all
Predictor		Estimate		SE		t		p		Stand. Estimate
Intercept		11.6777		2.424		4.8181		< .001
PE_		1.91667		0.82		2.3383		0.035		0.40181
Score Component 1		0.00951		0.504		0.0189		0.985		0.00318
Score Component 2		1.27367		0.506		2.5173		0.025		0.42584
Score Component 4		-0.92753		0.504		-1.8409		0.087		-0.31011
Score Component 5		0.59748		0.504		1.1853		0.256		0.19976
Score Component 6		0.54325		0.509		1.068		0.304		0.18163
Score Component 7		-0.60857		0.504		-1.2074		0.247		-0.20347
Assumption Checks
Collinearity Statistics
		VIF		Tolerance
PE_		1.04		0.959
Score Component 1		1		0.999
Score Component 2		1.01		0.989
Score Component 4		1		0.997
Score Component 5		1		0.997
Score Component 6		1.02		0.979
Score Component 7		1		0.997
Normality Test (Shapiro-Wilk)
Statistic		p
0.98		0.918
Principal Component Analysis
Component Loadings
		Component
		1		2		3		4		5		6		7		Uniqueness
CrPCr_		0.559		0.481										0.554		1.11e-16
GSH_				0.45								0.853				-2.22e−16
Ins_				0.924								0.325				1.33e-15
Lac_								0.981								2.78e-15
NAANAAG_		0.978														1.11e-15
PE_						0.979										4.66e-15
Tau_										0.972						-8.88e−16
Note. 'varimax' rotation was used
Component Statistics
Summary
Component		SS Loadings		% of Variance		Cumulative %
1		1.324		18.91		18.9
2		1.313		18.76		37.7
3		1.065		15.21		52.9
4		1.027		14.67		67.6
5		1.008		14.4		82
6		0.932		13.31		95.3
7		0.331		4.73		100
Independent Samples T-Test
Independent Samples T-Test
				Statistic		df		p				Effect Size
success_count_1H2		Student's t		-2.539		20		0.02		Cohen's d		-1.083
		Mann-Whitney U		27				0.025		Rank biserial correlation		0.554
success_count_1H1		Student's t		-0.909		20		0.374		Cohen's d		-0.387
		Mann-Whitney U		43				0.239		Rank biserial correlation		0.289
Assumptions
Normality Test (Shapiro-Wilk)
		W		p
success_count_1H2		0.916		0.062
success_count_1H1		0.833		0.002
Note. A low p-value suggests a violation of the assumption of normality
Homogeneity of Variances Test (Levene's)
		F		df		df2		p
success_count_1H2		4.251		1		20		0.052
success_count_1H1		0.129		1		20		0.723
Note. A low p-value suggests a violation of the assumption of equal variances
Group Descriptives
		Group		N		Mean		Median		SD		SE
success_count_1H2		0		11		7.55		8		2.07		0.623
		1		11		9.27		10		0.905		0.273
success_count_1H1		0		11		8.55		9		1.44		0.434
		1		11		9.09		10		1.375		0.415
References
[1] The jamovi project (2021). jamovi. (Version 2.2) [Computer Software]. Retrieved from https://www.jamovi.org.
[2] R Core Team (2021). R: A Language and environment for statistical computing. (Version 4.0) [Computer software]. Retrieved from https://cran.r-project.org. (R packages retrieved from MRAN snapshot 2021-04-01).
[3] Singmann, H. (2018). afex: Analysis of Factorial Experiments. [R package]. Retrieved from https://cran.r-project.org/package=afex.
[4] Lenth, R. (2020). emmeans: Estimated Marginal Means, aka Least-Squares Means. [R package]. Retrieved from https://cran.r-project.org/package=emmeans.
[5] Kim, S. (2015). ppcor: Partial and Semi-Partial (Part) Correlation. [R package]. Retrieved from https://cran.r-project.org/package=ppcor.
[6] Fox, J., & Weisberg, S. (2020). car: Companion to Applied Regression. [R package]. Retrieved from https://cran.r-project.org/package=car.
[7] Revelle, W. (2019). psych: Procedures for Psychological, Psychometric, and Personality Research. [R package]. Retrieved from https://cran.r-project.org/package=psych.
[8] Kerby, D. S. (2014). The simple difference formula: An approach to teaching nonparametric correlation. Comprehensive Psychology, 3, 2165–2228.

## Sheet: Grip force Jamovi output
Repeated Measures ANOVA (Triple interaction)
Within Subjects Effects
		Sum of Squares		df		Mean Square		F		p
Reward		35.178		1		35.178		19.263		< .001
Reward ✻ GSH_HL		1.263		1		1.263		0.692		0.416
Residual		34.698		19		1.826
Block		2.453		1		2.453		5.1		0.036
Block ✻ GSH_HL		0.957		1		0.957		1.991		0.174
Residual		9.139		19		0.481
Reward ✻ Block		0.202		1		0.202		1.414		0.249
Reward ✻ Block ✻ GSH_HL		0.858		1		0.858		5.999		0.024
Residual		2.719		19		0.143
Note. Type 3 Sums of Squares
Between Subjects Effects
		Sum of Squares		df		Mean Square		F		p
GSH_HL		0.0017		1		0.0017		0.000137		0.991
Residual		236.763		19		12.4612
Note. Type 3 Sums of Squares
Repeated Measures ANOVA (interaction for high reward)
Within Subjects Effects
		Sum of Squares		df		Mean Square		F		p
Block		0.623		1		0.623		2.61		0.123
Block ✻ GSH_HL		1.815		1		1.815		7.6		0.013
Residual		4.536		19		0.239
Note. Type 3 Sums of Squares
Between Subjects Effects
		Sum of Squares		df		Mean Square		F		p
GSH_HL		0.679		1		0.679		0.101		0.754
Residual		127.224		19		6.696
Note. Type 3 Sums of Squares
Repeated Measures ANOVA (interaction for low reward)
Within Subjects Effects
		Sum of Squares		df		Mean Square		F		p
Block		1.04		1		1.036		10.173		0.006
Block ✻ GSH_HL		0.000537		1		0.000537		0.00527		0.943
Residual		1.63		16		0.102
Note. Type 3 Sums of Squares
Between Subjects Effects
		Sum of Squares		df		Mean Square		F		p
GSH_HL		3.51		1		3.51		0.456		0.509
Residual		123.27		16		7.7
Note. Type 3 Sums of Squares
ANCOVA (effect on the last flock, controlled for performance in the first block)
ANCOVA - Grip1_34
		Sum of Squares		df		Mean Square		F		p
Grip1H1		56.76		1		56.759		117.41		< .001
GSH_HL		3.1		1		3.095		6.4		0.021
Residuals		8.7		18		0.483
Estimated Marginal Means
GSH_HL
