# Supplementary material for: Glutathione in the nucleus accumbens regulates motivation to exert reward-incentivized effort
Source: eLife. 2022 Nov 8;11:e77791. doi: 10.7554/eLife.77791 (PMC9642999; doi:10.7554/eLife.77791)
Supplement: Figure 3—source data 1. [file elife-77791-fig3-data1.xlsx]

## Sheet: Figure 3d
Figure 3d
	HPLC results for GSH (nM/mg ) in NuAc
	L-GSH	H-GSH
	313.2	672
	390.8	708.1
	480.4	708.3
	516.8	729.4
	521.1	741.5
	570.9	855.4
	604.9	981.3
	659.6	1044.8

## Sheet: Figure 3e
Figure 3e
	Progressive Ratio results (Breakpoint)
	L-GSH	H-GSH
	28	56
	40	111
	40	40
	28	79
	56	28
	20	79
	40	56
		56

## Sheet: Figure 3f
Figure 3f
	Progressive Ratio results (Rewards)
	L-GSH	H-GSH
	8	13
	11	15
	12	12
	12	14
	11	11
	13	14
	10	13
	12	13

## Sheet: Figure 3g
Figure 3g
	Progressive Ratio results (Correct nosepokes)
	L-GSH	H-GSH
	43	233
	116	431
	174	165
	158	267
	125	99
	217	284
	71	233
	168	207

## Sheet: Figure 3-figure suppl 1a
Figure 3-figure suppl 1a
	HPLC results for GSH (% of control ) in mPFC
	L-GSH	H-GSH
	86.2155	90.5099
	98.7453	65.0228
	98.288	83.0765
	85.478	88.4389
	91.0335	90.0445
	92.2006	111.581
	97.8943	120.204
	103.583	114.552

## Sheet: Figure 3-figure suppl1b
Figure 3-figure supplement 1b
	Elevated Plus Maze results (% time in the open arms)
	L-GSH	H-GSH
	29.5	10.1
	14.39	11.75
	26.52	14.16
	28.6	9.3
	29.59	25.58
	10.1	13.4
	21.6	28.6
	10.6	26.1

## Sheet: Figure3-figure suppl1c
Figure 3-figure supplement 1c
	Open Field results (% time in the center)
	L-GSH	H-GSH
	0.65	1.3
	0.45	2.12
	0.3	5.32
	3.41	1.37
	0	3.09
	1.67	4.19
	1.27	2.75
	38.88	1.06
	2.37	2.7
	4.35	2.45
	4.77	3.17
	9.5	2.06
	5.61	4.64
	4.04	6.14
	2.57	4.71
		4.33
		1.93
		13.2
		3.36
		4.49

## Sheet: Figure 3-figure suppl1d
Figure 3-figure supplement 1d
	Open Field results (distance cm)
	L-GSH	H-GSH
	3608.91	4312.97
	2593.9	3205.74
	2632.86	4413.15
	4434.56	3856.93
	2260.74	4085.95
	3659.23	4368.02
	2907.01	3382.9
	3491.14	3362.33
	3396.81	4380.94
	5163.41	4221.75
	4903.81	3992.62
	6311.61	3676.53
	2487.05	4191.4
	5856.54	4161.59
	5358.02	4126.46
		3477.34
		3895.08
		3559.36
		4066.81
		3931.89

## Sheet: Figure 3-figure suppl1e
	Figure 3-figure supplement 1e
		Open Field Novel object (% Time spent in the object)
		L-GSH	H-GSH
		30.69	13.14
		0	14.96
		26.44	45.66
		5.07	29.32
		0	25.01
		28.62	0.64
		0.6	13.32
		0	0
		33.02	21.64
		31.01	28.87
		47.46	0
		35.45	27.64
		51.45	38.67
		26.71	45.45
		14.16	20.48
			38.04
			15.13
			7.34
			26.84
			23.77

## Sheet: Figure 3-figure suppl1f
Figure 3-figure supplement 1f
Fixed ratio training results (Rewards/session)
Session	L-GSH										H-GSH
1	34	14	7	55	25		12	11			23	79		12	15	100	52	100	15
2	98	100	43	100	19		28	8			13	83		66	81	100	94	100	13
3	94	100	100	100	14		100	13			15	93		100	100	100	100	100	100
4	100	100	100	100	77		100	100			100	100		100	100	100	100	100	100
5	100	100	100	100	98		100	100			100	100		100	100	100	100	100	100
6	89	100	100	100	100		100	100			100	100		95	100	100	100	100	100

[truncated: 8 more sheets: Figure 3-figure suppl1g, Figure 3-figure suppl1h, Figure 3-figure suppl1i, Figure 3-figure suppl1j, Figure 3-figure suppl 1 k, Figure 3-figure suppl1l, Figure 3-figure suppl1m, Figure 3-figure suppl1n]
