# Supplementary material for: Glutathione in the nucleus accumbens regulates motivation to exert reward-incentivized effort
Source: eLife. 2022 Nov 8;11:e77791. doi: 10.7554/eLife.77791 (PMC9642999; doi:10.7554/eLife.77791)
Supplement: Figure 4—source data 1. [file elife-77791-fig4-data1.xlsx]

## Sheet: Figure 4c
Figure 4c
	HPLC results for GSH (% of control)
	Sal	BSO
	101.132	105.395
	98.8313	85.5042
	91.0964	114.324
	115.306	48.6547
	134.546	48.7626
	109.781	73.5846
	65.7009	65.7809
	83.6064	145.928
	97.1671	58.7628
	106.467	102.571
	95.2385	111.681
	88.321	54.4865
	61.2559	58.6976
	107.739	72.6676
	99.0553	48.7997
	51.5011	50.9816
	193.255	74.3546

## Sheet: Figure 4 d
Figure 4d
	Progressive Ratio results (Breakpoint)
	Sal	BSO
	28	56
	28	14
	20	40
	79	20
	56	40
	79	79
	56	40
	217	79
	155	40
	56	40
	111	56
	40	14
	56	28
	40	40
	56	40
	56	40
	111	56
	79	20
	40	56
		40
		40

## Sheet: Figure 4e
Figure 4e
	Progressive Ratio results (Rewards)
	Sal	BSO
	11	13
	11	9
	10	12
	14	10
	13	12
	14	14
	13	12
	17	14
	16	12
	13	12
	15	13
	12	9
	13	11
	12	12
	13	12
	13	12
	15	13
	14	10
	12	13
		12
		12

## Sheet: Figure 4f
Figure 4f
	Progressive Ratio results (Correct nosepokes)
	Sal	BSO
	116	247
	120	51
	82	168
	309	89
	216	170
	278	357
	195	169
	892	304
	640	157
	235	184
	469	209
	169	46
	195	114
	169	164
	216	182
	221	149
	452	264
	338	90
	163	229
		179
		167

## Sheet: Figure 4h
Figure 4h
	Progressive Ratio results (Breakpoint)
	Sal	BSO w
	79	56
	28	40
	40	56
	79	28
	56	40
	155	28
	79	56
	56	40
	20	56
	5	28
	20	20
	28	79
	28	79
	56	111
	111	40
	40	28
	20	28

## Sheet: Figure 4i
Figure 4i
	Progressive Ratio results (Rewards)
	Sal	BSO w
	14	13
	11	12
	12	13
	14	11
	13	12
	16	11
	14	13
	13	12
	10	13
	12	11
	10	10
	11	14
	11	14
	13	15
	15	12
	12	11
	10	11

## Sheet: Figure 4j
Figure 4j
	Progressive Ratio results (Correct nosepokes)
	Sal	BSO w
	339	201
	116	148
	160	235
	290	131
	265	184
	629	111
	331	221
	261	147
	91	256
	170	107
	73	88
	127	370
	92	278
	235	502
	488	161
	174	129
	65	107

## Sheet: Figure 4k
Figure 4k
	Progressive Ratio results (% of Correct nosepokes/total nosepokes)
	Sal	BSO w
	92.623	87.7729
	96.6667	90.2439
	87.4317	95.1417
	95.082	89.1157
	86.3192	92
	90.7648	94.8718
	97.3529	80.6569
	97.7528	84.4828
	86.6667	94.8148
	92.8962	89.1667
	92.4051	94.6237
	95.4887	95.8549
	86.7925	99.2857
	88.3459	90.4505
	82.0168	94.7059
	93.5484	76.7857
	100	84.252

## Sheet: Figure4-figure supplement 1a
Figure4-figure supplement 1a
	Open Field results (% time in center)
	Sal	BSO
	0.553296	1.06099
	6.57289	5.55494
	4.11972	0
	0.338851	2.72648
	6.2382	0.666622
	0.073328	2.42195
	2.18309	0
	3.70514	2.61316
	0	4.16639
	2.11986	0.877679

## Sheet: Figure 4-figure supplement 1b
Figure 4-figure supplement 1b
	Open Field results (distance (cm))
	Sal	BSO
	3109.35	3122.53
	2654.56	2981.29
	3813.89	2158.76
	3115.3	3346.26
	1818.31	2500.55
	2659.66	1444.48
	3427.08	490.093
	3069.15	2689.23
	910.139	2473.62
	2785.88	1533.51

[truncated: 11 more sheets: Figure 4-figure supplement1c, Figure 4-figure supplement 1d, Figure 4-figure supplement 1e, Figure 4-figure supplem 1f, Figure 4-figure supplement 1g, Figure 4-figure supplement 1h, Figure 4-figure suppl 1i, Figure 4-figure suppl 1j, Figure 4-figure supplement 1k, Figure 4-figure supplement 1m, Figure 4-figure supplement 1o]
