# Supplementary material for: Glutathione in the nucleus accumbens regulates motivation to exert reward-incentivized effort
Source: eLife. 2022 Nov 8;11:e77791. doi: 10.7554/eLife.77791 (PMC9642999; doi:10.7554/eLife.77791)
Supplement: Figure 5—source data 1. [file elife-77791-fig5-data1.xlsx]

## Sheet: Figure 5c
Figure 5c
		HPLC results for GSH (% of control)
		Veh	NAC
		129.123	142.222
		118.83	130.059
		111.345	103.86
		92.6316	106.667
		103.86	109.474
		81.4035	107.602
		88.8889	126.316
		73.9181
		85.6112	124.042
		93.3951	102.916
		102.786	107.702
		118.208	92.5794
		111.353	135.459
		86.9589	104.322
		83.0228	95.6642
		136.479	166.546
		93.5707	102.159
		88.6165	113.673
		117.414	143.45
		116.371	109.313
		95.7486	118.762
		93.9607	104.054
		98.102	167.688
		92.0537	88.8066
		86.35	86.3109

## Sheet: Figure 5d
Figure 5d
	Progressive Ratio results (Breakpoint)
	Veh	NAC
	40	40
	40	56
	28	79
	20	56
	40	79
	56	79
	40	40
	56	28
	28	56
		40

## Sheet: Figure 5e
Figure 5e
	Progressive Ratio results (Rewards)
	Veh	NAC
	12	12
	12	13
	11	14
	10	13
	12	14
	13	14
	12	12
	13	11
	11	13
		12

## Sheet: Figure 5f
Figure 5f
	Progressive Ratio results (Correct nosepokes)
	Veh	NAC
	172	244
	184	325
	111	235
	89	363
	145	327
	241	183
	155	162
	237	116
	130	197
		154

## Sheet: Figure 5-figure supplement 1a
Figure 5-figure supplement 1a
		Fixed ratio training results (Rewards/Session)
		Session	VEH										NAC
		1	9	14	21	32	19	17	22	17	11	24	6	5	11	23	9	47	40	59	54	20	35
		2	9	13	14	100	58	26	23	23	30	51	7	28	15	51	33	100	100	81	100	100	76
		3	24	77	100	100	100	71	93	96	67	100	4	72	28	74	100	100	100	100	100	100	100
		4	32	18	100	100	100	77	100	100	71	100	26	79	100	100	100	100	100	100	100	100	100
		5	100	100	100	100	100	100	100	100	100	100	100	100	100	100	100	100	100	100	100	100	96
		6	100	100	100	100	100	100	100	100	100	100	100	100	100	100	100	100	100	100	75	100	100

## Sheet: Figure 5-figure supplement 1b
Figure 5-figure supplement 1b
	Body weight (g/week)
	weeks	Vehicle												NAC
	0.5	329.6	355.5	336.5	351.9	281.05	341.6	344.7	341.9	368.9	313.1	316.7		352.3	360.1	378.5	299.5	336	333.3	344.5	337.6	296.7	320.3	327.8
	1	336	366.1	343.2	360.2	289.4	355	358.8	347	384.5	320.3	331		367.1	376.8	386.7	308.7	340.9	338.4	355	350.5	301.1	331.9	335.5
	1.5	344.5	373.1	343.6	363.2	292.3	359.8	363	355.7	394.7	327	332.7		370.2	368.8	398.6	314.4	345.9	340.7	359.6	354.6	306.3	335.1	338.2
	2	357.1	388.2	354.3	374.1	301.9	374.8	370.3	368.6	408.6	336.6	345		382.3	397.5	408.7	323.2	352	353.4	372.2	367.2	313.2	345.9	349.9
	2.5	371.2	406	365	393.8	312.5	385.8	384.3	378.4	424.3	342.2	361.6		396.3	412.2	422.4	332.1	364.7	365	384.3	384.3	325.1	347.6	360.7
	3	376.4	410.5	369.5	397.1	315.3	393.6	388.2	383.2	432.4	346.2	369.8		401.7	416.7	428.5	336.3	367.3	368.9	393.4	380.1	327.1	352.2	361
	3.5	387.6	420.3	376	404.8	327.1	398.7	395.1	393.4	441	353.9	376		407.3	424.7	435.2	341	374.8	376.9	400.3	386.5	332.2	361.4	365.4
	4	400.7	425	379.4	409.9	337.6	413.6	410.2	402.8	451.4	357	385		418.2	433.7	443.3	347.6	378.8	387.7	406.4	395.8	335.6	365.3	374.1

## Sheet: Figure 5-figure supplement 1c
Figure 5-figure supplement 1c
		Elevated Plus Maze results (% time in the open arm)
		Veh	NAC
		13.7802	18.0533
		24.5018	5.82667
		26.9597	0.5561
		15.56	15.2
		27.3045	43.2312
		13.3687	8.58667
		1.53484	18.0533
		12.44	26.7733
		14.2584	20.8533
		23.32	30.8969
		17.7841	43.8267
		20.2	11.8
		11.3556	26.6483
		12.2564	21.2875
		24.98	17.7618
		41.9811	38.5745
		30.316	52.0864
		54.48	51.0199
		32.9813	33.0223
		55.3659	41.7678
		42.1544	41.3545
		53.0863	28.9813
		18.5721	47.2479
			42.0133
			42.2885

## Sheet: Figure 5-figure supplement 1d
Figure 5-figure supplement 1d
	LDB entries to light
	Veh	NAC
	2	2
	1	1
	5	1
	4	1
	2	3
	2	2
	2	1
	1	2

## Sheet: Figure 5-figure supplement 1e
Figure 5-figure supplement 1e
		Open Field results (% time spent in the center)
		Veh	NAC
		0.099993	1.64656
		2.41984	2.72648
		0.819945	1.91987
		2.39657	0.4933
		2.96946	0.978649
		3.48644	0.166815
		0.973087	3.06401
		2.0732	2.96375

## Sheet: Figure 5-figure supplement 1f
Figure 5-figure supplement 1f
	Open Field results (distance (cm))
	Veh	NAC
	3307.87	2954.36
	3045.99	2471.91
	2206.4	1974.83
	2693.05	2582.76
	2584.84	2282.46
	3107.32	1974.76
	2753.68	2838.66
	3437.52	2616.62

[truncated: 5 more sheets: Figure 5-figure supplement 1g, Figure 5-figure supplement 1h, Figure 5-figure supplement 1i, Figure 5-figure supplement 1j, Figure 5-figure supplement 1k]
