# Supplementary material for: Glutathione in the nucleus accumbens regulates motivation to exert reward-incentivized effort
Source: eLife. 2022 Nov 8;11:e77791. doi: 10.7554/eLife.77791 (PMC9642999; doi:10.7554/eLife.77791)
Supplement: Figure 6—source data 1. [file elife-77791-fig6-data1.xlsx]

## Sheet: Figure 6d
Figure 6d
		D1-MSNs, values for cumulative plots						D1-MSNs, mean values per cell
		veh		NAC				veh		NAC
		peak (pA)	IEI (ms)	peak (pA)	IEI (ms)			peak (pA)	IEI (ms)	peak (pA)	IEI (ms)
		6.409	75.9	21.362	193.7			15.41	153.87	16	222.8
		7.935	377.25	13.428	180.3			13.63	120.89	16.2	241.1
		7.935	15	16.785	226.15			10.37	277.73	13.8	117.6
		11.902	34.6	13.428	490.25			9.7	415.34	15.7	73.4
		28.687	528.3	20.447	275.95			10.71	225.25	18.8	101.9
		10.071	25.65	26.855	15.1			11.37	228.47	11.8	363.7
		30.518	121.65	21.667	33.75			11.11	115.58	11.7	467.1
		18.921	86.05	11.597	103.1			14.7	403.83	11.9	122.3
		20.447	248.3	15.869	160.85			8.94	190.78	12	134.2
		17.7	76.1	29.602	330.1			15.28	202.93	9.7	214.8
		9.155	528.15	12.207	102			9.54	133.71	19	149.2
		15.259	53.5	13.123	206.9			15.84	128.42
		14.648	30.75	18.616	649.2
		32.654	62.3	15.259	257.1
		14.954	26.55	7.324	194.1
		18.616	13.4	13.123	300.4
		8.545	129.7	9.155	44.05
		14.038	23	21.667	77.45
		21.362	36.15	14.343	47.85
		13.428	17.4	25.635	380.65
		12.512	31.95	21.973	953.4
		12.207	64.75	21.973	146.9
		17.7	31.3	16.785	731.8
		17.09	117.1	34.485	1.65
		12.817	68.7	41.199	89.35
		7.324	22.2	12.207	508.95
		11.292	23.85	12.817	61.2
		9.155	27.65	12.207	686.45
		21.667	32.6	14.648	113.55
		11.597	74.1	20.752	272.75
		10.376	15.15	19.531	72.4
		7.324	6.9	9.766	918.75
		18.311	87.05	16.479	1078.05
		18.616	61.55	16.785	390.85
		8.85	33.4	10.681	322.4
		10.681	37.4	26.245	312.3
		10.376	30.55	12.207	531.15
		28.381	36.2	19.836	437.45
		11.597	99.05	10.986	1136
		9.766	55.3	11.292	1939.9
		25.635	23.75	21.362	76.2
		11.292	12.05	21.973	332.1
		9.46	19.75	10.986	68.6
		12.817	36.45	12.207	95.35
		14.343	36.45	10.986	129.05
		9.46	53	8.24	314.65
		10.681	26.5	15.869	20.25
		10.376	19.55	9.766	189.25
		8.24	59.95	13.123	192.9
		8.85	33.55	7.629	371.3
		9.46	101.15	17.09	99.1
		11.292	90.85	11.292	370.2
		9.155	84.55	13.733	523
		10.071	17.95	9.46	279.4
		7.935	36.9	18.616	430.4
		11.902	59.1	13.123	84.85
		8.85	47.15	18.921	72.9
		10.681	34.85	13.733	202.3
		10.071	84.15	9.155	199.9
		7.629	27.75	17.395	655.1
		7.935	17.8	30.823	743.75
		6.104	29.95	25.94	77.55
		7.935	135.85	11.902	686.45
		13.123	19	11.902	100.05
		9.46	89.15	15.259	784.25
		7.019	48.05	13.123	27.05
		40.894	43.1	20.142	111.1
		14.038	23.05	13.428	149.2
		6.714	16.5	14.343	101.45
		7.629	19.55	14.343	70.9
		7.019	32.65	9.46	58.45
		7.629	24.15	14.954	115.25
		14.648	22.1	16.785	356.5
		18.616	11.2	14.038	114.9
		19.836	22.55	21.362	28.4
		8.85	59.6	29.907	225.8
		10.986	28.45	14.038	179.6
		23.804	74.7	16.785	270.8
		10.071	48.2	17.7	718.7
		10.071	54.35	12.207	147.85
		12.207	36.25	13.733	555.15
		8.85	22.65	18.616	402.1
		13.428	36.55	14.954	138.85
		8.545	73.1	22.278	652.55
		11.597	74.35	23.804	255.35
		8.24	35.9	21.667	236.2
		40.283	40.9	9.766	172.25
		18.921	237.25	18.921	861.55
		25.635	53.4	19.836	83.85
		20.142	30.75	10.376	382.35
		18.311	26.55	9.155	207.1
		16.785	29.9	19.836	372.15
		9.46	82.3	10.376	503.8
		10.681	20.55	18.311	703
		7.019	86.15	18.311	206.7
		14.954	48	8.24	967.95
		7.324	34.8	11.597	590.4
		7.019	34.6	17.09	321.35
		15.869	107.75	12.207	20
		12.512	67.4	18.005	144.7
		13.428	46.05	32.654	290.6
		14.343	51.15	18.311	461.05
		8.545	19.85	30.823	205.9
		8.24	65.45	11.597	230.45
		7.324	72.75	13.123	61.8
		8.545	93.7	9.155	18.75
		10.681	322.9	12.512	91.05
		9.766	101.7	9.46	99.2
		7.324	27.6	6.714	83.55
		13.123	62.1	19.531	119.4
		9.46	42.6	9.46	371.35
		7.629	96.45	12.817	39.5
		16.785	17.35	11.292	982.8
		10.681	59.45	11.597	174.45
		29.907	79.6	15.869	141.15
		11.597	21.9	17.7	392.85
		14.343	12.6	20.142	492.35
		6.104	45.55	20.447	279.3
		5.188	31.7	18.005	412.5
		15.564	55.85	9.155	111.65
		8.24	99.4	14.038	28.6
		8.85	51.2	23.804	135.75
		18.005	59.8	18.311	24.4
		10.071	64.1	15.564	16.5
		13.428	38.95	10.986	21.8
		8.85	135.8	8.85	21.6
		21.973	23.3	11.597	62.85
		13.123	59.55	14.038	452.9
		13.123	104.95	11.292	21.15
		10.071	34.35	21.057	80.75
		9.46	138.8	8.24	329.95
		30.212	138.9	16.785	260.6
		9.46	43.8	24.414	1027.2
		10.376	14.45	20.142	56.9
		9.46	60.65	11.597	28.45
		18.921	44.5	12.817	109.55
		8.545	55.65	18.616	80.15
		10.986	28.25	10.071	133.05
		19.836	46.85	11.902	65.7
		12.207	40.25	11.292	358.75
		9.46	85	8.24	201.9
		21.667	13.9	13.428	187.3
		10.376	161.1	7.324	684.5
		13.733	75.45	11.902	324.45
		11.597	193.2	14.343	409.6
		15.259	20.35	12.207	543.75
		9.46	63.45	9.155	308.3
		8.545	45.4	12.817	231.85
		17.09	38.9	17.395	139.85
		7.324	60.75	12.817	39.35
		10.681	127.75	12.207	20.3
		11.902	22.75	20.142	52.85
		9.46	32.45	19.531	152.75
		9.155	18.6	26.855	493.65
		9.766	52.3	19.226	833.35
		13.733	21.45	11.902	304.15
		10.681	94.1	10.376	160.9
		14.343	39	16.174	42.45
		10.986	39	14.954	389.3
		10.681	193.85	21.057	49.15
		24.109	137.95	12.207	211.6
		11.292	36.8	13.123	86.25
		12.207	57.95	8.24	551.15
		11.902	33	12.207	54.15
		7.019	73.25	16.479	17.35
		9.46	40.5	21.667	212.1
		14.038	154.1	12.207	47.25
		17.09	24.2	8.85	140.8
		17.395	47.8	11.597	85.95
		11.902	43.2	16.479	226.45
		6.409	79.2	14.954	183.45
		8.24	16.15	16.479	313
		14.648	125.5	14.343	495.2
		16.785	35.35	12.817	62.35
		12.817	25.05	16.479	281.2
		18.005	25.3	14.954	617.6
		9.766	31	19.531	168
		11.292	239.85	8.545	51.9
		16.174	20.95	23.804	103.6
		10.071	70.15	21.362	255.6
		20.142	39.05	16.174	64.7
		15.259	112.95	14.954	200.6
		23.804	56.1	18.616	31.85
		33.875	64.55	16.174	557
		13.428	54.5	18.616	25.6
		8.545	21.3	11.292	173.4
		12.512	43.85	21.057	14.75
		36.011	91.8	12.512	38.85
		11.292	142.05	8.545	26.1
		6.714	244.45	10.986	41.45
		13.733	50.5	10.071	33.3
		22.583	43.65	25.94	242.6
		12.512	37.3	9.155	32.05
		12.207	64.6	9.766	212.45
		22.583	337.15	9.155	206.35
		7.629	154.35	36.011	1207.7
		14.648	181.25	22.278	894.95
		13.733	103.05	21.057	49.2
		11.292	83.35	28.381	95.1
		12.207	240.65	12.207	30.65
		15.564	61.65	6.714	24.15
		7.324	32.05	12.207	84.85
		8.85	17	39.063	139.25
		6.409	90.1	12.207	165.1
		13.733	33.8	17.395	254.65
		7.935	171.45	21.057	92.15
		11.597	328.35	16.785	510.2
		9.766	48.8	31.128	65.55
		8.85	134.8	10.681	90.4
		13.428	22.3	6.104	33.8
		12.207	38.45	8.24	375.75
		21.667	51.95	15.259	136
		8.545	398.9	23.804	82.15
		8.85	101.05	11.597	154.05
		10.071	133.4	11.597	23.3
		8.85	89.3	20.447	511.55
		10.681	85.9	23.804	355.15
		10.376	375.1	10.681	58.05
		8.85	63.6	21.667	155.75
		20.142	114.8	7.629	158
		13.428	128.7	15.869	131.5
		17.395	26.5	14.954	188.45
		15.259	157.7	11.597	175.85
		7.019	88.2	32.349	208.9
		28.992	79.8	8.85	269.2
		19.226	72.95	10.986	211.5
		7.935	152.55	8.545	93.9
		9.155	112.8	9.46	269.1
		16.174	55.7	6.409	643.35
		9.766	30.25	17.7	20.55
		9.766	89.9	11.292	372
		25.024	199.9	19.226	92
		7.324	226.55	7.629	95.05
		8.24	221.95	22.583	575.6
		11.292	269.7	5.798	177.15
		6.714	314.85	7.629	90.95
		12.512	79.05	28.381	127.3
		6.104	95.7	9.46	627.7
		14.954	234.1	18.005	305.2
		11.292	269.1	15.259	53.55
		12.817	71.9	7.324	177.5
		25.33	139.85	31.128	335.2
		10.071	504.55	14.648	283.6
		14.343	219.8	14.648	209
		7.324	85.95	13.428	158.15
		10.986	296.8	8.545	332.05
		14.343	77.7	10.071	29.55
		17.09	142.1	15.259	493.95
		10.376	291.55	20.142	363.1
		12.512	195.4	16.174	170.2
		10.681	192.2	15.869	613.75
		13.428	36.05	73.242	393.8
		14.954	38.8	14.954	244.3
		11.292	356	16.479	93.5
		8.545	73.8	6.409	98.5
		21.362	90.65	11.902	42.1
		8.24	211.4	19.531	451.35
		14.648	242.15	22.583	161.95
		7.019	67.35	15.869	543.45
		18.005	25.2	9.46	481.65
		9.46	111	9.46	43.9
		14.038	32.8	21.362	179.3
		15.869	43.1	25.94	307
		10.681	250.45	12.512	664.6
		11.597	39.2	10.071	9.6
		7.324	78.35	16.174	215.3
		11.902	206.5	8.85	146.1
		7.935	18.9	6.409	552.25
		11.597	105.2	12.207	328.6
		20.752	37.8	41.504	180.2
		10.376	161.05	19.226	35.15
		12.817	9.85	15.869	465.9
		11.902	71.4	7.629	64.85
		10.986	17.15	10.681	438.65
		19.531	41.5	22.583	55
		5.798	46.25	15.259	152.55
		13.123	70.4	6.409	356.85
		16.479	30	23.804	507.5
		23.499	53.7	22.888	255.6
		7.935	36	18.616	164.35
		8.545	77	5.798	38.15
		21.362	55.9	10.376	78.4
		8.545	136.15	18.005	124.6
		8.24	73.25	14.038	372.95
		14.648	120.25	27.161	31.35
		14.343	94.7	12.207	343.25
		7.935	58.55	11.597	139.65
		10.071	39.15	7.629	281.85
		6.104	178.1	16.785	276.65
		13.428	43.9	11.292	131.4
		13.123	73.8	17.7	1101.65
		12.512	90.65	7.019	272.65
		7.935	222.85	40.588	89.3
		7.629	88.85	15.564	15.15
		10.681	43.15	14.648	277.95
		20.142	366.75	5.798	184.05
		12.817	175.9	10.986	265.45
		9.766	105.55	22.583	35.2
		9.155	58.75	9.46	98.15
		9.155	225.05	10.986	335.55
		12.512	33.3	5.798	272.45
		12.207	82.45	7.019	53.9
		11.292	213.15	10.071	93.5
		24.719	0.25	36.316	196.75
		12.207	194.9	25.33	382.2
		8.545	192.5	15.564	730.75
		7.019	76.85	15.259	15.05
		10.376	46.55	8.24	178.4
		6.104	54.75	24.414	199.4
		11.292	133.1	22.278	131.3
		12.207	154.8	18.616	429.15
		21.973	27.15	21.057	236.15
		8.545	361.8	10.071	401
		19.531	75.2	27.771	131.6
		7.629	23.2	14.954	165
		21.973	31.1	6.104	68.75
		9.766	40.7	10.376	501.55
		6.409	109.15	10.681	102.2
		7.019	96.45	15.564	111.6
		33.875	332.7	28.076	234
		10.071	5.75	6.409	197.3
		14.648	47.55	11.597	339.25
		10.986	131.7	13.123	168.45
		18.311	152	7.019	208.6
		8.545	20	9.155	256.2
		16.174	78.1	14.038	79.75
		14.038	173.05	11.597	58.1
		18.616	80.5	22.278	275.1
		17.09	241	11.292	563.2
		6.104	86.2	8.85	108.2
		28.381	230.6	9.46	585.6
		13.123	208.55	21.057	164.8
		12.817	41.2	22.278	14.65
		19.531	28.7	26.855	50.5
		15.869	221.95	17.7	18.6
		8.24	161.8	6.714	161.65
		11.902	26.05	11.902	178.2
		9.46	32.95	16.479	492.45
		16.479	240.25	14.648	23.2
		15.869	133	14.038	1293.25
		15.869	110.3	14.648	22.2
		12.817	86.45	21.667	164.15
		11.292	44.85	37.537	163.15
		16.785	193	8.24	65.65
		10.376	37.15	20.447	515.2
		17.395	113.4	15.869	50.35
		7.324	43	20.447	94.05
		18.921	162.4	8.85	47.95
		9.766	32.15	34.79	189.15
		11.902	159.6	13.428	57.55
		9.766	40.6	24.109	1416.4
		10.071	479.35	9.155	2233.15
		22.278	69.4	20.142	62.85
		8.545	233.6	32.349	348.95
		9.46	117.45	12.817	421.1
		7.629	84.45	23.499	578.8
		10.681	100.2	23.804	226.2
		16.479	0.5	21.973	50.15
		26.855	87.1	11.292	28.9
		14.954	18.3	16.785	25.35
		8.24	230.65	14.343	223.1
		8.85	147.9	28.076	413.4
		16.174	374.7	12.207	0.05
		10.376	25.25	12.207	227.65
		9.46	25.1	32.349	163.3
		17.7	160.65	9.766	509.6
		13.123	303.65	9.46	102.7
		8.85	174.6	18.921	297.55
		7.629	32.7	10.681	76.55
		11.292	10.55	7.019	260.75
		12.817	251.75	20.447	382.25
		10.071	192.15	27.161	351.4
		5.798	229.65	12.817	113.45
		14.038	207.65	8.24	190.6
		20.752	152.75	23.193	433.5
		21.057	147.1	18.616	31.35
		8.85	91.65	15.564	189.95
		11.902	45.6	9.155	31.9
		20.752	287.55	10.681	113.6
		10.986	198.7	7.324	121.15
		14.954	377.8	21.667	127.55
		9.46	570.75	8.24	637.55
		8.24	335.6	10.681	306.45
		6.714	28.1	8.24	273.85
		9.766	19.7	13.123	186.45
		14.343	100.4	33.569	220.05
		21.667	22.4	15.869	47.45
		8.85	32.2	35.095	45.75
		10.376	112.65	11.292	436.15
		20.142	44.05	11.902	60.95
		9.46	156.75	7.935	131.2
		9.46	30.7	20.752	134.35
		9.766	32.1	7.019	116.5
		10.681	14.75	5.493	33.25
		10.071	175.2	8.85	8.75
		11.902	110.95	25.94	346.05
		22.888	137.4	17.09	462.35
		12.207	91.05	11.292	358.05
		6.104	74.35	9.46	511.8
		13.733	90.9	21.362	152.5
		9.766	307.55	11.597	103.5
		14.954	88	5.798	29.55
		9.155	321.3	7.324	117.95
		5.798	170.75	11.902	197.4
		15.869	323.85	13.123	44.1
		8.85	129.65	14.343	30
		6.104	212.65	9.46	111.05
		8.85	58.7	11.597	155.9
		5.188	596.25	8.85	259.9
		7.629	104.45	7.324	117.2
		17.09	189.7	29.602	234.5
		9.46	169.65	6.104	83.65
		15.869	218.1	9.46	164.2
		7.935	46.6	5.493	169.75
		17.395	735.75	7.324	101.25
		12.207	91.4	5.798	64.1
		7.629	234.5	8.545	120.1
		8.24	157.2	6.714	71.9
		6.714	81.15	24.109	38.15
		7.935	497.95	14.343	62.7
		10.071	725.9	10.986	127.6
		13.428	209.5	17.7	190.65
		4.883	181.8	17.395	493.75
		7.019	150.1	16.785	63.75
		8.24	320.45	5.798	170.85
		9.766	572.75	11.902	239.35
		9.766	141.6	13.123	176.75
		6.714	409.1	7.629	63.4
		14.343	1015.75	9.766	133.65
		10.071	167.05	10.681	54.95
		5.798	32.6	12.207	86.45
		9.155	47.4	7.935	97.55
		11.902	421	23.804	98.55
		9.766	182.9	8.24	207.5
		9.766	24.1	16.174	79.1
		8.545	406.4	7.019	147.2
		7.629	36.05	8.545	29.15
		9.766	82.1	7.935	44.85
		26.855	115.4	9.155	27.85
		5.493	141.65	19.226	45.75
		7.935	454.85	15.259	352.6
		9.766	28	7.629	165.65
		14.038	507.55	7.019	61.5
		10.071	52.6	7.019	194.45
		10.071	107.55	12.512	114.35
		5.188	73.8	12.512	347.85
		13.733	410.05	12.207	113.15
		6.409	89.6	9.46	93.15
		19.226	133.15	51.27	204.3
		6.409	118.3	18.005	229.95
		7.019	326.25	7.019	211.1
		8.545	482.5	7.019	65.7
		13.733	130.95	12.512	10.45
		8.85	22.65	21.973	36.7
		7.629	201.7	7.324	23.25
		6.104	32.25	10.986	46.65
		8.24	29.25	18.005	129.1
		7.629	278.9	7.629	22.55
		9.155	819	6.104	447.5
		15.259	38.8	21.362	53.55
		11.292	34.85	9.46	382.4
		8.545	372.4	14.648	74.6
		12.512	215	10.376	45.7
		5.798	228.35	20.447	253.75
		5.798	338.75	10.681	441.6
		5.493	363.2	11.902	36.75
		7.019	323.75	11.597	71.9
		14.038	39.85	8.24	177.75
		10.071	71.75	14.954	163.45
		13.428	75.6	7.935	178.7
		11.902	504.9	9.766	261.5
		7.324	122.6	9.46	165.8
		19.226	29.4	6.409	75.85
		4.578	284.65	9.766	17.85
		10.681	475	9.766	145.55
		7.629	139.3	8.24	128.15
		18.005	82.6	7.019	171.5
		6.714	266.6	29.602	65.8
		6.409	23	10.986	29.5
		6.714	83.6	8.85	74.85
		7.324	60.7	11.902	135.8
		11.597	78.7	28.381	149.85
		8.24	170.9	18.616	312.65
		7.935	311.85	14.648	228.6
		10.376	119.7	10.681	32.9
		18.616	219.8	7.629	56.8
		7.935	60.35	9.46	255.1
		19.836	343.3	15.259	62.9
		5.798	70.85	16.174	58.55
		9.155	55.15	11.292	211.85
		7.324	105.35	10.681	141.7
		7.935	646.15	10.681	42.3
		6.409	219.4	20.752	611.8
		7.629	238.85	7.935	199.05
		13.733	131.15	22.278	97.1
		9.766	534.1	27.466	65.65
		14.038	336.95	11.292	52.45
		12.207	531.3	12.207	33.85
		10.986	1791.1	8.24	52.5
		8.545	178.6	8.545	104.1
		7.935	25.3	15.564	42.95
		9.766	293	11.902	490.2
		8.24	69.85	9.155	89.25
		9.155	368.65	11.597	199.25
		8.545	656.9	14.038	58.7
		9.46	165.15	15.564	98.8
		7.629	525.45	11.292	300.7
		12.817	105.35	8.545	33.4
		8.545	15.85	6.409	38.5
		7.019	767.25	14.954	51
		7.019	237.4	11.292	54.35
		14.038	330.85	6.409	82.8
		5.493	46.7	14.038	14.3
		18.921	155.7	10.986	215.95
		13.123	116.75	10.376	334.15
		10.986	413.55	16.479	74.1
		8.545	332.5	8.85	148.6
		5.798	126.75	17.7	148.9
		10.681	49.05	18.616	98.55
		11.902	82.7	6.714	70.65
		10.071	199.4	16.479	75.35
		8.85	267.25	7.935	116.6
		8.545	113.3	6.409	17.8
		12.207	104.4	10.681	247.95
		7.324	1093.8	11.292	101.45
		9.46	54.1	11.597	116.25
		7.324	235.05	17.7	134.05
		7.324	52.05	21.057	19.85
		12.207	105.25	8.545	67.3
		11.597	172.65	11.902	51.25
		12.817	341.6	9.46	88.1
		11.292	37.05	13.428	58.6
		7.935	115.95	7.935	103.5
		8.24	463.95	23.193	263.25
		7.324	164.5	17.09	38.2
		5.188	45.75	10.986	65.55
		8.545	388.3	19.226	169.15
		8.24	418.7	23.193	24.85
		9.155	206.5	7.935	164.2
		6.104	192.15	11.902	5.2
		26.55	779.75	19.836	382.95
		11.292	16.8	12.817	12.1
		7.629	32.1	14.954	79.9
		7.019	29.65	18.311	68.75
		8.545	81.55	6.714	102.1
		10.681	333.55	25.94	129.25
		11.902	315.95	32.959	30.15
		24.719	351.15	8.85	38.45
		10.376	415.15	10.376	121
		7.935	593.85	18.005	151.4
		7.324	119.6	18.616	16.85
		4.883	381.3	18.311	86.85
		12.512	24.15	9.766	237.45
		14.648	490.3	5.188	35.3
		10.681	58.5	23.499	266.1
		7.629	26.1	7.935	154.35
		11.597	342.25	7.019	10.05
		4.883	41.3	15.564	240.6
		21.667	90.25	21.057	33.65
		11.902	1049.65	6.714	91.1
		16.785	540.4	7.324	196.5
		7.935	71.6	8.85	327.75
		7.629	1170.85	18.921	24.3
		7.324	91.9	8.85	29.45
		6.409	277.35	8.85	61.85
		5.798	152.75	18.616	47.15
		7.019	519.4	13.123	107.35
		7.629	38.15	10.681	126.7
		14.648	536.3	21.362	105.3
		11.597	324.6	15.564	36
		11.902	67.4	11.597	90.35
		9.46	18.25	15.869	61.4
		8.85	95.8	33.875	72.3
		9.46	73.5	15.259	163.45
		13.428	398.75	13.428	37.45
		10.986	907.2	6.104	26.2
		6.714	196	17.09	141.55
		11.902	378.8	7.935	21.3
		7.324	77.9	26.55	447.75
		7.019	37.4	16.174	16.35
		10.986	253.65	8.545	194.65
		25.94	482.4	36.621	114.65
		6.714	725.5	7.629	278
		18.921	72.45	13.733	65.15
		12.817	208.45	14.343	59.2
		7.019	102.95	19.226	40.35
		8.85	452.25	7.324	97.1
		7.935	749.6	19.836	102.85
		10.986	104.9	14.954	222.05
		19.226	101.9	21.057	110.4
		7.324	63.75	8.85	17.65
		14.648	110.65	17.09	149.2
		8.85	545.3	6.409	142.15
		11.292	682.75	6.409	66.2
		9.766	56	15.259	25.05
		8.24	1137.45	10.376	97.7
		10.071	218.05	6.409	63.85
		12.207	385.25	12.207	126.8
		14.343	1494.95	15.259	84.65
		18.921	89.3	14.343	151.25
		5.798	1227.5	9.46	60.55
		6.104	2071.15	13.733	35.4
		10.681	357.45	9.46	205.05
		14.343	1413.8	13.733	43.65
		4.578	400.65	7.019	49.25
		9.155	68.2	12.512	133.05
		10.681	256.1	6.104	76.75
		8.545	563.85	11.292	101.6
		7.324	573.4	13.733	137.65
		6.409	1238.2	8.85	42.65
		9.766	69.1	12.512	83.7
		7.019	931.3	37.231	102.45
		16.785	493.95	10.071	25.85
		25.33	1930.25	7.629	13.25
		9.155	71.95	7.324	128.35
		9.155	229.7	11.597	107.25
		10.681	925.3	39.673	31.6
		9.46	1031.75	17.09	182.4
		17.7	1702.25	7.935	26.05
		6.104	240.25	10.986	42
		7.629	682.85	8.24	43.1
		17.7	324.2	27.161	22.45
		8.545	446.4	13.428	206.9
		7.324	626.35	16.479	142.05
		7.935	292.7	7.019	26.65
		9.46	671.75	13.123	51.1
		8.85	438.9	7.019	354.35
		7.019	78.55	11.597	104.4
		8.545	482.05	10.071	22.55
		13.428	55.2	17.7	107.8
		7.019	1085.35	9.46	81.95
		13.428	71.5	15.564	26.05
		9.766	383.35	6.104	387.8
		6.104	593.2	15.564	5.55
		9.46	192.6	15.564	26.85
		12.207	25.25	16.174	27.5
		8.85	166.45	11.902	50.4
		7.324	120.1	10.681	76.85
		7.019	85.1	14.954	29.45
		8.24	179.55	13.733	52.95
		21.667	884.15	9.766	65
		13.428	119.7	13.733	175.2
		7.629	250.3	10.681	22.2
		10.071	565.4	10.681	91.85
		19.226	160.95	13.123	104.7
		6.714	32.25	13.733	12.15
		8.545	979.8	11.902	164.15
		10.681	1402.4	10.681	77.15
		11.292	205	24.414	46.05
		7.629	545.6	17.395	169.5
		10.071	122.2	14.343	220.95
		7.324	959.05	12.207	88.45
		10.681	352.95	21.667	23.15
		6.104	257.9	19.531	5.65
		6.409	448.1	14.343	33.6
		8.545	32.45	31.128	41.3
		7.935	175.6	26.855	32.85
		11.292	179.2	25.94	57.4
		8.24	143.9	25.024	116.9
		9.155	60.55	13.733	48.95
		13.428	768.9	7.935	19.75
		10.986	53.4	11.292	75.4
		11.292	291.5	11.902	20.7
		9.155	81.85	10.681	28.45
		7.935	1104	19.226	100.1
		8.545	716.35	26.245	30.6
		10.681	937.55	8.24	54.55
		7.935	920.4	7.935	110.55
		8.545	275	13.123	35.9
		8.85	611.4	7.324	54.15
		11.902	377.25	11.902	15
		7.629	39.55	14.648	251.15
		6.409	1276.3	16.174	33.8
		14.038	86.35	18.616	50.45
		8.545	24	19.226	43.45
		9.766	395.25	22.278	141.85
		7.629	644.2	12.207	125.55
		7.019	270.6	10.376	39.15
		9.766	121.35	45.776	52.3
		7.629	251	12.512	61.75
		10.071	108.5	10.376	41.55
		7.324	836.15	12.207	25.9
		8.545	664.45	26.855	79.5
		6.714	229	17.09	10.35
		9.155	426.2	22.888	55.1
		9.766	428.35	25.635	230.1
		8.545	1038.45	12.207	165.6
		10.376	810.3	15.869	164.8
		6.409	275.95	11.902	129.5
		12.207	183.6	13.123	27.45
		6.714	51.15	21.973	91.7
		15.564	25.8	6.104	25.8
		11.902	179.75	14.343	38.7
		10.376	196.5	15.564	37.9
		6.409	135.4	18.921	23.35
		11.597	1572.7	10.071	62.7
		10.071	137.25	7.935	12.95
		4.578	1518	18.005	44.6
		10.681	1354.8	14.038	63.55
		8.24	264.8	18.311	43.65
		9.766	153.75	24.719	65.75
		9.766	187.15	10.376	212.45
		10.071	394.8	7.324	32.35
		8.545	66.9	9.46	134.4
		6.409	998.35	19.836	115.6
		12.817	83.8	16.479	34.7
		12.207	30.55	20.447	135.2
		7.629	61.9	13.733	69.9
		26.245	618.4	7.935	135.7
		10.376	50.2	9.155	79.65
		6.104	414.45	14.648	76.6
		10.071	329.2	21.057	40.2
		14.038	143.1	9.766	102.95
		7.629	272.9	31.433	78.2
		7.935	496.6	9.766	119.2
		11.597	1957.85	22.583	68.1
		18.616	855	8.24	73.65
		7.019	82.25	16.174	28.8
		8.545	423.65	26.245	142.8
		8.85	543.25	10.986	67.65
		8.24	206.4	10.681	67.4
		5.798	351.55	20.752	127.3
		9.155	171.4	8.545	150.4
		9.46	84.1	19.836	109.3
		8.85	89.3	11.902	9.2
		5.798	163.05	14.343	222.4
		30.518	59.8	11.597	352.15
		9.766	1341.8	18.921	24.65
		8.85	1527.6	17.09	18
		8.545	475.45	28.381	38.3
		8.24	378.65	35.706	20.5
		8.85	432.15	12.512	247.15
		13.428	196.75	10.071	14.4
		9.766	35.75	9.155	11.35
		11.292	1063.2	9.155	99.6
		17.395	304.85	38.452	56.55
		15.869	645.7	16.479	102.2
		6.714	877.55	10.376	27.7
		8.545	180.6	7.324	128.8
		11.292	1016.5	20.447	106.95
		6.104	116.15	11.292	174.3
		15.869	211.35	13.733	35.3
		10.681	181.4	12.512	78.35
		11.902	113.15	17.7	276.1
		7.324	672.55	17.09	26.05
		9.46	1719.7	12.817	65.25
		20.447	79.6	22.278	129.9
		9.155	210.5	16.174	20.9
		9.155	637.95	27.771	65.05
		13.733	29	59.204	38.75
		10.986	637.9	21.057	73.15
		8.85	551	26.245	56.95
		10.376	665.55	10.681	134
		8.545	60.95	35.4	441.05
		15.259	98.05	16.479	22.65
		5.798	267	10.071	115.95
		8.545	487.1	31.433	67.1
		11.597	424.9	25.024	260.25
		8.24	311.7	8.545	110.95
		6.409	40.25	12.207	20
		13.733	311.5	30.823	100.65
		7.935	516.45	17.395	54.8
		10.376	715.25	9.155	134.45
		11.292	535.85	14.954	25.65
		7.935	140	11.902	39.3
		7.324	345.2	10.681	30
		6.409	649.4	10.376	138.75
		6.104	994.95	8.545	35.9
		6.104	1117.1	15.869	7.2
		5.493	295.35	23.804	48.5
		6.714	1302.05	18.311	119.05
		29.602	1407.85	13.123	22
		7.324	104.15	7.629	33.05
		6.409	69.45	10.986	70.05
		7.324	99.35	18.005	41.7
		8.85	504.6	15.564	59.6
		10.681	138.3	18.311	62.35
		14.343	187.3	12.512	93.75
		10.376	53.1	12.207	273.95
		9.155	63.2	8.24	106.75
		7.324	33.05	11.902	193.5
		7.935	261.95	32.349	17.5
		6.714	661.6	7.629	83.05
		9.46	1804.6	12.817	69.75
		6.409	261.35	17.395	14.5
		12.817	215.2	14.343	172.85
		6.409	370.05	24.719	28.2
		14.648	583.95	22.583	175.8
		9.46	415.35	17.395	111.25
		9.766	79.75	14.954	37.85
		19.531	214.9	21.057	183.95
		22.278	486.85	7.324	98.05
		8.85	563.35	10.376	19.8
		8.545	41.6	7.019	148.05
		6.409	34.05	16.174	42.7
		6.409	429.15	24.719	74.65
		7.324	495.85	15.259	71.85
		16.174	642.5	7.324	259
		10.986	377.9	16.174	234.5
		8.24	680	16.174	40.05
		17.395	219.35	27.161	21.8
		6.409	395.9	25.024	35.9
		6.104	199.65	6.104	206.9
		10.681	81.5	14.648	27.5
		15.259	222.15	9.46	10.65
		6.409	410	12.512	89.6
		4.883	990.85	26.245	84.45
		14.648	678.9	12.817	52.7
		15.564	234.6	7.629	178.7
		5.188	206.8	19.836	49.9
		10.681	272.7	11.292	66.05
		5.188	279.15	11.902	21.45
		10.376	212.45	21.667	62.25
		6.104	19.05	16.174	450.3
		7.019	61.95	11.902	69.85
		16.479	46.75	13.123	171.8
		7.629	43.55	16.785	118.75
		10.376	29.35	8.24	81.6
		6.104	470.4	18.311	26.8
		13.123	28.5	9.766	23.7
		11.902	13.6	11.597	40.15
		9.155	23.75	21.667	57.45
		7.019	61.35	21.362	128.45
		12.817	106.8	14.954	148.95
		9.46	1193.25	17.7	47.1
		7.324	534.85	14.038	63.45
		11.902	293.25	16.174	28.85
		11.597	33.45	34.485	52.2
		8.85	108.2	15.259	56.7
		7.935	186.4	22.278	30.6
		19.226	165.65	15.869	128.6
		13.428	273.45	10.986	65.85
		7.935	46.2	17.395	43.85
		9.46	213.15	28.687	26.05
		7.019	24.8	17.395	184.05
		6.104	316.4	8.24	147.65
		5.798	166.55	27.466	25.35
		13.123	83.65	13.428	12.2
		10.071	253.75	9.155	48.75
		24.109	52.4	11.292	26.8
		5.188	240.65	22.888	37.4
		20.447	84.45	20.142	64.4
		18.005	181	22.888	49.8
		10.376	123.4	15.564	73.2
		5.798	76	18.311	9.2
		4.883	1201.2	18.921	15.5
		6.409	336.6	5.493	115.1
		6.714	169.35	31.738	111.9
		7.324	842.8	10.071	260.35
		10.071	451.9	26.855	10.25
		6.714	245.55	9.155	98.65
		5.798	304.25	22.888	57.9
		14.343	794.5	17.09	13.25
		6.409	312.7	11.597	153.6
		7.629	68.4	10.681	27.65
		14.648	50.35	20.142	526.5
		10.376	322.25	10.071	41.8
		19.531	143	29.297	20.6
		6.104	470.9	14.648	26.6
		9.155	668.25	9.766	20.55
		9.155	381.35	19.836	6.4
		16.174	633.05	16.785	85.5
		9.155	152.5	19.531	20.8
		14.343	207.65	18.921	19.95
		7.935	28.2	15.869	38.2
		12.512	918.2	21.973	39.3
		15.564	176.7	32.654	28.2
		3.967	455.9	9.155	57.75
		5.798	351.25	11.597	232
		19.226	308.3	41.504	18.15
		12.207	58.9	9.155	262.9
		10.376	628.45	10.986	130.05
		8.85	129.7	12.207	191
		6.714	119.2	27.161	36.65
		10.376	15.6	15.259	239.6
		10.376	343.4	11.597	14.85
		11.902	90.35	19.531	226.05
		7.324	1010.45	17.09	182.8
		5.798	313.85	14.343	82
		16.479	306.35	22.278	165.55
		7.629	450.85	7.935	18.95
		6.714	292.15	18.616	72.95
		10.376	417.8	16.174	75.95
		13.123	212.45	10.986	335.1
		5.188	145.6	18.311	18.65
		12.207	317.95	14.954	361.1
		6.409	212.4	27.771	74.8
		5.188	84.9	16.479	28.4
		7.629	491.6	11.597	148
		9.766	135.55	21.362	167.55
		12.512	64.35	16.174	105.75
		9.155	85.5	9.766	215.85
		19.836	629.3	9.766	24.05
		7.019	272.05	23.499	27
		7.935	426.6	18.921	24.9
		12.817	115.05	21.362	151.95
		9.46	82.4	10.986	271.6
		9.46	318.75	16.479	27.35
		10.681	27.15	15.869	58.25
		6.409	146.45	30.212	25.55
		7.629	35.65	32.043	45.6
		6.409	142.95	14.954	20.95
		10.681	38.95	15.869	376.95
		11.292	1152.8	15.259	210.6
		8.85	307	19.531	68
		8.24	45.55	11.597	43.35
		6.409	292.25	14.343	58.45
		8.85	66.2	23.804	78.35
		6.409	208.15	16.174	14.85
		10.986	88.25	18.616	58.6
		14.038	370.2	12.207	86.35
		6.714	128.15	15.259	28.15
		24.719	37.85	15.259	117.35
		10.986	177.05	15.259	29.45
		9.155	32.85	26.245	48.05
		11.597	140.55	36.621	192.1
		9.766	271.45	19.836	101
		10.071	207.95	9.766	33.25
		9.155	214	21.973	46.15
		18.616	111.15	9.46	33.1
		12.512	314.3	11.292	48.25
		24.719	107.4	13.123	384.2
		7.629	223.75	12.512	49.55
		7.629	476.15	21.667	36.65
		6.104	178.15	10.986	59.7
		4.883	180.4	18.616	135.35
		6.714	207.4	44.861	109.3
		14.954	50.25	11.902	39.25
		7.019	51.55	15.564	95.95
		10.376	432.05	25.94	24.7
		8.85	48.5	14.038	90.2
		14.038	217.1	15.564	54.55
		6.409	147.6	11.292	76.85
		7.019	44.9	39.063	44.7
		8.545	92	61.951	95.6
		8.545	65.45	28.076	102.55
		12.207	269.45	11.902	218.4
		10.071	248.5	7.935	120.6
		7.324	188.1	22.888	43.9
		14.343	28.4	13.428	191.65
		8.85	291.85	10.681	67.65
		14.648	50.25	25.635	98.55
		7.935	293.9	27.466	378.75
		7.019	1060.8	12.817	94.45
		9.766	55.5	16.174	25.15
		6.714	32.1	28.076	184.2
		5.798	21	7.935	25.55
		8.85	142.95	14.648	111.45
		10.376	9.15	14.038	71.05
		9.766	318.4	9.155	43.55
		7.935	29.15	6.409	43.15
		7.629	260.9	16.174	28.95
		10.681	45.1	14.038	14.1
		10.986	227.6	10.681	265.9
		8.545	63	10.681	122.55
		4.883	736.85	15.259	27.5
		20.752	70.15	16.785	56.65
		22.888	52.65	16.174	189.35
		8.85	194.85	17.7	191.4
		6.104	10.35	29.907	94.35
		8.24	220.25	15.259	17.65
		6.714	19.8	9.766	103.9
		29.907	617.55	33.875	182.35
		19.226	394.15	10.071	14.7
		8.85	131.2	9.46	258.3
		7.019	12.1	20.447	24.65
		33.875	43.25	24.414	123.25
		7.935	219.9	36.316	196.25
		8.24	128.55	14.954	41.3
		17.09	45.8	13.123	33.25
		14.648	95.9	14.954	46.05
		18.005	36.85	25.33	57.35
		10.376	367.1	12.207	56.55
		7.935	38.75	12.512	4.1
		7.935	350.4	17.395	54.1
		9.766	15.85	7.935	101.95
		13.428	67.5	22.278	133.1
		8.85	146	21.667	265.3
		5.188	60.3	11.902	194.95
		4.883	550.8	28.992	80.6
		22.278	119.15	25.024	44.1
		7.019	142.35	36.316	249.15
		5.493	173.25	7.324	61.15
		8.85	51	19.836	93.7
		10.986	460.65	20.752	39.7
		10.376	13.9	11.597	38.4
		14.954	322.1	24.414	23.2
		4.883	144.6	9.766	30.25
		12.207	283.35	14.954	46.75
		14.648	159.15	16.174	223.15
		5.493	60.8	24.414	167.65
		12.817	11	24.414	24.2
		7.019	321.8	8.24	139.35
		15.869	272.35	9.46	101.7
		8.24	184.95	11.292	81.2
		10.376	92.25	12.207	16.1
		13.428	82.3	14.343	43.65
		8.85	698.65	15.259	59.75
		13.428	77.35	14.038	46.05
		15.259	55.6	26.245	110.95
		13.123	120.9	17.7	58.75
		9.766	1196.7	9.46	493.75
		11.902	114.1	20.447	409.5
		7.324	93.85	16.479	1006.45
		14.038	555.65	10.376	27.75
		18.616	528.5	11.902	457.4
		18.311	393.35	15.259	565.2
		9.46	326.45	14.954	465.45
		5.493	70.65	15.564	3056.75
		18.311	150.75	11.597	493.7
		10.681	299.45	13.428	379.1
		7.935	1310.25	10.071	207.55
		9.155	111.25	12.207	1396.1
		7.629	342.85	19.531	756.15
		12.512	424.35	18.616	3705.25
		17.09	425.25	15.259	361.25
		18.311	99.6	11.292	212.15
		11.597	416.6	13.428	438.2
		7.935	1094.9	9.155	171.8
		9.766	401.65	18.311	456.35
		8.85	30.05	10.376	1345.8
		11.292	413.1	7.324	285.85
		14.648	413.5	28.381	206.2
		6.409	26.75	9.155	536.8
		8.85	55	10.071	767.75
		34.18	1063.15	8.85	169.75
		9.46	248.4	11.902	648.05
		36.926	248.7	17.09	118.8
		16.174	197.65	13.733	453.35
		35.4	496.75	10.376	388.55
		10.071	138.9	7.629	913.95
		15.564	57.5	16.174	105.65
		8.545	260.3	7.935	21.3
		9.766	50.65	14.343	222.8
		9.155	582.65	7.629	248.25
		25.33	384.35	15.869	658.3
		12.817	101	9.766	379.55
		31.433	1500.15	10.071	633.55
		7.324	530.4	14.038	32.5
		24.719	158.2	9.155	567.4
		12.817	35.45	18.005	107.45
		18.616	588.3	10.986	518
		17.7	86.2	16.785	714.85
		14.954	474.8	9.766	1108.45
		11.902	251.95	9.766	875.15
		12.817	394.15	8.24	259.9
		12.817	128.85	13.733	883
		6.104	435.3	8.85	243.1
		11.292	351.8	21.362	106.55
		10.071	294.15	7.019	481.3
		18.005	437.85	14.648	48.95
		7.324	992.45	11.292	485.45
		21.667	41.4	11.597	147.8
		10.376	43.65	12.207	699.25
		10.681	998.6	7.019	737.8
		6.104	474.1	15.869	602.45
		17.395	96.65	10.986	684.05
		15.259	175.15	14.954	107.65
		8.24	625	13.123	268.15
		30.823	734.5	8.24	270.45
		13.733	181.35	12.207	794.55
		8.85	176.15	9.766	116.1
		10.376	164.9	24.109	55.3
		5.493	527.1	6.714	775.55
		12.512	177.55	23.804	2160.6
		10.681	134.65	8.24	371.2
		21.362	21.35	7.935	1380.35
		15.564	267.1	7.019	416.1
		25.635	748.15	7.324	82.25
		7.935	225.55	9.766	49.4
		12.817	403.8	7.324	26.4
		7.935	459.55	12.207	376.55
		7.629	1083	12.512	764.75
		11.902	157.5	15.259	819.75
		10.986	72.55	10.681	179.1
		7.629	38.65	7.019	238.75
		6.714	207.55	20.447	28.5
		12.817	39.4	10.681	1057.45
		7.629	139.25	12.207	98
		12.512	84.8	9.766	62.35
		8.24	398.7	10.681	22.9
		25.024	391.5	13.733	63.85
		15.869	292.25	6.409	511.65
		7.935	35.25	12.817	550.6
		25.94	323.7	19.836	42.25
		16.174	1528.25	11.597	52.1
		14.343	164.65	15.564	119.1
		13.733	58.7	8.85	206.75
		14.954	214.05	9.766	17.8
		9.155	317.25	11.902	1772.6
		22.583	180.75	7.935	31.3
		7.019	685.95	17.395	322.75
		4.883	587.85	10.376	178.1
		7.324	51.1	12.817	83
		11.292	170.25	13.733	492.6
		15.869	162.85	7.019	194.2
		6.104	201.85	9.155	101.25
		10.681	203.15	9.155	211.35
		20.142	573.35	8.85	389.25
		6.409	245.15	8.545	403.8
		6.409	331.1	12.207	180
		8.545	355.9	7.935	254.3
		8.85	22.75	11.292	306.85
		6.409	576.25	11.292	161.6
		11.597	377.2	19.531	1622.85
		14.648	569.55	19.226	362.25
		9.46	782.4	27.161	630.8
		9.766	84.6	8.85	117.2
		13.123	41.8	12.207	456.25
		5.798	183.9	14.343	154
		8.545	19.85	8.545	474.4
		7.935	162.7	7.629	382.15
		10.376	98.8	7.935	85.75
		8.85	260.8	12.207	66.2
		5.493	658.2	7.935	340.9
		15.564	173.95	15.259	162.25
		14.648	228.3	10.071	77.4
		19.836	191.7	11.902	101.85
		12.817	113.65	15.564	346.8
		8.24	302.45	7.629	135.5
		9.46	198.7	6.714	371.5
		10.986	158.8	11.902	300.9
		8.545	698.4	7.935	90.3
		16.785	29.65	7.324	410.25
		13.123	106.8	11.902	491.95
		7.935	758.7	11.292	32.55
		10.071	301.35	19.226	129.55
		19.836	186.15	7.629	8.85
		9.766	363.2	8.85	180.65
		15.259	38.7	13.123	236.8
		7.935	128.45	8.24	988.35
		7.935	166.25	7.324	441.8
		11.292	488.4	17.395	613
		5.188	198.7	9.46	59.65
		17.7	605.75	11.597	1143.7
		9.155	194.4	9.766	131.9
		7.629	1365.8	6.409	34.25
		16.785	29.05	18.921	228.15
		11.597	205.65	15.259	133.6
		7.935	225.35	12.512	632.4
		10.376	155.4	9.155	434.6
		7.019	268.15	11.902	215.35
		7.324	175.05	21.057	787.65
		8.545	1238.9	17.09	48.15
		13.733	122.65	17.09	184.55
		16.174	64.05	6.409	908.25
		23.193	1267.25	24.719	227.85
		14.648	0.1	10.376	500.35
		14.343	547.55	13.733	1130.95
		6.714	617.55	7.324	249.9
		9.766	1003.5	17.09	150
		12.512	1152.05	7.019	116.45
		13.733	142.5	7.935	232.7
		5.493	131.8	14.038	442.7
		9.155	426.15	9.766	226.25
		7.629	618.65	10.376	49.3
		7.935	297.15	12.512	213.6
		12.207	151.2	21.057	363.9
		7.935	111.1	14.038	123.85
		25.635	506.7	9.766	421.3
		9.46	418.05	12.512	275.1
		6.104	24.65	14.038	317.6
		12.207	485.95	7.629	35.45
		13.733	150.5	12.817	105.25
		10.071	283.55	21.362	310.25
		5.188	235.4	14.038	517.4
		21.362	342.2	11.597	263.8
		9.155	40.35	12.512	479.2
		8.545	452.3	12.817	480.1
		6.409	1335.95	26.55	1249.7
		13.123	183.8	11.597	352.25
		12.817	27.35	7.324	114.65
		8.85	101.6	22.888	405.4
		8.85	1636.55	8.545	1400.8
		9.766	119.55	6.409	848.45
		18.921	139.65	12.207	30.2
		19.226	567	9.155	657.85
		12.207	165.6	10.071	147.65
		7.019	82.75	8.545	389.4
		10.071	453.85	9.46	100.2
		9.766	483.5	15.564	800.3
		9.46	273.6	19.836	124.65
		11.597	530.9	8.545	186.4
		14.648	40.55	12.207	65.35
		14.343	537.25	7.324	470.45
		24.109	35.65	19.836	167.15
		6.714	487.35	25.33	203.5
		14.648	930.35	7.324	223.2
		4.578	462.1	9.766	61.2
		9.766	290.45	7.629	287.1
		12.512	149.8	12.817	24.5
		12.207	134.35	9.46	38.25
		13.428	215.55	9.155	95.5
		6.104	39.4	24.109	678.5
		15.259	356.2	8.545	112.6
		28.992	175.85	17.395	936.4
		9.766	689.35	10.376	331.6
		27.161	302.6	7.935	109.15
		12.512	328.95	14.038	261.85
		17.395	371.75	23.804	415
		10.071	36.5	7.935	73.3
		12.512	113.2	10.071	671
		21.362	22.8	10.681	91.6
		8.85	72.6	11.597	1370.1
		9.766	169.75	18.921	125.95
		16.174	290.2	6.714	22.55
		8.545	24.9	7.324	472.6
		10.681	61	9.766	1058
		10.681	209.6	9.155	2257.25
		7.324	68.2	6.104	110.65
		12.817	32.05	10.376	496.2
		13.733	60.55	10.681	543.5
		9.155	77.2	11.902	697.45
		16.479	15.35	10.986	208.3
		10.071	190.75	13.123	147.85
		14.038	217.6	15.869	602.05
		6.409	212.2	12.207	748.45
		5.798	54.2	7.629	879.15
		9.46	56.7	6.714	424.9
		7.629	66.7	5.493	737.5
		10.681	127.9	9.155	21.25
		23.804	38.45	9.766	579.95
		7.629	68.15	8.85	177
		8.24	278.55	7.324	1408.9
		19.226	56.15	12.207	1378.5
		7.629	186.6	24.414	548.05
		18.616	44.15	14.343	734.15
		13.428	19.95	10.681	22.45
		18.311	66.6	8.24	1025.1
		11.902	102.85	16.174	653.3
		14.343	9.9	18.311	1186.9
		6.409	92.9	9.766	951.7
		6.409	156.95	7.935	500.9
		26.855	138.4	10.071	528.9
		12.817	148.5	10.376	83.35
		12.817	50.3	7.935	403.1
		10.986	120.2	8.85	331.7
		6.409	66.9	9.155	301.65
		11.292	67.1	6.409	402.95
		8.24	74.15	20.752	150.85
		9.766	113.4	20.142	1759.2
		10.376	102.95	15.564	896.25
		19.531	276.8	9.46	324.9
		11.597	71.05	25.94	92.9
		3.967	16.05	11.292	381.25
		11.902	39.45	7.019	64.75
		5.798	146.7	8.24	831.8
		10.071	98.6	19.836	284.65
		12.512	169.75	12.512	176.25
		6.714	158.45	10.681	60.65
		10.071	616.05	8.545	27.2
		8.85	40.6	10.071	475.55
		9.46	89.75	9.46	686
		9.155	35.05	7.019	226.7
		10.071	36.55	10.681	113.25
		9.155	59.85	9.46	746.45
		11.597	21.75	17.7	250.95
		7.935	115.25	7.324	2179.65
		11.902	31.05	10.376	116.6
		8.24	27.25	10.376	1314.55
		7.935	126.95	13.733	324.95
		8.85	46.75	8.545	663.35
		11.292	112.4	20.447	389.65
		19.531	57.35	11.902	44.35
		6.714	24.1	6.714	684.6
		7.935	74.95	7.324	566.1
		5.493	102.3	11.597	204.2
		10.986	223.65	9.46	400.55
		12.207	35.15	6.104	465.85
		12.817	200.3	15.564	1156.4
		15.869	70.15	9.766	37.3
		14.038	68.5	5.798	294.75
		8.85	156.4	14.343	1790.65
		11.597	132.05	9.46	134.7
		28.687	74.65	10.376	41.9
		7.935	324.3	9.46	285.55
		7.629	37.75	19.226	678.1
		10.071	64.8	9.46	196.2
		10.681	236.95	10.071	916.1
		7.324	79.75	23.193	463.7
		8.24	35.8	7.629	1498.8
		18.616	25.15	8.24	766.55
		14.038	146.8	8.545	804.45
		6.714	81.95	7.935	606.7
		9.155	52	19.226	337.8
		5.493	73.15	16.785	352.45
		18.921	36.75	14.343	320.95
		7.629	146.4	10.071	183.6
		8.85	33.6	8.85	71.25
		16.174	30.8	15.869	624.05
		6.104	101.75	13.733	655.5
		5.798	21.15	7.935	60.05
		7.324	40.1	22.583	376.75
		18.311	34.5	12.207	819.5
		10.681	41.75	11.292	281.9
		14.038	86.45	7.935	64.7
		6.104	41.8	10.376	514.75
		7.324	65.95	7.629	1480.8
		9.766	25.85	20.142	224.7
		13.733	73.65	6.714	46.55
		11.292	95.6	8.545	141.25
		9.155	226.25	6.409	46.05
		7.324	25.1	9.155	269.6
		8.85	59.8	7.629	531
		6.714	301.2	6.104	336.9
		9.46	34.6	10.681	180.25
		7.019	87.7	6.714	30.3
		8.545	43.6	22.278	309.35
		5.798	104.2	7.324	128.1
		8.24	50.3	10.071	90.7
		8.545	19.2	7.935	340.7
		9.766	118.2	10.376	238.1
		11.597	310.35	8.85	135.5
		9.155	62.85	7.019	178.1
		9.46	28.25	8.85	247.9
		9.46	11.5	8.24	300.75
		6.409	136.9	12.207	171.35
		18.005	69.2	8.85	26.85
		21.973	89.65	8.85	31.15
		13.733	237.65	6.104	91.7
		10.376	79.2	7.324	624.2
		8.85	214.75	12.207	725.6
		8.85	133.8	6.714	117.9
		13.428	166.35	10.681	147.4
		7.935	51.15	8.24	84.6
		7.019	137.7	9.155	132.2
		9.155	115.25	9.155	415.2
		7.629	82.45	24.414	230.25
		8.545	28.2	7.019	301.2
		6.409	280.9	11.292	321.4
		6.409	414.65	12.512	237.45
		11.292	10.3	6.409	281.25
		6.409	76.85	16.479	81.2
		12.817	65.2	10.681	102.75
		7.019	187.1	10.681	66.95
		16.785	45.2	13.733	352.1
		5.798	387.65	12.512	100.35
		6.409	42.8	10.071	329.9
		11.292	21.95	11.902	21.8
		21.057	273.9	7.935	676.5
		8.545	397.55	8.24	111.9
		9.46	181.35	7.019	364.7
		7.629	214.7	8.85	220.9
		12.817	170.4	7.629	546.55
		5.188	65	15.869	44.2
		12.512	65.1	14.038	64.95
		13.428	126.3	7.324	102.85
		21.973	41.1	8.545	29.85
		5.188	27.05	8.545	135.6
		14.954	59.8	21.057	198.35
		8.545	14.3	7.935	29.6
		12.207	134.4	6.409	169
		13.733	273.8	7.629	169.5
		10.071	84	7.324	47.65
		10.986	88.3	7.935	76.7
		9.766	23.15	6.409	297.85
		9.766	68.05	8.24	502.45
		6.714	26.25	15.564	23.25
		9.155	187.75	6.104	109.85
		6.409	13.2	8.24	164.85
		8.545	88.8	7.324	372.3
		7.324	22.25	10.986	11.2
		7.935	50.45	6.104	50.2
		10.986	347.95	12.207	151.05
		11.902	202.45	8.545	45.4
		10.071	113.15	8.545	279.45
		9.155	52.65	9.46	51.6
		11.597	133.35	8.24	434.95
		9.766	38.2	10.681	32.35
		7.629	166.15	7.019	177.8
		10.071	125.55	9.155	142.6
		5.493	59.6	11.902	276.8
		9.766	227.9	12.207	555.6
		11.292	69.85	8.24	45.8
		5.798	55.45	10.681	458.3
		15.869	186.35	7.629	336.85
		16.479	144	11.292	94.3
		9.46	80.8	7.629	16.45
		7.935	228.1	15.564	100.5
		16.479	111.15	8.24	420.3
		22.888	187.5	7.019	47.55
		22.888	163.4	9.155	349.1
		16.479	15.25	10.071	378.3
		7.324	123.35	16.785	42.3
		15.869	30.4	15.869	306.4
		25.94	69.75	8.85	268.1
		13.123	189.25	7.629	386.8
		9.155	41	8.545	230.65
		11.597	273.25	10.376	322
		18.005	43.95	16.174	74.85
		11.292	102.8	10.681	798.05
		17.09	168.5	6.104	500.8
		11.597	61.2	10.681	80.9
		18.311	33.1	7.629	85.2
		14.954	56.9	7.629	31.5
		7.324	51.35	10.071	40.3
		5.798	175.35	12.512	79.8
		9.155	70.75	15.564	100.35
		15.259	174.6	17.7	13.05
		11.597	161.65	6.409	41.7
		14.648	488.7	22.583	175.55
		6.104	195.15	8.85	167.85
		18.616	125.8	7.935	262.25
		10.681	202.3	14.648	162.5
		7.935	189.2	6.714	89.7
		22.583	108.35	25.024	179.7
		12.207	147.65	14.343	29
		11.9	960.7	11.902	289.35
		7.63	269.4	7.324	464.6
		8.55	103.9	8.545	367.85
		17.09	669.65	8.24	246.05
		18.62	51.05	6.714	65.55
		11.6	247.8	15.564	72.65
		14.95	486.05	14.038	132.8
		7.02	25.55	36.011	84.85
		19.84	297.2	10.376	326.15
		7.94	29.15	7.019	68.1
		8.55	1868.5	11.902	39.3
		11.9	252.35	9.766	125.7
		9.46	2040.65	10.071	138.8
		8.55	1077.95	11.597	207.05
		9.46	797.35	15.869	163.75
		11.6	146.15	19.836	38.2
		11.6	228.55	12.207	47.85
		7.63	114.75	12.512	60.45
		9.46	647.85	8.24	427.1
		12.51	110.25	8.545	271.2
		9.77	1567.25	7.324	179.85
		12.21	238.45	11.902	94.65
		9.77	511.85	16.174	116.45
		21.06	22	9.155	36.15
		15.87	52.05	7.935	202.45
		7.94	139.15	17.395	15.3
		44.86	368.05	17.7	71.7
		14.95	454.45	15.564	36.15
		20.45	287.75	6.714	62.55
		24.72	635.75	13.428	26.7
		12.21	1130.6	9.766	37.1
		8.85	98.1	7.324	51.3
		13.12	601	9.46	15.2
		14.34	86.35	7.324	32.4
		8.24	114.15	9.155	213.1
		8.55	1211.15	10.376	33.7
		11.902	352.75	8.24	56
		11.292	297.95	7.324	113.7
		18.921	237.3	8.24	168.65
		16.174	296.35	9.766	346.45
		6.104	57.9	6.714	30.25
		7.935	119.7	22.888	84.9
		15.869	72.1	16.174	197.25
		9.77	260.05	6.104	68
		8.85	321.55	16.174	64.55
		20.14	480.65	14.648	439.6
		16.48	78.65	14.648	361.6
		8.24	2367.85	6.714	271.95
		18.62	1178.55	8.24	60.75
		27.47	138.4	8.24	54.25
		19.23	330.5	10.071	212.4
		16.17	1693.15	15.259	51.4
		7.63	834.7	14.343	71.05
		15.26	178.15	15.564	52.8
		7.94	228.15	10.986	93.35
		7.02	438.65	6.714	27.5
		10.07	225.8	7.324	49.2
		21.36	218.65	10.986	235.8
		18.01	238.95	10.986	261.15
		10.99	774.25	14.648	52.4
		10.99	38.2	7.935	211.3
		11.9	242.5	25.33	135.75
		13.43	655	5.798	235.3
		8.85	52.65	7.629	95.55
		12.21	229.45	8.85	15.85
		24.41	213.25	8.24	380.75
		5.49	334.65	12.512	618.3
		15.87	1162.2	11.902	134.2
		16.48	930	18.311	79.8
		37.54	1065.45	10.681	487.7
		22.58	53.95	10.376	210.2
		37.23	91.85	14.038	133.05
		17.7	725.65	11.292	139.65
		12.51	606	7.324	65.9
		25.94	856.05	7.324	32.4
		9.766	213.35	7.324	199.65
		23.193	1274.95	7.324	301.25
		10.986	311.8	7.324	151.5
		10.986	1817.3	17.09	68.25
		9.46	677.15	10.071	54.65
		16.79	603.05	12.207	80.95
		17.09	8.4	12.817	28.9
		21.973	478.5	15.564	90.85
		11.6	566.75	12.512	40.35
		11.29	34.75	15.259	130.05
		8.85	972.05	14.343	74.25
		9.46	270.55	7.935	307.15
		7.02	385.4	12.817	278.55
		10.99	224.2	7.629	23.2
		6.71	227.75	13.123	127.45
		20.45	566.55	17.09	105.55
		19.53	46.4	6.409	25
		19.53	850.8	11.597	39.5
		17.7	123.6	7.324	31.15
		12.51	30.75	11.292	140.95
		14.65	383.15	17.395	33.9
		19.53	79	6.409	24.35
		7.63	210.75	6.714	25.05
		8.85	279.9	6.104	78.8
		8.55	54.05	5.798	42.65
		16.79	52.45	20.447	76.15
		9.16	785.8	8.24	245.6
		6.41	1031.1	10.071	85.45
		7.32	892.85	7.324	184.45
		14.34	60.45	12.817	181.5
		14.95	104.7	8.24	294.75
		31.74	214.5	7.019	401.75
		12.51	545.35	7.324	55.75
		21.973	162.8	16.479	179.3
		10.986	1385.45	28.381	106.5
		12.512	257.65	10.071	342.75
		9.155	48.8	6.409	139.9
		32.043	53.85	12.207	39.7
		6.714	232.9	10.986	12.05
		9.46	199.9	26.855	41.85
		8.55	1185.55	6.714	143.55
		35.1	264.25	19.226	346.45
		15.87	69.45	13.428	55.9
		8.55	76.95	8.85	42.7
		15.56	1136.6	9.46	61.75
		13.12	230.3	11.597	414.15
		17.4	514.65	9.46	296.5
		10.07	130.55	11.597	73.5
		19.84	41	12.817	141.7
		17.09	184.6	8.85	119.65
		14.34	182.8	19.226	374.85
		10.68	47.45	12.207	115.15
		8.24	436.75	8.85	183.2
		10.38	165.95	22.888	115.45
		18.92	99.5	7.935	17.95
		11.6	555.75	9.155	112.9
		14.04	568.75	12.512	174.7
		8.85	487.25	17.7	243.65
		7.63	61.85	9.155	35.3
		7.63	136.45	16.479	130.6
		10.99	44.9	10.376	59.7
		7.02	126.75	15.259	163.35
		11.6	316.4	11.902	155.6
		7.63	85.6	9.155	290.3
		7.32	731.55	12.817	79
		12.51	360.7	12.512	157.05
		14.65	24.2	12.207	62.1
		13.43	28.85	10.376	179.85
		13.12	73.7	10.681	54.9
		55.542	581.45	10.071	230.3
		7.629	124.85	10.071	42.7
		24.109	1966.15	20.752	91.4
		8.24	336.7	13.428	254.9
		8.545	41.95	10.071	27.3
		7.63	575.75	9.766	54.4
		17.09	522.25	16.479	210.95
		7.94	272.85	9.155	489.35
		17.7	786.6	6.714	62.25
		18.92	144.8	17.7	147.7
		9.46	186.15	10.986	232.3
		14.65	21.9	6.409	790.3
		8.24	336.7	24.719	132.35
		27.47	104.25	6.104	125.85
		10.99	394.05	12.512	167.7
		9.77	116.55	7.019	116.4
		17.7	302.7	18.616	30.8
		8.24	102.4	5.798	52.4
		6.1	587.95	12.207	68.95
		10.99	26.15	12.817	407.3
		10.07	743.25	27.161	143.1
		9.46	520.35	9.155	124.5
		41.5	1270.4	14.343	102.4
		11.9	741.85	6.409	34.6
		9.46	172.45	8.545	52
		14.04	1451.6	21.973	267.65
		11.9	139.65	13.733	22.7
		7.02	546.45	11.292	214.7
		10.99	95	15.259	136.95
		13.43	1907.95	11.292	49.3
		7.02	247.1	13.428	96.25
		23.8	201.25	9.766	169.15
		22.28	319.75	9.46	84.4
		7.94	261.75	10.986	279.8
		11.29	349.9	7.629	107.15
		20.75	11.5	13.733	378.95
		9.16	1905.7	27.466	43.8
		9.77	232.65	7.324	58.7
		9.16	446.55	8.545	314.1
		12.82	184.65	11.597	37
		10.99	145.5	23.499	159.5
		15.56	3218.1	7.324	196.7
		14.343	156.45	21.973	43.8
		17.7	406.05	8.545	108.9
		12.512	22.3	6.104	11.85
		43.945	1490	7.629	621.45
		18.005	92.1	9.46	55.4
		8.24	202.05	15.259	45.95
		21.973	610.7	8.24	91
		5.188	67.4	12.817	150.35
		10.071	58.8	10.376	136.85
		18.616	65.75	6.714	93.4
		20.752	20.85	16.479	227.9
		8.545	152.6	41.809	528.25
		8.24	217.75	6.104	26.75
		5.493	96.05	10.071	115.05
		13.733	415.35	15.259	631.65
		10.071	105.85	12.512	105.85
		10.681	40.05	8.545	516.85
		7.019	567.95	11.292	14.05
		6.409	170.9	25.33	147.9
		6.104	14.45	14.038	736.6
		7.935	125.45	10.681	148.05
		6.104	95	7.324	241.85
		7.629	127.9	11.597	11.95
		6.104	662.1	11.902	532.85
		10.986	315.2	8.85	354.1
		17.395	173.65	12.512	30.1
		7.935	66.65	7.935	378.5
		6.409	21.45	13.428	35.8
		5.493	336.75	13.733	137.35
		6.714	186.9	8.545	183.05
		6.104	27.25	4.272	333.45
		6.714	74.95	10.681	70.8
		9.766	333.6	7.019	303.15
		8.545	26.9	18.311	192.8
		8.24	228.95	18.921	111
		6.104	34.15	9.155	303.45
		4.883	59.8	20.142	57.75
		6.104	35.15	14.648	414.85
		15.564	92.45	19.226	45.8
		6.409	39.1	11.597	167.15
		8.85	64.55	10.681	138.4
		11.597	381.5	10.376	66.75
		12.817	27.1	8.85	65.95
		9.155	88.2	7.324	85.9
		7.019	28.15	16.479	107.55
		6.714	88.85	12.207	361.95
		13.123	157.05	10.376	76.8
		8.24	110.95	6.714	340.15
		5.188	300	6.714	44.55
		7.019	255.3	9.155	171.05
		5.798	474.1	10.071	410.25
		6.409	46.5	11.597	94.1
		4.883	117	8.24	124.65
		6.714	217.45	18.005	151
		8.545	243.8	21.057	32.05
		8.545	413.9	7.629	70.35
		5.798	300.8	12.512	313.95
		10.681	128.8	8.545	55.6
		8.24	449.4	10.376	88.9
		8.24	151.6	19.226	55.85
		7.629	130.95	10.681	302.6
		10.681	23.4	15.869	30.05
		8.85	159.65	20.142	353.8
		7.629	38.25	12.512	111.3
		13.123	133.3	7.935	26.8
		6.409	616.4	21.973	26.6
		11.597	377.6	7.324	52.45
		5.188	12	7.629	121.9
		10.376	46.3	6.104	122.45
		8.24	66.85	5.798	246.55
		8.545	149.9	8.24	122.45
		23.193	80.65	12.207	102.45
		7.324	63.1	19.836	117.15
		5.493	252	5.493	102.65
		9.155	86.35	18.616	131.3
		6.714	136.3	6.409	33.15
		9.155	63.95	9.155	39.35
		8.85	76.75	11.292	1.9
		8.24	364	18.311	49.9
		6.104	220.65	7.324	126.5
		7.935	47.8	20.447	30.6
		11.902	270.65	12.817	66.9
		13.733	262.05	7.324	9
		8.24	59.1	10.071	877.65
		5.493	275.7	16.785	84.6
		5.798	49.7	7.019	302.65
		7.935	458	26.855	82.1
		11.902	83.4	7.629	50
		16.479	114.3	7.629	46.8
		7.935	18.15	15.869	142.45
		11.292	70.65	10.376	167.2
		11.597	150	5.798	108.1
		14.343	294.05	8.24	379.2
		9.766	366.9	9.155	105.05
		5.188	165.35	15.259	100.85
		7.019	33.55	13.733	157.35
		5.798	58.9	7.629	257.75
		8.24	797.3	14.038	118.3
		6.714	469.25	10.986	19.3
		16.785	72.15	10.376	58.7
		20.142	576.2	8.545	38.65
		10.681	153.3	7.935	135.95
		6.104	232.35	36.621	166.15
		9.46	261	9.766	251.7
		8.545	404.85	11.292	33.55
		4.883	81.9	8.85	175.5
		11.902	114.4	16.785	94.05
		5.493	234.8	7.324	101.7
		5.798	425	6.409	241.5
		6.104	173.7	11.292	289.7
		13.123	370.75	14.038	285.95
		10.986	16.05	14.954	94.15
		15.869	247.8	11.292	20.8
		9.46	148.4	7.935	21.8
		11.292	35.55	9.766	300.45
		12.512	168.8	11.597	506.55
		5.493	45.55	9.155	214.3
		7.935	54.4	10.681	116.35
		5.798	110.45	6.409	616.6
		10.376	197.1	25.024	132.1
		5.188	201.45	8.24	138.5
		8.24	49.95	11.902	135.5
		12.207	174.9	13.123	147.85
		12.512	244.4	18.921	34
		6.714	48.25	10.376	240.15
		8.545	129.65	18.311	52.75
		8.24	526.45	7.629	99.2
		22.583	211.85	10.681	39.4
		10.681	21.5	9.766	143.1
		10.071	138.95	10.986	50.2
		12.512	68.25	14.038	58.95
		9.766	246.75	22.888	82.4
		10.681	261.75	9.155	275.75
		6.714	205.4	10.071	630.75
		4.578	128.1	40.283	511.8
		7.935	17.75	14.343	370.55
		10.986	186.3	10.681	86.95
		12.207	203.25	7.324	45.75
		6.409	51.15	11.902	206.4
		11.292	146.45	8.545	28.35
		10.376	57.1	10.681	49.45
		7.629	63.55	6.714	63.7
		7.019	345	9.155	207.85
		10.986	213.45	12.512	196.25
		6.104	331.15	10.681	76.25
		6.409	37.4	8.85	23.2
		7.019	191	26.55	233.3
		7.324	198.2	8.545	127.35
		8.545	136.1	7.629	220.65
		7.324	124.9	16.479	70.5
		10.071	150.7	10.071	501.65
		7.324	0.05	14.343	49.7
		7.324	189.85	12.512	189.4
		8.24	244	7.324	117.4
		9.155	202.6	11.902	116.55
		11.902	364.8	9.155	129.15
		9.155	437.2	7.324	31.05
		7.324	50.65	8.85	401.4
		10.376	580.9	10.986	214.55
		6.409	225.9	7.324	87.25
		11.597	154.05	11.292	127.2
		5.798	105.9	9.766	401.2
		7.324	248.1	8.545	32.15
		5.493	252.6	15.259	398.75
		10.986	341.25	10.071	386
		12.512	194.4	11.597	289.6
		6.104	130.05	9.766	294.3
		22.888	55.45	18.616	75.85
		7.324	33.55	10.376	17.9
		6.104	84.05	25.94	53.05
		6.714	247.05	21.667	41.5
		5.493	366.05	13.123	26.65
		15.259	393.1	11.597	165.4
		8.85	516.15	19.836	43.05
		8.24	267.5	6.714	266.05
		8.24	413.65	8.24	112.2
		7.629	118.15	17.7	27.65
		19.531	79.3	14.648	113.6
		9.46	228.55	8.24	267.25
		10.986	137.85	8.24	103.05
		11.597	57.05	6.409	20.9
		6.409	207.3	6.104	57.05
		9.766	66.85	28.687	134.95
		5.798	114.5	11.597	65.7
		7.629	226.65	25.024	267.15
		12.817	97.65	18.921	337.65
		9.46	130.25	11.597	479.7
		6.104	148.85	9.155	421.85
		6.104	83.05	10.376	195.15
		6.409	53.05	7.324	95.95
		10.681	180.65	16.479	401.3
		10.071	17.4	18.311	56.2
		10.071	344.35	13.733	56.65
		8.24	151.25	13.428	59.3
		9.46	150.65	12.512	57.55
		7.629	104	6.714	135.85
		10.071	212.25	10.986	259.2
		7.935	122.2	17.09	20.3
		7.935	266.05	13.123	102.55
		5.798	369.7	9.155	126.5
		4.883	115	6.104	29.25
		11.292	1234.3	9.766	25.85
		7.629	136.4	8.24	21.05
		9.155	143.7	23.193	86.45
		9.46	84.75	8.24	123.1
		11.902	103.65	9.766	278.2
		9.155	60.85	9.46	364.45
		48.218	87.4	6.409	231.9
		17.7	52.25	16.479	410.6
		15.869	245.35	8.85	25.15
		21.973	73.2	4.883	13.4
		9.766	228.95	5.798	84.55
		19.53	214.15	4.883	16.2
		19.84	28.05	6.714	42.9
		18.92	18.25	4.272	57.3
		11.6	159.3	4.578	686.2
		22.89	25.55	4.272	93.95
		17.4	155.25	8.85	168.35
		16.48	13.25	9.155	81.3
		11.6	300.05	5.493	45.05
		9.77	96.05	10.986	34.45
		9.46	17.6	7.629	47.35
		26.25	200.15	7.019	815.65
		13.12	208.35	4.272	520.05
		13.12	141.65	5.493	86.3
		17.4	212.85	9.155	57.2
		17.09	190.95	7.324	391.75
		12.51	153.2	5.798	84
		23.8	185.4	9.46	60.8
		10.99	112.95	8.545	14.25
		13.43	36.45	5.188	159.25
		24.72	22.1	8.545	155.25
		10.68	144.8	8.24	61.95
		21.667	241.75	10.376	587.45
		13.428	175.6	7.324	284.6
		20.752	834.45	8.545	6.35
		34.18	110.2	12.207	121.25
		8.85	24	9.155	235.25
		19.226	583.35	5.188	124.25
		11.9	146.25	9.155	107
		17.09	164.2	6.714	272.6
		8.55	213.05	8.24	116.25
		13.73	154.9	9.766	55.15
		19.23	45.8	6.104	197.7
		11.6	62.55	4.883	15.15
		13.73	188.65	8.85	19.55
		25.33	139.3	6.104	152.1
		19.23	46	5.798	157.4
		8.55	35.55	10.681	188.7
		20.45	306.8	11.597	719.55
		10.68	255.15	12.207	59.65
		13.43	547.2	9.766	76.6
		27.77	38	11.292	726.65
		15.56	121	7.629	209.2
		9.46	40	19.531	92.6
		13.43	82.55	9.155	181.45
		10.38	594.8	11.292	610.85
		22.28	229.15	13.123	117.75
		10.07	300.2	7.935	584.3
		10.68	114.45	6.104	41.1
		8.85	243.85	7.019	35.45
		8.24	66.1	7.324	353.8
		9.46	42.95	7.324	419.45
		20.75	166.75	8.545	175.2
		18.92	284.15	4.883	224.35
		13.12	24.4	6.104	107.2
		13.12	12.1	20.142	100.4
		14.95	178.65	13.733	134.6
		10.07	109.6	7.629	206.45
		8.55	76.05	7.935	28.15
		12.51	328.05	7.324	265.1
		23.5	13.45	3.662	172.2
		19.53	99.85	5.798	208.85
		10.07	43.9	11.902	25.55
		11.9	142	6.104	268.7
		21.973	75.5	8.545	247.95
		15.564	376.05	8.85	80.05
		11.902	32.45	9.155	299.6
		21.667	80.1	5.493	246.75
		20.752	59.35	6.409	98.1
		25.635	208.5	14.038	120.2
		15.26	43.15	6.104	222.5
		21.36	108.5	9.46	185.5
		6.71	71.2	11.597	140.2
		10.68	45.55	5.188	115.3
		9.77	146.5	3.967	167.2
		12.51	20.05	13.428	146.75
		20.14	46.75	5.798	17.2
		8.55	356.3	7.629	240.85
		15.26	42.25	16.479	25.75
		9.16	126.35	5.188	130.4
		24.11	99.6	17.395	188.4
		11.29	94.2	8.24	4.75
		10.07	528.2	7.324	78.45
		18.31	110.8	13.733	313.55
		17.7	62.8	6.104	367.85
		20.14	109.95	9.766	480.6
		19.53	43.7	4.272	222.3
		10.38	17.1	12.512	187.3
		10.38	135.15	10.071	23.85
		21.06	40.2	5.798	131.3
		28.08	92.5	12.512	585.25
		22.28	77.55	7.019	93.45
		10.99	33.9	4.272	54.35
		13.43	577.65	11.597	35.5
		8.55	379.5	9.155	822.05
		9.77	71.35	8.85	345.7
		25.94	178.6	11.902	155
		19.23	222.85	9.46	177.45
		10.38	12.05	7.935	34.55
		7.02	157.9	6.714	282
		8.24	234.45	10.681	211.3
		8.55	24.8	7.019	274.5
		26.25	222	5.188	720
		14.04	260.4	9.155	285.95
		13.12	323.95	6.409	49.35
		11.9	261.3	5.798	431.2
		12.82	267.35	10.376	147.6
		12.51	17.9	7.324	376.4
		7.94	114.65	13.428	66.25
		10.376	270.75	7.935	72.85
		10.071	416.75	10.986	90.3
		10.681	133.3	7.629	192.4
		25.024	184.85	6.714	205
		10.376	432.6	15.259	109.2
		16.785	132.1	9.46	120.7
		11.597	34	7.324	43.1
		10.071	31.15	4.578	57.95
		17.7	93.4	4.883	18.35
		9.46	315.9	13.733	135.55
		37.54	29.6	6.714	663.1
		13.12	82.9	8.545	99.05
		13.12	210.35	10.986	882.55
		10.68	128.95	5.493	204.2
		8.24	107.3	10.071	420.85
		13.43	60.95	10.071	241.55
		28.38	71.15	6.104	89.25
		16.17	84.6	10.071	169.25
		21.36	598.45	7.324	715.55
		22.89	395.95	7.019	105.05
		16.17	432.5	7.019	474.8
		16.79	434.5	7.019	152.05
		18.01	100.1	10.071	80.1
		21.67	32.25	6.104	113.4
		14.95	72.6	6.104	72.55
		18.31	27.65	9.766	408.4
		9.46	175.75	17.395	45.35
		10.99	139.4	6.714	134.15
		9.46	90.1	6.104	136.65
		24.11	65.15	13.123	246.25
		9.46	9.55	7.629	379.95
		12.51	34.9	8.545	456.15
		11.9	98.6	12.817	79.7
		6.714	124.45	10.986	36.55
		11.6	78.95	11.597	533.05
		7.94	175.25	19.531	710.95
		9.155	172.35	11.902	279.25
		14.04	76.85	6.409	55.9
		12.21	266.75	6.409	7.2
		13.73	84.55	11.902	1031.95
		19.23	89.3	8.545	25.15
		10.99	101.05	11.597	24.85
		11.9	250.35	10.376	12.2
		22.28	219.9	9.46	219.55
		6.1	154.65	9.155	1009.9
		36.01	454.95	7.935	457
		28.08	34.5	11.902	827.9
		17.09	64.45	10.681	400.9
		12.21	188.5	8.24	275.05
		17.09	208.9	5.493	413.85
		13.73	105.2	14.038	118.5
		21.362	69.15	5.798	258.15
		17.395	105.9	16.785	763.45
		16.174	128.2	25.94	76.4
		18.616	129.35	10.681	52.65
		9.46	170.05	7.019	321.6
		10.07	12.45	13.123	76.95
		9.77	84.05	7.935	271
		18.31	14.8	5.188	701.95
		7.629	366.95	5.798	280.7
		16.17	469.6	10.681	141.9
		21.97	43.2	6.409	261.55
		22.28	290.35	12.817	38.05
		33.57	575.65	6.714	133.05
		17.7	94.85	6.104	240.05
		11.9	109.3	10.071	182.15
		20.75	302.3	5.798	258.9
		21.36	178.55	17.395	595.5
		9.77	98.7	12.512	65.65
		8.24	164.25	11.597	25.7
		17.7	138.1	9.766	285.7
		15.26	69.65	6.409	692.95
		18.31	796.4	6.714	51.95
		24.11	132.1	5.493	44.95
		11.6	65.4	11.902	19.4
		15.87	328.95	4.578	331.55
		27.16	34.1	6.104	192.1
		10.68	200	5.798	77.15
		11.29	82.05	11.902	72.7
		18.01	111.75	9.155	90.95
		9.16	69.6	10.681	103.1
		9.766	39.95	6.104	198.35
		21.06	61.9	9.766	26.8
[truncated: 404 more rows]

## Sheet: Figure 6e
Figure 6e
		D2-MSNs, values for cumulative plots						D2-MSNs, mean values per cell
		veh		NAC				veh		NAC
		peak (pA)	IEI (ms)	peak (pA)	IEI (ms)			peak (pA)	IEI (ms)	peak (pA)	IEI (ms)
		13.123	160.9	18.311	229.15			15.23	100.95	11.7	223.6
		27.771	54.65	18.311	383.8			14.72	109.73	13.2	633.1
		10.071	57.95	10.986	550.9			12.7	242.44	9.2	200.7
		23.499	12.1	10.681	62.35			9.46	251.83	9.1	128
		8.85	38.7	10.986	50.85			13.95	188.39	16	202.2
		23.804	44.7	14.954	26.95			13.35	214.71	14.3	336
		9.766	32.05	12.207	66.05			14.5	91.79	12.1	187.9
		10.986	75.55	15.564	110.85					11.8	375.2
		7.629	37.9	7.324	24.95					11.6	360.3
		36.316	55.8	10.986	115.1					12	852.9
		8.85	166.25	16.785	26.65					9.6	330.3
		14.038	241.8	23.499	44.6
		8.85	68.5	10.986	110.45
		16.479	78.9	8.24	39.35
		16.479	76.5	6.409	50.25
		9.766	61.05	4.883	403.45
		8.545	222.8	11.292	360.5
		19.226	130.8	7.629	283.9
		8.85	211.25	5.798	145.35
		19.836	23.55	9.766	190.5
		10.681	239.2	14.343	43.4
		11.597	227.9	10.681	275.25
		9.766	131.9	9.155	27.15
		22.278	73.1	12.817	387.4
		9.46	220	16.479	16.55
		11.902	45.75	10.071	138.15
		11.597	25.15	10.071	250.05
		9.155	40.75	16.174	56.9
		17.7	23.8	7.629	47.7
		54.016	44.5	7.019	27.65
		11.902	48.2	13.733	206.45
		9.46	60.65	14.954	81.25
		10.071	66.05	7.629	97.25
		8.545	144.95	12.817	58.3
		18.311	53.6	12.817	143
		23.193	8.7	15.869	359.3
		22.583	76.55	8.24	116.45
		18.005	506.15	8.85	18.2
		9.46	59.15	6.104	392.05
		23.499	21	14.648	144.65
		10.071	25.6	36.011	382.3
		29.907	139.75	10.071	98.4
		8.85	43.65	10.681	71.9
		21.362	79.85	8.85	150
		13.428	55.4	21.362	30.3
		13.428	296.45	13.733	286.35
		11.597	68.2	10.986	167.3
		11.902	201.05	22.583	34.15
		8.24	25.9	9.155	203.9
		14.038	121.45	8.24	19.55
		13.428	35.65	15.869	162.75
		33.264	45.1	11.597	151.25
		9.46	53.75	10.681	109.75
		10.071	110.7	6.714	26.15
		22.888	397.2	13.428	32.85
		10.681	120.9	30.823	250.3
		43.335	65.1	7.629	246.45
		9.155	49.15	6.714	23.1
		14.038	21.5	9.46	63.55
		9.766	110.1	10.071	218.25
		12.207	48.95	18.005	94.45
		14.648	60.25	10.071	164.4
		10.376	254.65	19.226	200
		11.292	14.55	11.292	500.6
		7.935	18.95	13.428	369.2
		21.362	54.15	8.24	150.65
		21.362	94.35	10.986	512.35
		8.545	113.85	5.798	136.3
		14.648	160.75	28.381	123.7
		14.038	67.3	10.376	26.4
		9.46	69.85	23.499	450.85
		14.343	496.55	7.629	824.75
		11.292	18.3	8.24	213.55
		12.512	74.75	14.954	134.65
		18.311	218.3	13.428	52.8
		11.902	22.45	11.292	303.35
		11.292	22.5	10.681	364.65
		13.428	64.45	23.804	176.1
		18.921	40.5	8.85	90.35
		10.986	78.5	8.545	40.05
		9.155	86.6	5.798	246.55
		9.766	60.25	6.409	655.9
		10.986	154	11.292	269.85
		14.038	50.7	11.292	89.35
		15.869	169.1	7.324	220.35
		16.785	272.2	9.46	235.05
		15.869	61.2	21.667	761.45
		16.174	195.85	11.597	77.6
		13.428	27.9	9.155	120.2
		13.733	199.9	6.104	170.35
		13.123	0.05	8.85	61.65
		13.428	28.55	7.629	216.2
		18.921	39.2	7.629	36.55
		22.583	46.35	15.564	50.6
		11.597	53.25	6.104	286.5
		14.343	85.2	13.123	631.15
		10.071	30	13.123	1182.65
		8.545	30.95	14.038	342.15
		8.85	92.5	10.681	39.15
		7.935	13.8	11.292	27.75
		14.954	133.05	9.155	210.5
		19.836	95.15	14.648	498.75
		13.733	28.85	10.376	61.2
		11.902	32.2	8.24	76.7
		11.292	55.35	13.123	271.85
		21.057	30.35	13.733	568.75
		12.817	30.1	15.564	213.15
		30.212	70.5	9.766	165.65
		8.24	86.5	11.292	172.5
		15.564	50.2	9.155	81.35
		12.512	13.8	7.935	140.4
		28.992	27.2	10.681	161.5
		10.071	66.45	13.428	48.6
		11.902	35.6	14.038	466.95
		30.518	37.4	12.207	176.9
		10.681	128.6	7.935	200.65
		14.343	226.2	8.24	140.4
		8.545	21	11.597	361.75
		10.986	23.65	12.817	224.95
		19.531	73.75	14.954	71.65
		15.869	56	14.343	47.75
		32.654	28.5	8.85	135.8
		10.071	85.2	10.376	748.35
		11.292	119.05	14.038	229.05
		10.681	42.6	10.376	194.6
		18.311	195.7	9.766	143.85
		25.33	128.65	10.681	144.45
		11.902	133.15	10.681	120.4
		25.635	72	10.071	116.75
		9.155	41.65	8.545	36.9
		23.193	84.3	10.986	369.45
		37.537	204.65	12.817	42.5
		7.019	21.6	14.648	114.95
		10.986	149.45	5.798	1121.65
		11.292	65.6	10.071	208
		10.986	42	21.057	151.85
		12.207	214.45	13.428	140.85
		8.85	92	5.798	238.3
		15.869	57.35	13.733	53
		12.207	7.95	8.24	260.05
		13.123	104.45	15.869	87.45
		16.174	44	18.005	53.05
		9.766	223.6	8.545	175.85
		8.545	659.45	9.766	50.15
		26.55	90.5	7.629	159.9
		10.681	18.15	10.681	122.3
		9.766	44.45	12.512	146.25
		22.888	39.7	16.479	164
		19.226	14.25	7.935	77.1
		16.479	159.7	12.207	111.35
		16.174	253.55	8.545	226.3
		18.005	35.3	19.531	77.05
		14.648	89.4	17.7	284.55
		25.635	18.3	10.681	293.25
		14.648	41.9	9.766	105.45
		9.155	157.35	7.935	584.65
		10.986	44.7	8.85	44.95
		18.616	72.75	26.855	247.85
		12.207	43.9	14.038	205.4
		15.564	60.3	13.123	390
		9.766	283.95	9.46	213.15
		27.466	206.4	10.376	287.7
		18.311	171.85	10.681	114.6
		8.24	208.55	22.583	52.45
		10.681	370.35	21.667	317.1
		15.869	32.3	12.817	162.75
		7.324	8.35	17.7	911.6
		14.648	48.15	8.85	117.25
		14.343	23.15	10.376	17.95
		13.428	83.75	6.104	195.2
		10.071	275.7	10.071	21.9
		18.005	39.4	12.512	209.75
		10.681	286.05	9.766	194
		18.921	457.2	6.714	145.05
		12.817	216.45	7.019	6.2
		8.85	135.05	9.766	553.3
		20.142	98.45	14.343	56.3
		8.24	58.65	14.343	303.1
		11.902	114.2	18.005	868.8
		7.629	137.35	9.46	330.2
		20.447	42.2	10.681	546.75
		14.343	450.7	13.123	732.4
		7.019	88.35	14.954	143.7
		28.381	109.75	13.733	22.7
		18.921	605.5	8.24	106.45
		8.545	46.45	13.123	16.1
		14.954	107.95	8.545	1042.6
		25.33	181.15	8.24	386.55
		10.681	15.2	7.935	112.15
		31.433	26.55	19.836	49.7
		8.24	28.1	10.681	207.7
		13.733	23.65	10.681	139.15
		14.648	54.75	10.681	727.25
		9.766	216.95	5.798	133.15
		10.376	24.3	8.24	240.6
		21.057	93.85	11.292	178.45
		11.597	69.1	5.493	831.85
		9.155	314.35	6.714	242.8
		14.648	124.75	7.019	131.75
		10.681	117.1	10.986	143.5
		27.771	227.45	14.648	886.3
		10.681	188.65	6.104	330.05
		34.18	43.7	13.428	1575.15
		19.226	63.9	18.921	383.3
		9.155	42.8	8.85	1648.3
		20.447	46.2	17.395	478.2
		11.597	16.9	39.368	1510.9
		10.071	164.55	10.376	1445.7
		19.836	24.7	10.376	1539.35
		10.986	63.1	14.038	1388.3
		24.109	37.6	23.499	724.35
		8.85	75.9	16.785	494.95
		9.46	110.15	7.324	1640.85
		13.123	60.7	23.193	50.6
		12.817	24.5	8.545	539.6
		7.935	75.1	15.564	538.65
		11.292	169.8	7.324	154.8
		6.104	27.35	8.24	312.3
		8.85	25.5	7.629	273.85
		20.142	230.3	20.447	308.25
		11.597	80.3	10.681	83.6
		10.376	29.2	11.902	57.05
		15.564	81.95	14.343	575.85
		8.545	120.2	12.207	587.1
		15.259	29.35	8.24	611.75
		9.155	88.25	14.343	271.75
		11.292	188.55	12.512	140.7
		22.583	162.1	39.368	517
		8.24	113.9	10.071	447.05
		14.343	92.5	22.888	939.2
		28.381	190.95	14.648	549.45
		24.414	235.4	14.954	248.95
		7.629	152.65	16.479	150
		11.902	36.8	15.564	1112.35
		8.85	37.2	13.123	218.1
		9.155	69.05	9.766	637.85
		16.479	28.2	12.512	1346.55
		13.733	42	11.292	154.65
		10.376	142.75	24.414	350.5
		10.071	33.2	7.935	327.45
		13.123	267.1	15.869	2710.15
		15.564	132.2	18.921	24.95
		24.414	22.85	6.104	1254.45
		28.381	250.65	24.414	540.5
		13.428	191.8	14.038	306.7
		18.616	209.35	13.123	51.6
		7.019	95.1	9.46	1902.15
		13.123	69.65	17.09	154.1
		18.616	211	18.311	423.3
		13.123	31.45	18.311	83.3
		7.629	42.3	8.24	408.7
		20.752	126.8	10.071	841.85
		15.564	51	14.343	972.65
		6.104	31	8.24	348.7
		7.324	114.55	11.292	671.25
		17.395	155.9	19.836	645.8
		23.804	25.15	7.629	161.85
		10.376	75.75	10.986	1514.95
		8.545	38.4	7.019	286.85
		13.123	26.05	7.629	830.9
		10.071	18.75	17.09	3325.7
		16.174	64.45	10.986	254.5
		11.902	138.05	10.681	466.95
		15.259	13.2	8.85	198.25
		13.123	258.6	7.935	1475.8
		6.104	31.05	7.019	2171.7
		7.629	329	8.545	356.3
		8.24	45.9	13.733	1458
		14.038	66.85	6.104	339.75
		8.24	620.3	14.648	2515
		17.09	64.15	17.7	299
		17.395	137.6	22.583	1885.25
		10.986	56.4	13.123	342.5
		12.207	26.9	24.109	2332.05
		6.104	27.55	7.935	533.1
		15.259	192.6	13.428	347.5
		25.33	69.3	30.212	147.15
		20.142	169.35	13.428	22.7
		13.123	35	12.207	97.8
		14.648	377.25	14.038	962.9
		18.616	162.85	14.038	1678.15
		9.766	377.7	13.123	525.3
		9.766	31.2	9.155	1328.4
		18.311	34.9	10.681	426.9
		7.935	44.45	14.343	315.95
		11.597	13.6	7.324	254.1
		13.428	71.85	15.564	533.3
		16.174	48.25	8.545	395.25
		11.597	102.4	16.785	38.9
		10.681	89.65	15.564	657.85
		21.362	81.1	11.902	500.05
		8.545	30.15	10.071	786.65
		9.46	26.9	16.174	205.95
		21.362	149.75	11.902	480.6
		9.46	248.7	13.123	370.3
		16.174	91.35	12.512	58.65
		17.09	89.45	7.629	292.75
		17.09	49	11.902	488.8
		22.888	124.1	10.376	78.5
		27.771	106.9	23.804	803.05
		21.057	194.05	11.292	384.7
		9.46	56.45	10.376	6.7
		31.128	156.65	12.512	745.55
		17.7	315.55	8.24	518.3
		15.259	500.7	10.986	189.9
		7.935	61.1	25.024	567.15
		18.921	187.05	11.902	669.75
		24.719	109.7	21.973	719.9
		11.292	65.7	8.545	2169.1
		12.207	41.2	10.376	643.05
		21.667	27.15	19.836	198.45
		13.123	336.25	11.597	187.65
		13.733	27.8	7.019	505.95
		9.46	54.65	11.902	86.95
		14.648	400.5	14.648	480.3
		16.479	25.55	7.324	246.7
		6.409	38.75	15.869	349.3
		20.752	133.8	9.766	161.45
		18.616	207.15	8.545	82
		10.071	71.9	9.46	422.15
		20.447	23.65	10.681	1447.85
		12.207	77.75	6.714	242.35
		7.324	69.45	10.681	1302.25
		21.362	46.9	5.493	439.6
		7.935	151.65	13.428	28.6
		12.512	317.45	10.681	431
		14.954	216.5	7.935	99.75
		19.531	56.4	14.648	1020.35
		13.733	26.6	6.409	1760.55
		27.466	90.55	7.324	311.8
		16.479	280.45	9.46	1202.75
		8.85	164.65	12.207	312.5
		24.719	31.15	14.954	222.65
		13.733	251.35	11.292	652
		14.954	61.6	18.311	210.3
		11.597	144.6	8.24	2331.25
		15.869	19.2	29.907	97.2
		7.935	44.2	10.681	599.3
		9.766	24.15	12.207	224.4
		10.986	120.85	11.597	587.75
		19.531	10.3	21.973	1793
		10.681	27.2	11.902	341.85
		10.376	269.65	17.395	774.4
		11.292	86.55	11.597	803.5
		15.259	49.25	6.714	17.5
		21.973	225.7	17.09	421.05
		14.954	208.8	10.376	94.9
		11.902	362.45	8.24	576.35
		15.564	32.55	8.24	151.1
		10.071	66.25	11.597	285.6
		12.817	79	20.752	1126.05
		7.935	123.8	14.343	60.7
		16.174	140	8.24	1267.95
		10.376	27.7	17.09	2060.1
		8.545	98.3	7.935	110
		16.174	200.8	25.635	831.1
		19.836	118.75	9.46	393.3
		7.629	154.85	17.7	274.7
		35.4	70.15	9.46	515
		9.46	26.45	33.264	590.5
		14.954	122	7.935	239.5
		20.142	174.75	9.766	129.1
		10.376	240.7	11.902	256.4
		7.324	357.3	24.109	291.1
		22.583	153.2	13.428	740.9
		12.207	143.9	11.292	105.6
		25.024	29.5	11.597	1287
		25.024	157.2	8.24	934.5
		18.921	663.7	9.766	232
		9.766	112.7	21.973	894.4
		22.888	12.3	17.7	737
		9.155	85.75	13.733	422.3
		14.038	46.8	9.766	1038.2
		18.616	57	36.316	1113.3
		14.038	76.65	15.259	32.7
		16.174	229	11.597	217.8
		7.935	39.9	10.986	798
		15.869	64.55	11.292	2937.3
		14.648	97.85	11.292	187.8
		11.902	33.1	14.648	177.1
		18.311	82.15	10.986	361.8
		15.869	52.15	11.902	505
		9.766	93.8	10.986	83.4
		11.292	42.85	9.155	420.1
		9.766	15.4	18.616	150.3
		16.785	201.2	9.155	1687
		13.733	221.45	10.681	156.3
		7.935	18.9	12.817	332.5
		13.123	56.75	11.597	306.4
		10.681	46.9	15.259	2157.6
		14.038	112.1	7.935	295.2
		16.174	46.4	9.766	662.8
		11.597	709.95	12.817	969.5
		28.381	28.6	11.902	1336.1
		14.954	115.85	13.123	278.9
		14.648	290.55	14.648	231.5
		17.7	141.05	10.071	318.8
		22.583	40.95	10.986	1329
		7.935	157.8	9.155	529.2
		10.071	69.3	12.817	1720.6
		9.46	22.65	11.902	408.85
		9.46	102.85	5.798	55
		7.629	102.75	10.376	605.3
		6.714	1075.7	7.935	950.4
		55.847	238.8	5.798	79.65
		6.714	27	5.493	65.1
		10.681	224.25	17.395	363.7
		11.597	148.85	7.019	347.55
		10.071	1504.95	6.409	191.55
		10.986	115.2	5.188	210.4
		19.226	225.7	8.85	106.6
		14.343	31.5	8.24	105.15
		11.597	477.7	10.376	56.4
		8.24	82.85	8.85	870.3
		10.986	221.95	5.798	31.5
		11.292	648.45	9.46	80.9
		13.123	106	6.104	71.55
		9.46	1124.3	8.85	20.1
		12.512	427.85	15.259	149.55
		12.207	216.7	5.798	577.75
		8.545	49.7	12.207	373.55
		17.395	220.1	6.409	558.75
		13.428	85.4	4.883	72.1
		13.733	164.35	7.324	171.5
		11.292	435.4	17.09	503.65
		11.597	60.05	7.019	45.2
		7.629	65.4	7.629	72
		9.155	94.95	9.766	246.45
		7.935	204.75	7.019	602.85
		10.071	118.15	32.959	1021.5
		12.207	100.9	12.817	151.8
		9.766	194.25	12.512	160.5
		6.714	101.9	16.785	335.45
		12.207	54.4	9.46	73.15
		10.071	45.2	10.376	45.55
		13.428	175.5	10.071	143.15
		8.24	21.4	8.85	14.1
		10.986	303.8	5.798	174.5
		9.155	306.6	12.512	576.05
		7.935	339.4	7.019	242
		16.479	267.1	10.376	22.95
		6.714	133.1	6.409	48.85
		8.85	203.7	10.986	205.05
		9.766	96.6	7.629	1076.35
		8.24	373.9	6.104	290.05
		7.935	229.7	7.019	265.15
		21.057	403.15	13.123	348.2
		8.24	105.25	5.493	149.45
		13.123	133.2	11.597	881.1
		19.226	248	6.714	186.15
		7.629	164.7	12.207	479.8
		10.681	157.95	19.226	366.8
		22.888	1004.5	5.798	707.2
		25.024	881.9	6.714	123.15
		15.869	508.25	10.071	39.25
		21.667	399.15	7.935	463.7
		10.071	705.15	9.46	241.6
		15.564	479.85	9.46	142.1
		18.921	118.65	8.545	154.35
		12.512	1124.55	4.883	1041.75
		19.836	86.6	12.512	282.55
		10.071	545.7	6.104	488.1
		18.005	304.35	10.071	51.85
		8.545	918.25	13.123	731.85
		21.057	344.75	11.292	1212.9
		11.902	407.25	7.935	223.4
		12.207	18.05	11.597	56.6
		9.155	126.8	9.155	62.7
		8.85	176.3	5.188	292.3
		10.376	356.15	8.545	110.4
		11.292	134.2	5.493	939.65
		10.071	153	14.038	170.2
		12.817	271.75	13.733	348.1
		13.123	344.6	6.409	43.9
		9.46	263.05	10.376	811.35
		8.24	152	7.324	459.95
		10.986	147.6	6.104	268.35
		10.986	70.9	7.935	52.4
		8.24	316.9	11.902	498.65
		16.479	174.45	12.512	719.35
		14.038	144.8	8.24	372.85
		21.973	159.25	7.629	289.8
		23.499	273.75	11.597	661.55
		16.785	465.45	8.24	129.1
		12.817	518.7	6.104	351.35
		8.24	602.4	8.85	826.05
		10.376	232.35	10.681	179.55
		17.395	146.5	7.935	591.3
		14.343	546.2	6.409	359.35
		6.714	5.75	5.188	56.95
		14.038	62.1	8.545	53.65
		7.935	31.25	6.714	70.35
		19.226	278.7	13.123	846.7
		12.817	155.4	5.188	152.15
		21.057	55.35	7.019	75.3
		14.954	116.3	6.714	956.2
		5.493	352.25	6.714	308.5
		8.85	833	5.798	609.55
		12.817	148.6	6.714	247.45
		11.902	51.05	7.629	72.45
		19.836	301.9	14.954	574.45
		9.155	36.8	5.493	425.8
		10.681	120.2	7.324	916.3
		14.038	85.4	23.193	832.15
		10.376	204.2	8.85	779.85
		7.935	67.7	10.986	54.85
		14.954	244.8	9.155	413
		10.376	291.85	6.104	349.8
		9.766	326.25	11.292	37.25
		7.629	40.6	7.324	341.1
		24.414	370.9	9.766	43.3
		18.311	117.65	6.104	662.4
		10.071	70.65	10.376	726.85
		11.292	147.65	9.155	186.35
		6.714	21.3	5.188	985
		8.24	92.25	4.578	34.55
		6.409	271.4	10.681	27.3
		9.46	111.75	9.46	676.1
		9.766	58.15	9.155	550.2
		13.428	31.85	7.324	451.25
		18.005	205.35	7.935	236.3
		19.531	263.95	6.409	555.1
		8.85	216.05	8.85	444.1
		8.24	77.4	14.648	687.35
		8.24	823.55	9.155	488.5
		10.681	132.15	3.357	301.4
		17.7	89.25	7.324	278.15
		15.564	368.55	5.188	180.4
		9.46	388.75	9.46	150.55
		8.85	20.45	16.479	199.55
		9.46	611.3	9.155	178.3
		14.038	57.9	8.545	177.5
		8.24	889.75	13.123	387.7
		21.362	400.55	15.259	136.4
		13.428	41.55	7.019	86.05
		8.545	213.05	6.409	390.6
		19.531	49.5	9.155	50.95
		9.46	249.95	4.578	858.75
		27.771	99.05	8.85	270.4
		13.123	115	7.324	126.65
		13.123	135.65	5.188	518.6
		10.376	406.8	6.409	178.05
		14.343	527.95	20.752	92.25
		8.545	1018.7	5.798	73.55
		23.499	556.5	13.733	86.35
		17.09	34.05	4.272	154.4
		8.545	29.7	12.207	270.75
		6.409	79.5	8.85	736.95
		10.681	96.5	4.578	428.05
		15.869	564.2	7.629	360.8
		20.447	58.3	7.935	289.55
		12.817	572.95	6.104	596
		13.123	70.15	7.629	141.7
		10.681	584	9.46	204.6
		10.986	55.7	6.714	52.65
		14.648	62.9	10.681	387.45
		10.071	252.05	4.883	46.2
		12.207	704.6	28.687	223.4
		9.46	439.35	7.629	1.3
		9.155	1212.1	7.019	294.4
		11.292	133.4	9.766	75.8
		10.376	22.95	11.292	250.35
		9.46	1113.25	7.629	313.4
		8.85	179.2	7.629	31.5
		15.869	145.7	8.24	78.6
		13.733	298.45	7.629	269.6
		10.376	141.35	6.409	450.3
		13.123	145.4	6.104	51.95
		7.935	404.95	10.071	116.35
		11.902	257.85	8.545	176.05
		14.648	77.45	9.46	411.55
		7.935	232.1	5.493	105.3
		9.155	150.9	7.629	74.35
		13.123	64.5	7.935	352.4
		12.512	245.9	8.24	109.25
		14.648	181.95	10.376	406.85
		28.381	61.8	8.85	80.2
		13.733	455.35	7.019	313.85
		11.597	138.75	9.46	246.45
		14.954	84.9	9.46	61.05
		17.395	248.75	4.883	415.6
		8.24	401.05	16.174	302.75
		18.311	115.8	27.466	160.75
		11.902	106.95	12.817	202.75
		12.512	312.05	5.188	379.65
		22.278	232.75	7.324	173.25
		10.376	392.9	16.174	611.9
		13.428	63.15	5.798	331.95
		14.648	72.45	7.324	57.35
		17.09	97.95	11.597	798.05
		28.381	644.95	7.324	206
		13.428	62.1	6.409	389.45
		10.071	30.95	7.629	78.85
		14.648	77.25	4.272	255.25
		13.428	135.65	18.005	530.05
		6.714	291.75	6.104	102.1
		9.766	328.2	7.324	43.8
		10.376	298	6.104	411.1
		18.005	138.55	7.324	527.1
		9.46	55.45	10.071	31.6
		6.714	28.4	8.24	102.6
		7.935	1040.85	22.583	70.4
		10.681	24.05	11.902	445.5
		9.155	186.25	8.24	22.5
		13.428	62.85	8.24	279.6
		5.493	182.45	11.597	106.6
		9.46	1112.75	13.123	159.05
		9.155	328.7	9.155	7.45
		9.155	73.6	18.921	212.15
		7.019	183.2	8.85	267.6
		5.493	148.2	13.733	94.4
		10.071	403.05	15.259	99.95
		9.155	385.65	14.954	96.2
		7.629	29.15	11.902	59.15
		6.714	226.2	18.616	33.65
		17.395	109.55	5.798	145.5
		7.629	461.45	7.019	192.65
		7.935	134.4	9.155	59.9
		4.272	75.7	8.85	18.55
		8.545	1015.1	8.85	49.85
		6.714	153.1	8.85	31.4
		12.207	256.4	9.46	93.5
		3.662	68.6	9.766	246
		7.935	363.1	17.7	30.1
		5.493	170.2	12.817	197.95
		5.798	212.25	9.155	136
		10.986	171.15	5.798	141.85
		12.512	187.7	6.104	50.2
		5.798	28.85	4.578	35.85
		5.188	306.55	14.954	106.15
		8.24	244	12.817	30.15
		8.24	869.4	10.986	204.05
		6.409	230.1	8.24	70.15
		4.883	88.3	14.954	71.55
		11.292	201	13.733	7.3
		5.493	131.65	14.343	76.25
		6.104	646.9	6.409	111.15
		7.019	388.2	8.545	85.15
		14.343	397.05	9.46	26.1
		16.785	128.8	14.038	119.3
		8.24	41.25	7.324	73.7
		17.7	546.35	9.155	61.2
		8.24	92.85	7.019	102.15
		7.019	954.35	16.174	70.8
		21.973	413.45	5.188	4.45
		13.123	79	22.888	105.5
		9.46	349.3	5.493	72.65
		7.629	438.55	12.817	52.85
		4.883	93.7	12.512	301.25
		8.545	318.55	8.85	153.9
		7.019	169.5	12.207	88.85
		27.771	328.95	11.292	258.95
		12.512	167.6	9.46	157.6
		7.629	178.55	9.766	32.2
		5.188	321.25	6.104	29.15
		5.493	253.9	7.629	69.6
		5.188	267.85	8.545	169.95
		18.005	33.6	10.681	133.3
		5.188	152.25	7.019	149.3
		7.935	663.6	10.376	134.15
		6.714	496.05	6.714	119.65
		5.188	152.8	17.09	66.5
		7.019	124.55	10.376	342.75
		6.104	1088.05	6.714	149.45
		7.324	582.2	7.935	61.1
		10.071	279.6	5.493	46.85
		5.798	94.2	10.071	603.25
		7.935	97.9	15.869	116.9
		9.46	38.7	13.733	258
		10.376	56.2	6.714	548.65
		7.324	200.25	7.935	482.05
		10.376	482.25	6.104	34.85
		6.409	134.4	6.104	23
		16.174	159.7	9.766	114.25
		9.155	764.8	14.648	135.75
		7.935	346.75	5.188	25.9
		7.324	737.8	17.395	161.1
		19.531	171.15	17.7	61.65
		7.019	1339.45	13.428	323.85
		9.155	735.1	5.188	132.2
		9.155	131.9	4.578	59.45
		6.409	135.95	7.935	49.55
		12.817	308.65	12.817	55.1
		16.174	395.5	9.766	31.35
		25.635	237.2	7.019	61.15
		3.357	322.45	5.493	104.2
		9.46	643.55	9.46	89.95
		16.785	118	10.376	219.15
		20.142	19.5	21.667	112.75
		5.493	290.55	6.714	244.65
		9.46	439.05	8.545	131
		11.292	567.45	9.46	62
		20.142	104.15	26.245	84.65
		11.902	248.55	8.545	164.35
		7.629	216.45	8.85	385.95
		6.104	738.75	18.005	34.8
		11.292	521.4	7.935	2.3
		5.493	105.25	11.597	204.2
		5.798	1376.3	4.272	145.95
		7.935	126.05	5.188	133
		5.798	80.1	7.629	83.3
		6.104	68.05	7.324	106.55
		5.188	252.25	6.104	164.5
		8.545	217.8	4.578	63
		14.954	340.9	20.447	67.8
		9.766	490.7	5.798	516.95
		11.597	571.45	7.019	114.85
		7.935	40.25	8.545	37.25
		20.752	355.45	3.967	173.25
		5.188	36.6	12.207	34.9
		6.104	52	11.292	41.85
		7.935	645.6	8.545	253.45
		9.155	27.75	11.292	53.8
		17.7	750	7.324	297.25
		7.019	58.75	14.343	112.7
		14.038	1065.1	10.071	332.1
		16.174	0.05	7.019	103.75
		14.954	187.85	8.545	35.2
		5.493	240.95	8.545	42.7
		5.798	205.2	20.752	275.8
		15.869	192.75	29.602	21.8
		7.019	91	8.85	312.35
		9.46	578.45	9.155	75.2
		11.902	474.95	8.545	47.05
		15.564	880.1	16.479	28.7
		8.85	335.3	5.798	60.9
		6.409	156.25	13.123	143.25
		13.428	564.6	18.311	22.65
		6.714	136	11.597	212.4
		5.188	141.85	12.817	44.3
		6.409	92.8	8.85	144.45
		10.986	595.1	7.324	59.3
		7.935	42.35	12.817	53.9
		12.817	126.8	4.578	88.2
		4.883	703.05	12.817	38.05
		5.493	460.45	7.324	96.5
		3.662	598.05	6.409	72.45
		7.935	175.2	5.493	49.15
		4.883	425.1	8.24	207.65
		9.155	350.05	4.883	139.5
		6.104	277.05	13.123	43.65
		21.667	28.65	8.545	148.75
		11.292	151.15	15.869	182.3
		7.629	584.05	7.935	67.35
		12.817	232.65	10.681	241.3
		9.155	33.8	8.24	77.6
		6.104	523.7	9.766	101.75
		9.155	236.15	20.142	64.75
		7.324	771.55	6.409	127.75
		9.155	402.15	8.545	176.8
		7.629	457.05	9.155	183
		7.629	357.6	12.512	30.85
		12.512	454.15	10.986	169.2
		10.681	51.7	7.935	83
		7.629	22.05	3.662	89.25
		7.935	303.4	26.855	93.55
		10.681	190.1	5.798	77.65
		7.324	164.25	4.578	26.6
		17.09	413.2	6.104	38.2
		6.714	1509.85	7.019	328.15
		6.714	253.3	8.85	215.3
		6.714	1540.35	5.188	63.4
		9.46	281.35	14.343	68.05
		10.681	242.65	13.428	33.65
		19.226	218.75	9.766	42.9
		7.935	471.5	11.292	118.75
		7.935	698.7	5.188	265.55
		10.071	567.9	10.986	46.45
		7.324	46.3	21.362	163.25
		13.428	169.8	9.766	25.4
		7.629	109.3	10.681	43.05
		8.24	876.3	5.798	88.65
		6.714	37.65	8.85	335.45
		9.766	444.25	10.681	97.05
		4.883	433.35	14.343	30.35
		5.798	1355.6	8.85	310.8
		6.714	34.85	11.292	191.15
		10.681	386.65	9.155	357.05
		10.986	106	27.466	57.15
		11.292	616.9	5.798	108.9
		5.493	103.05	7.324	177.5
		12.207	26.95	7.324	50.05
		10.681	90.5	5.493	259.95
		10.071	104.65	11.902	76.7
		7.629	23.05	9.155	116.45
		30.212	374.25	9.766	61.8
		5.798	972.8	10.986	125.65
		11.292	87.5	5.798	150.9
		13.123	421.4	7.935	46.85
		9.766	501.75	14.954	109.35
		7.629	1185.35	5.188	17.4
		10.071	136.95	6.409	49.45
		6.104	163.8	10.681	35.3
		6.714	51.4	4.883	57.4
		10.071	331.05	10.681	46.9
		7.629	617.75	14.038	36.5
		9.155	761.15	8.85	289.05
		9.155	116.25	6.409	186.85
		12.207	183.65	7.935	120.4
		12.512	415.65	16.174	56.8
		24.414	250.2	9.766	172.85
		17.09	75.95	22.278	1172.2
		15.259	290.75	14.038	217.3
		10.376	240.6	20.752	691.35
		14.648	17.05	8.85	111
		15.869	105.4	16.479	1114.15
		14.038	306.95	6.409	431.5
		9.155	274.7	8.545	367.35
		13.733	277.1	6.714	60.3
		10.376	354	8.85	755.8
		19.836	43.5	6.714	1402.15
		7.629	814.75	7.324	93.85
		6.714	189.95	9.766	164.35
		14.038	741.45	9.155	344.25
		7.935	153.05	9.766	98.25
		14.038	81.3	6.714	20.85
		7.019	301.25	21.667	73.75
		7.324	53.6	6.409	223.75
		10.376	321.5	21.362	446.1
		16.174	765.05	28.992	165.9
		7.019	211.8	17.395	185.4
		23.193	150.4	9.155	426.05
		21.057	423.25	14.954	189.35
		11.597	21.45	7.324	148.45
		14.038	256.2	7.629	119.15
		9.46	594.3	10.681	8.25
		7.019	287.05	11.902	1054.3
		20.752	190.25	12.817	729.55
		11.597	9.5	32.959	662
		12.512	126.65	8.545	274.35
		19.226	296.3	12.512	84.9
		16.174	27.4	36.011	450.2
		39.978	467.95	17.09	215.85
		10.376	97.1	9.766	371
		8.545	750.95	16.174	801.6
		15.564	63.2	28.076	741.55
		10.681	214.6	19.531	303.95
		14.343	214.75	21.973	302.4
		7.629	147.1	9.155	119.95
		8.24	70.65	10.071	340.1
		5.798	304.2	7.019	338.65
		7.019	553.45	9.46	239.45
		20.752	21.6	11.292	405.2
		40.588	173.6	7.629	727.9
		7.935	887	14.648	23
		17.395	78	7.935	1084.8
		10.376	48.6	28.687	133
		7.935	141	14.038	367.6
		19.836	210.05	21.667	521.9
		8.85	416.4	7.935	316.1
		14.648	148.25	7.629	474.1
		10.071	189.65	6.714	46.75
		13.123	59.25	26.245	73.75
		10.376	332.9	19.531	83.9
		8.85	314.3	19.531	1540.6
		12.207	62.7	21.973	23.4
		10.681	67.75	8.24	127.8
		13.733	47.8	18.616	1365.55
		24.414	99.2	27.771	12.65
		9.46	498.05	10.376	134.2
		8.85	419.4	20.752	31.4
		12.207	213	6.714	124.4
		5.188	384.9	16.785	380.35
		12.817	26.65	20.752	177.45
		12.207	173.7	11.292	124
		17.09	77.85	16.174	135.5
		10.071	40.3	19.836	217
		14.954	89.2	13.733	701.55
		15.259	471.9	13.123	1837.45
		8.24	749.9	7.324	1268.15
		11.292	633.55	8.24	345.9
		8.545	81.65	19.836	204.35
		14.343	430.15	26.855	707.1
		14.343	91.2	9.155	408.15
		7.019	81.5	15.259	556.55
		13.123	369.6	12.512	226.7
		8.545	244.5	23.499	100.5
		8.85	117.6	7.324	263.85
		19.226	682.05	17.395	111.35
		12.512	70.4	25.33	415.8
		9.155	187.45	18.005	283.95
		11.597	23.1	15.259	261.4
		20.752	230.4	18.616	210
		8.545	79.7	30.212	941.4
		14.343	144.4	15.259	396.7
		7.629	72.9	6.714	144.75
		7.324	96.35	26.55	269.4
		15.259	138.15	12.207	348.85
		6.714	24.6	8.24	1610.9
		5.188	169.6	57.373	472.9
		21.973	86.05	10.376	323.7
		21.362	1155.6	8.24	74.25
		9.766	801.2	9.46	1334.2
		10.681	10.3	8.24	890.25
		11.902	521.2	20.447	1293.1
		10.071	338.2	7.019	666.45
		15.869	381.4	11.902	19.85
		13.428	43.45	15.869	502.7
		16.174	53.75	11.292	409.7
		11.597	163.7	10.071	405.55
		8.545	270.9	10.071	55.2
		9.46	43.6	8.85	118.2
		16.785	120.8	13.733	1116.15
		9.766	261.3	21.362	17.85
		20.447	541.05	8.545	400.9
		11.597	245	30.212	410.1
		6.409	279.6	7.324	301.1
		20.142	48.85	9.46	159.45
		7.629	102.35	6.714	401.05
		8.545	77.1	14.954	510.15
		12.817	246.8	17.09	70.65
		12.817	107.15	7.629	91.45
		10.986	36.45	16.785	526.25
		10.681	338.45	9.766	606.85
		8.545	208.55	10.376	30.15
		8.85	30.4	28.381	100.35
		12.817	143.85	10.986	483.25
		7.019	81.1	15.259	116.5
		11.902	15.6	26.855	675.45
		17.395	144.8	23.499	926.9
		28.687	138.5	14.954	107.25
		7.629	65.1	6.714	687.6
		9.46	17.75	15.259	50.35
		14.648	290.6	7.324	203.65
		15.564	41.2	36.316	122.35
		21.667	136.5	15.564	133.85
		25.94	311.75	19.836	613.9
		17.09	360.2	17.09	199
		14.954	181.7	17.09	199.8
		10.986	42.75	9.766	53.05
		9.46	78.95	21.362	275.35
		7.019	303.65	22.583	181.85
		11.292	110.4	8.85	227.25
		18.921	6.05	6.714	74.25
		24.719	300.2	12.512	310.5
		8.24	277.55	56.152	385.55
		13.428	94.65	8.545	73.2
		10.681	100	13.733	353.05
		10.376	83.9	6.104	34.1
		12.512	97.25	10.986	284.05
		16.174	53.8	17.09	692.75
		6.409	267.5	12.207	1140.9
		12.207	54.65	21.667	205.8
		8.85	96.35	20.447	795.35
		8.24	93.75	16.174	1142.7
		6.714	14.3	6.409	158.8
		10.071	111.6	13.123	594.8
		6.714	286.6	17.395	161.75
		11.597	123.75	9.155	929.05
		11.902	117.45	15.259	284
		26.855	252.05	18.311	250.95
		11.597	111.7	21.973	108.8
		11.597	56.65	15.869	569.95
		11.292	160.95	13.428	221.05
		12.817	96.9	24.414	660.35
		10.986	57.6	8.85	270.6
		8.24	17.05	35.4	105.95
		21.667	55.4	18.921	243.9
		9.46	55.2	14.343	1324.15
		9.46	454.15	7.629	18.2
		17.7	249.35	17.395	205
		15.869	266.35	10.681	78.1
		22.278	375.4	10.986	127.95
		18.311	147.55	12.512	716.4
		9.46	43.3	10.071	123.25
		20.752	70.1	32.043	523.25
		15.869	536.9	17.7	26.45
		21.057	137.7	7.019	507
		10.986	113.65	11.292	381.55
		11.902	27.85	9.46	163
		6.714	43.6	13.428	212.15
		10.681	154.65	13.733	25.65
		12.817	452.5	12.207	68.55
		18.005	362.2	11.902	575.3
		9.155	170.4	7.324	581.85
		18.005	31.8	7.324	90.95
		13.733	149.95	7.629	282.05
		8.545	83.2	20.142	674.95
		8.85	157.05	7.019	171
		7.019	233.05	10.376	238.1
		21.362	63.6	24.719	360.05
		16.785	96.65	20.447	117.6
		7.324	185.95	18.616	167
		27.161	335.5	21.973	554.3
		29.297	736.05	23.804	111.1
		23.193	77.3	14.648	202.7
		7.935	85.45	10.071	19.55
		12.207	156.15	17.7	106.15
		19.226	65.1	24.414	205.15
		15.869	60.8	12.817	284.2
		12.817	378.25	16.174	119.55
		10.071	55.95	10.376	712.75
		12.512	122.2	10.986	29.15
		8.85	51.55	61.34	211.5
		19.836	160.65	5.798	46.05
		16.785	208	21.667	11.65
		12.207	154.6	15.564	1644.4
		18.311	263.45	7.019	333.35
		11.292	46.4	13.123	1698.4
		18.005	553.35	9.155	774.3
		19.836	569.8	10.376	158.15
		18.311	99.75	12.512	214.25
		12.512	1082.4	14.648	251.55
		17.7	265	21.057	664.05
		12.207	1501.25	11.902	245.4
		12.817	318.5	23.499	1540.45
		22.583	325	15.259	107.2
		23.499	310.15	11.597	306.2
		23.804	280	12.512	562.35
		13.733	149.7	9.766	38.75
		16.785	197.5	10.376	51.35
		9.155	654.05	16.479	641.75
		13.733	265.35	17.395	206
		11.902	763	13.428	63.1
		11.292	814.55	14.648	9.95
		17.09	107.35	15.564	34.25
		16.479	225.6	20.142	564.15
		13.733	907.5	21.362	183.1
		14.648	62.95	10.376	72.55
		8.24	646.35	12.207	206.15
		9.766	119.1	17.7	25.2
		10.376	305.1	12.512	113.1
		11.902	216	11.902	400.95
		9.46	225.9	14.343	42.8
		12.817	107.7	25.33	648.15
		10.986	149.15	8.24	588.2
		7.935	270.15	16.479	1361.5
		18.616	97.65	17.09	992.55
		14.954	801.55	14.343	248.7
		11.597	68.85	17.395	811.85
		11.597	83.7	20.447	72.25
		22.278	27.1	9.155	377.1
		15.259	383.1	19.531	21.95
		24.719	1163.3	14.648	572.4
		14.343	33.25	17.395	282.4
		7.324	57.05	13.428	1046.25
		10.071	36.6	13.428	509.6
		12.512	186.95	22.278	581.7
		11.902	28.2	25.94	505.8
		12.512	481.8	16.785	792.45
		18.311	509.7	26.855	1028.6
		9.766	802.45	15.869	330.7
		12.817	187.4	14.343	854.4
		8.24	268.4	11.292	309.25
		12.512	91	13.733	293.85
		14.648	309.35	17.09	1167.3
		8.85	41.95	17.395	132.5
		8.545	94.45	14.648	127.85
		12.512	10.65	11.292	1055.15
		19.226	279.35	16.174	48.95
		11.292	272	14.038	319.2
		14.954	474.1	9.766	85.8
		19.531	670	8.24	96.9
		15.259	330.35	10.986	373.65
		19.226	417.25	7.019	108.7
		13.733	310.1	15.259	43.05
		17.7	107.45	11.902	456.5
		10.986	374.85	7.324	507.35
		23.193	101.6	11.902	324.6
		12.512	161.1	6.409	334.2
		10.376	28.9	19.836	930.7
		41.199	177.3	13.428	205.2
		12.207	388.6	13.123	248.85
		17.7	163.8	18.005	1042.4
		10.071	291.75	9.766	374.45
		7.324	10.8	12.817	493.95
		14.038	163.6	11.902	152.5
		13.733	124.2	29.602	689.6
		29.907	133.15	11.902	1268.15
		18.311	145.7	15.869	433.25
		17.395	49.15	11.902	422.6
		21.362	111.65	13.123	274.05
		6.104	186.7	11.902	1232.6
		9.155	222.85	14.038	343.05
		16.174	850.05	14.343	828.2
		12.512	1366.05	23.193	69.7
		13.733	82.1	18.311	1105.15
		11.292	103.35	15.564	35.55
		12.207	111.45	17.7	43.65
		9.766	549.35	9.766	243.7
		17.09	701.5	10.986	557.3
		28.992	194.4	14.343	130.65
		18.616	405.2	23.804	928.15
		17.09	106.3	23.499	335.7
		9.155	80.8	17.7	793.1
		41.199	99.75	16.479	560.65
		16.479	58.85	10.071	737.9
		15.259	219	12.817	1176.5
		9.766	127.9	18.311	587.5
		21.667	399.95	19.226	439
		10.376	225.05	13.428	18.1
		14.648	655.2	11.597	225
		20.142	221.7	12.207	964.6
		17.395	29	21.973	428.25
		24.719	645.9	24.414	89.4
		17.395	157.85	15.259	340.05
		26.245	269.35	14.343	424.65
		25.33	330.25	11.292	52.3
		18.616	3306.9	18.616	421.1
		10.376	666.55	14.648	324.95
		14.343	375.35	12.512	200.3
		23.193	438.5	12.512	196.15
		16.479	192.75	23.804	234
		12.207	394.7	14.648	183.85
		14.343	383.55	13.123	213.85
		46.082	327.65	14.343	371.75
		13.733	582.5	8.24	169.9
		33.264	174.55	9.46	1149.4
		14.954	95.95	10.071	94.55
		23.499	278.15	14.038	173
		13.733	89.65	24.719	409.6
		11.292	484.2	18.921	160.3
		10.376	75.95	17.09	55.8
		8.85	420.55	17.7	110
		10.071	973.5	14.648	94.55
		14.954	480.3	21.057	123.95
		11.292	170.35	9.155	866
		11.597	199.65	21.667	123.65
		19.531	171.3	8.545	86
		13.428	53.75	26.245	67.85
		57.373	211.2	21.362	139.4
		10.376	59.7	11.597	1475.2
		18.921	307.3	10.071	196.65
		14.343	216.4	17.395	707.55
		21.057	420.6	20.447	173.6
		29.297	259.4	19.226	89.95
		10.376	104.35	28.687	528
		17.09	177.75	11.597	274.15
		25.33	617.9	10.071	53.95
		9.46	65.25	10.376	357.1
		21.362	242.55	12.512	322.35
		14.954	91.05	20.752	262.5
		8.85	124.6	25.33	185
		11.597	83.7	21.667	63.2
		9.46	26.2	8.545	1295.35
		10.376	257.9	9.46	49.7
		10.071	574.1	23.499	266.7
		14.343	32.25	15.869	31.55
		9.46	278.35	21.362	220.25
		12.207	42.05	9.46	473.75
		9.46	47.95	13.733	212.65
		15.564	134.3	16.785	219.7
		12.512	1294.4	9.46	35.95
		10.986	395.6	8.85	276.85
		11.597	300.35	16.174	27.05
		10.681	112.75	19.836	595.7
		8.545	211.45	9.46	568.95
		12.512	111.35	13.123	99.25
		15.564	536.15	18.005	150.8
		19.531	416.7	15.564	43
		10.376	90.45	10.071	150.05
		14.954	238.35	12.817	480.95
		11.902	139.05	16.479	99.85
		22.888	164.05	12.512	47.85
		13.123	1922.7	8.24	11.6
		31.738	814.95	11.902	457.1
		21.362	315.2	9.46	169.85
		17.09	125.45	23.193	393.95
		13.733	361.8	12.817	241.2
		14.343	416.75	7.935	63.2
		10.681	576.7	13.123	733.45
		18.616	92	17.7	223.95
		22.583	786.8	12.817	504.9
		18.921	775.35	14.343	1063.45
		20.752	863.2	7.935	163.6
		10.681	1023.2	21.667	903.7
		16.174	358.8	17.7	155.2
		40.894	840.55	18.311	108.9
		8.545	578.25	16.479	488.65
		9.155	147.8	11.597	468.4
		11.292	58.9	17.7	301.55
		7.019	87.2	12.817	248.35
		10.986	136.95	9.155	150.7
		10.376	70.85	21.057	122.75
		15.259	490	18.005	239.8
		13.123	428.95	10.071	13.55
		8.24	42.25	10.986	1250.5
		7.324	95.15	13.123	238.55
		11.902	21.4	9.766	1383.8
		8.24	21.75	13.428	620.7
		8.545	52.75	10.986	414.55
		15.564	270.4	11.597	617.6
		21.667	63.15	18.616	1452.35
		6.409	44.5	15.869	287.5
		6.714	51.9	21.973	52.7
		21.057	270.5	12.512	598.5
		9.155	141.9	21.973	502.9
		22.888	386.45	26.855	20.8
		15.259	156.95	11.292	592.55
		19.226	125.05	31.738	494.35
		8.24	165	17.7	236.5
		7.629	144.15	10.986	92.45
		11.902	237.6	12.207	34.85
		17.09	201.6	11.292	1839.85
		6.714	35.35	9.155	255.15
		13.123	19.2	9.766	1124.5
		6.409	222.65	22.888	64.4
		9.46	40.75	13.733	475.8
		13.428	140.8	13.428	257.5
		14.038	234.1	17.7	575.1
		7.019	155.05	4.578	239.45
		9.766	287.75	19.836	73
		9.766	15.2	10.681	70.5
		14.038	71.65	7.324	233.45
		9.46	135.75	20.142	252
		10.071	95.65	19.531	332.8
		10.986	81.4	18.311	449.15
		7.324	28.35	7.629	251.2
		12.817	63.7	12.512	13.65
		9.155	225.7	7.324	169.2
		14.648	21.4	16.785	701.8
		10.376	203.5	6.104	45.25
		13.733	203.6	9.155	168.85
		13.733	59.25	9.46	13.25
		9.155	107.75	13.733	70.15
		8.545	141.05	7.935	291.95
		24.414	65.1	15.259	77.2
		23.193	25.65	15.259	551.45
		21.973	40.8	10.376	7.9
		16.174	46.2	10.986	126.05
		12.207	116.5	8.85	385.8
		10.681	257.1	10.071	0.05
		17.7	81.5	10.071	491.15
		6.104	51.6	8.545	112.4
		15.869	99.9	10.376	400
		8.85	71.35	8.545	527.35
		15.564	41.4	7.324	22.15
		10.376	91.3	8.85	120.4
		10.681	69.65	16.479	71.7
		7.935	64.95	14.038	99.2
		27.161	102.9	20.447	339.55
		9.155	124.15	9.766	70.9
		7.935	145.2	9.155	73.85
		10.071	78.85	8.85	24.55
		8.24	230.55	19.531	157.7
		15.259	25.1	12.512	80.9
		17.09	36.85	14.038	59.35
		8.545	9.1	11.597	151.8
		18.005	55.25	8.85	110.75
		24.109	204	13.733	98.45
		13.733	14.55	16.174	114.15
		23.804	169.95	7.019	295.15
		10.681	130.55	12.512	46.95
		18.311	38.25	16.174	164.45
		17.7	104.6	8.24	31.65
		21.057	48.6	11.292	94.15
		11.597	101.75	18.311	476.75
		8.24	42.4	8.545	257.2
		18.311	176.8	7.324	215.25
		21.667	256.6	9.766	166.6
		8.85	199.45	21.362	326.55
		11.597	39.8	8.85	52
		19.531	151.15	14.648	91.4
		18.921	156.75	24.719	416.9
		7.935	70.45	6.409	69.45
		14.954	241.95	10.986	8.95
		18.311	13.15	10.681	60.6
		25.94	57.55	11.902	25.6
		7.629	128.3	8.85	213.25
		12.817	17.7	13.733	76.35
		10.376	32	15.259	35.25
		10.376	120.8	13.123	328.8
		11.902	173.35	10.376	93.4
		37.537	126.7	10.681	164.4
		17.395	40.6	14.343	76.65
		20.142	567.9	6.104	75.25
		10.681	218.3	8.545	154.8
		30.212	597.85	11.597	158
		16.479	37	13.123	58.95
		10.986	95	7.935	213.55
		17.7	74.8	16.174	23.75
		17.395	40.25	9.766	83.2
		7.935	91.4	13.428	105.75
		19.836	107.25	8.24	64.2
		6.409	74.85	10.986	162
		9.46	9.8	32.654	174.6
		18.005	92.25	14.343	31.5
		6.714	82.7	8.85	56
		13.733	58.4	20.752	213.8
		12.817	56.35	11.292	96.1
		9.766	93.1	12.207	630.1
		11.902	76.65	20.752	101.6
		17.7	188.5	8.24	94.4
		19.836	22	22.278	58.8
		11.292	123.7	8.545	32.45
		9.766	450.1	17.09	282.65
		12.512	352	8.545	103.25
		9.155	24.35	25.024	23.85
		17.395	62	13.428	23.4
		17.09	86.6	10.986	351.85
		12.512	14.5	17.395	412.6
		13.123	20.55	6.104	138.4
		22.583	35.75	8.85	15.35
		23.499	104.5	18.311	229.7
		18.616	80.25	7.629	69.4
		26.55	114.8	9.766	54
		6.409	13.5	23.804	401.05
		14.954	55.45	8.24	20.15
		18.921	9.1	10.071	37.6
		14.648	44.5	11.292	82.7
		10.681	21.6	20.752	249.8
		9.766	80.1	10.681	91
		17.09	94.75	10.681	62.1
		7.935	163.35	6.104	479.5
		9.766	85.9	10.681	118.2
		21.973	95.05	22.278	324.45
		30.518	35.15	28.381	250.3
		10.071	91.6	10.681	278.4
		22.583	190.45	28.381	53.2
		17.09	79.5	8.85	13.1
		10.376	56.25	10.376	513.85
		16.174	125.6	14.954	66
		22.888	53.85	20.752	104.3
		7.324	99.8	10.681	257.4
		12.207	166.75	8.85	61.2
		8.85	128.3	12.817	85.9
		25.024	122.4	10.986	75.8
		10.071	35.7	14.954	175.3
		8.85	217.4	17.395	123.05
		7.629	68.75	18.921	171.6
		14.648	72.65	25.635	59.7
		11.292	84.25	13.733	71.65
		8.85	35.7	10.681	188.85
		9.46	81.1	8.24	166.55
		11.597	707.65	22.583	207.9
		8.85	184.25	17.7	76.65
		13.428	26.25	13.733	82.9
		10.376	26.9	10.071	335.9
		24.414	24.15	14.038	62.25
		8.85	41.2	7.324	28.85
		11.292	81.7	14.954	139.25
		11.597	229.55	14.038	77
		17.09	76.1	18.005	178.6
		7.019	79	14.038	5.4
		15.564	34.4	19.836	85.9
		45.166	301.05	14.954	235.75
		16.174	77.45	12.512	351.2
		10.681	100.45	10.376	257
		29.297	252.3	44.556	316.6
		18.921	32.5	7.935	105.6
		8.85	664.7	7.324	287.45
		12.817	28.8	7.019	242.9
		20.447	57.2	14.648	37.9
		14.648	55.75	14.038	96.8
		11.597	64.75	11.292	206.95
		13.123	48.45	7.324	145.45
		8.85	214.1	15.869	21.4
		8.24	50.9	10.986	304.75
		14.954	53.7	26.855	131.9
		10.071	164.85	11.597	178.7
		14.648	18.3	27.771	149.65
		11.902	160.65	17.395	231.3
		15.564	51.4	13.733	33.8
		19.531	119.3	11.597	124.95
		10.376	83.1	35.4	92.15
		16.479	34.75	15.869	45.15
		16.479	34.7	14.648	76.8
		14.343	218.9	6.409	14.5
		8.24	90.1	10.681	118
		13.733	207.2	11.597	27.85
		10.986	140.6	28.076	27.25
		10.376	58.35	16.174	21.25
		20.752	99.7	19.836	301.25
		16.174	76.75	13.733	151.55
		7.935	187.05	24.109	93.25
		9.766	88.2	18.005	30.15
		10.681	36.2	13.123	42.75
		12.817	513.8	12.512	54.1
		16.479	151.95	10.071	110.7
		11.292	133.25	10.071	82.8
		9.766	21.85	10.376	138.25
		8.545	27.45	7.324	70.7
		29.907	81.7	12.817	6.1
		8.24	65.85	26.55	260.4
		7.324	21.5	12.512	162.05
		11.902	13.95	16.174	62.95
		23.804	116.15	9.46	24.1
		10.071	171.45	6.714	163.75
		16.174	149.3	10.071	133.9
		24.719	67.9	6.104	83.65
		16.785	137.6	18.005	58.25
		5.493	124.55	11.902	122.35
		8.545	34.35	12.512	126.35
		10.071	69.8	8.24	49.35
		18.005	36.2	9.766	207.25
		8.545	95.35	15.564	346
		15.869	37.35	13.733	114.95
		28.076	26.15	10.986	152.55
		8.85	31.6	8.545	41.45
		13.428	68.1	13.428	624.5
		10.986	83.1	17.395	84
		13.428	18.2	10.071	132.8
		8.24	166.6	10.986	32.4
		10.071	51.6	22.583	84.8
		9.46	89.75	19.836	154.55
		15.259	25.85	12.512	81.85
		16.479	30.7	8.545	377.85
		25.33	71.6	16.174	97.1
		11.597	63.85	9.766	26.5
		24.719	26.4	10.071	256.2
		8.85	14.85	9.766	1524.1
		8.24	981.75	17.7	58.75
		7.324	84.8	9.46	493.75
		6.409	238.45	20.447	409.5
		10.071	58.35	16.479	1006.45
		15.564	554.8	10.376	27.75
		11.597	11	11.902	457.4
		6.409	252.35	15.259	565.2
		12.817	144.85	14.954	465.45
		9.155	68.55	15.564	2627.6
		10.376	393.2	7.935	429.15
		9.46	804.55	11.597	493.7
		19.226	77.55	13.428	379.1
		7.019	147	10.071	207.55
		17.09	67.3	12.207	1396.1
		10.681	31.25	19.531	756.15
		10.376	193.85	18.616	3705.25
		14.648	9.95	15.259	361.25
		15.564	208.2	11.292	212.15
		12.512	116.6	13.428	610
		30.212	197.6	18.311	456.35
		7.324	59.15	10.376	1631.65
		13.123	55.35	28.381	206.2
		8.85	337.65	9.155	536.8
		25.024	162	10.071	767.75
		28.687	53.3	8.85	169.75
		22.583	42.15	11.902	648.05
		9.46	313.45	17.09	118.8
		25.94	62.35	13.733	453.35
		22.278	93.95	10.376	388.55
		19.226	118.25	7.629	913.95
		25.024	315.55	16.174	126.95
		10.376	85.7	14.343	222.8
		16.174	196.7	7.629	248.25
		7.629	129.6	15.869	658.3
		12.207	172.55	9.766	379.55
		9.155	95.85	10.071	633.55
		30.823	14.45	14.038	32.5
		9.155	70.85	9.155	567.4
		8.24	367.1	18.005	107.45
		12.207	117.3	10.986	518
		9.766	243.5	16.785	448.7
		10.986	102	8.545	266.15
		7.935	112.25	9.766	1983.6
		13.123	34.95	8.24	259.9
		12.207	13.9	13.733	883
		7.324	469.45	8.85	243.1
		33.264	88.75	21.362	106.55
		25.635	127.95	7.019	481.3
		17.09	229.3	14.648	48.95
		10.376	22.25	11.292	485.45
		12.512	109.6	11.597	147.8
		11.902	32.65	12.207	699.25
		12.207	10.1	7.019	737.8
		26.855	189.7	15.869	602.45
		17.09	490.9	10.986	684.05
		27.466	65.75	14.954	107.65
		10.071	245.25	13.123	268.15
		8.24	34.55	8.24	270.45
		11.597	30.3	12.207	198.4
		14.954	62.6	5.798	596.15
		10.376	11.05	9.766	116.1
		10.071	53.45	24.109	55.3
		10.681	43.5	6.714	775.55
		20.447	236	23.804	2531.8
		23.193	373.95	7.935	1878.7
		14.343	192.4	9.766	49.4
		29.602	89.05	7.324	26.4
		20.142	100.2	12.207	376.55
		12.207	133.15	12.512	764.75
		18.921	69	15.259	819.75
		6.104	187.95	10.681	179.1
		8.24	15.4	7.019	238.75
		24.719	76.9	20.447	28.5
		10.986	44.1	10.681	1057.45
		21.057	150.7	12.207	98
		10.986	778.75	9.766	62.35
		8.24	252.75	10.681	22.9
		9.46	132	13.733	575.5
		9.155	163.1	12.817	550.6
		22.278	193.55	19.836	42.25
		18.616	623.25	11.597	52.1
		8.545	203.25	15.564	119.1
		27.771	186.25	8.85	206.75
		7.629	51.7	9.766	17.8
		16.174	206.85	11.902	1803.9
		14.648	104.8	17.395	322.75
		20.142	59.8	10.376	178.1
		20.752	23.55	12.817	83
		13.428	85.95	13.733	686.8
		10.986	66.95	9.155	312.6
		17.7	19.6	8.85	389.25
		12.817	165.2	8.545	403.8
		13.733	79.25	12.207	434.3
		10.071	181.1	11.292	306.85
		19.836	102	11.292	161.6
		6.409	44.95	19.531	1622.85
		27.161	151.05	19.226	362.25
		10.071	138.25	27.161	630.8
		12.207	31.3	8.85	117.2
		24.109	155.5	12.207	456.25
		15.259	38.6	14.343	154
		7.019	28.85	8.545	474.4
		6.714	49.1	7.629	382.15
		8.24	128.4	7.935	85.75
		8.24	29.95	12.207	66.2
		6.104	94.55	7.935	340.9
		11.902	120.85	15.259	162.25
		13.428	70.8	10.071	77.4
		13.733	366.9	11.902	101.85
		18.005	226.5	15.564	346.8
		23.499	129.6	7.629	507
		7.935	112.75	11.902	391.2
		16.479	81.95	7.324	66.1
		10.681	51.05	6.104	344.15
		9.155	84.95	11.902	491.95
		23.804	73.3	11.292	32.55
		27.161	23.2	19.226	138.4
		10.986	126.7	8.85	180.65
		10.986	86.5	13.123	236.8
		15.564	62.25	8.24	988.35
		9.155	71.15	7.324	441.8
		9.155	55.25	17.395	613
		10.681	141.75	9.46	59.65
		21.057	41.05	11.597	1143.7
		14.038	256.4	9.766	166.15
		9.155	41.15	18.921	228.15
		10.071	31.95	15.259	133.6
		18.921	109.7	12.512	632.4
		17.395	142.9	9.155	434.6
		11.902	21.65	11.902	215.35
		12.512	225.5	21.057	787.65
		13.123	48.5	17.09	48.15
		18.005	289.9	17.09	1092.8
		59.814	78.2	24.719	227.85
		14.038	110.05	10.376	500.35
		12.512	32.55	13.733	1130.95
		13.733	134.25	7.324	249.9
		31.738	55.35	17.09	499.15
		36.011	61.15	14.038	442.7
		10.986	77.25	9.766	226.25
		14.343	213	10.376	49.3
		17.7	85.6	12.512	213.6
		10.376	114	21.057	363.9
		19.836	58.7	14.038	123.85
		15.259	300.65	9.766	421.3
		10.681	9.5	12.512	275.1
		10.376	192.9	14.038	317.6
		22.583	103.1	7.629	35.45
		7.629	292.95	12.817	105.25
		7.935	119.3	21.362	310.25
		6.714	99.1	14.038	517.4
		7.935	213.45	11.597	263.8
		10.681	95.1	12.512	479.2
		7.629	885.85	12.817	480.1
		13.123	103.05	26.55	1249.7
		10.071	17.55	11.597	466.9
		9.766	309.15	22.888	405.4
		11.597	226.2	8.545	1400.8
		7.935	399.75	6.409	848.45
		18.921	41.8	12.207	30.2
		10.681	346.65	9.155	657.85
		10.071	48.75	10.071	147.65
		12.817	23.45	8.545	389.4
		12.207	34.45	9.46	100.2
		12.817	268.2	15.564	800.3
		9.766	202.05	19.836	311.05
		8.85	40.25	12.207	65.35
		14.954	75.8	7.324	470.45
		11.597	147.55	19.836	167.15
		13.733	128.55	25.33	203.5
		18.616	444.1	7.324	223.2
		17.09	13.05	9.766	348.3
		32.959	75	12.817	24.5
		10.681	161.5	9.46	38.25
		16.174	112.75	9.155	95.5
		12.207	23.5	24.109	678.5
		10.071	188.4	8.545	112.6
		12.817	62.2	17.395	936.4
		11.292	8.1	10.376	331.6
		7.324	248.1	7.935	109.15
		14.954	134.85	14.038	261.85
		37.842	846.65	23.804	415
		14.038	122.95	8.545	520.8
		15.259	49.1	10.986	740.25
		8.545	29.9	8.85	72.5
		20.447	81.45	19.226	222.05
		10.986	150.65	9.766	341.15
		17.395	63.75	14.343	224.45
				8.24	41.9
				9.766	240.75
				12.817	1899.45
				8.85	12.85
				9.155	178.5
				11.597	118.9
				10.986	38.4
				31.128	1176
				13.123	93.05
				7.019	163.65
				12.207	341.25
				9.766	1115.2
				16.479	147.9
				9.46	263.65
				9.155	453.9
				18.311	740.95
				15.259	36.8
				18.616	225.35
				7.019	1083.7
				14.038	11.6
				12.207	139.8
				24.109	125.4
				10.986	76.3
				9.46	513.15
				15.564	152.65
				11.597	346.15
				20.752	364.3
				15.564	432.85
				14.343	241.35
				19.226	1396.9
				12.207	97.6
				6.409	285.5
				8.85	755.55
				11.292	134.8
				7.324	155.25
				14.343	100.2
				11.292	741.15
				17.395	707.4
				8.24	263.6
				8.85	253.9
				22.278	505.15
				10.681	65.6
				12.817	319.4
				18.311	624.55
				10.071	1176.6
				11.292	157.25
				13.428	491.25
				10.376	638.25
				8.545	371.25
				11.597	87.6
				8.85	121.05
				11.902	374.5
				21.362	271.55
				26.55	309.85
				10.681	886.9
				13.123	237.35
				7.935	226.8
				7.324	354.25
				19.836	441.2
				10.376	833.3
				7.019	399.45
				13.733	179.85
				15.259	77.6
				11.902	1046.15
				7.324	263.55
				11.902	565.8
				15.259	105.2
				7.935	303.65
				9.766	135.7
				13.428	363.1
				9.46	258.95
				13.123	147.8
				6.409	178.95
				7.324	283.95
				11.597	134.6
				8.85	112.05
				8.85	56.6
				15.869	422.9
				6.714	122.55
				12.512	111.25
				11.597	376.7
				9.766	71
				13.123	1179.85
				10.681	580.95
				21.362	323.15
				9.766	267.45
				7.324	23.85
				7.629	56.2
				12.512	383.55
				8.545	210.1
				23.193	496.55
				10.681	208.95
				7.324	63.85
				11.597	142.65
				16.479	2533.5
				9.155	997.85
				6.714	60.15
				10.071	59.1
				10.376	209.8
				21.973	165.45
				16.479	167.55
				16.174	259.5
				6.714	131.7
				8.24	397.65
				9.46	1006.1
				22.583	389.25
				15.259	53.7
				9.766	139.3
				12.817	743.7
				18.616	223
				11.902	231.55
				14.343	837.95
				16.174	323.7
				15.259	397.1
				10.986	114.5
				16.785	23.4
				8.24	123.45
				9.155	450.2
				15.869	957.95
				16.479	108.25
				12.512	208.95
				10.986	117.35
				10.071	475.2
				14.648	298.8
				13.123	440
				7.324	583.6
				15.564	94.85
				14.038	505.3
				11.597	21.6
				11.292	73.05
				7.019	528.2
				16.785	670.45
				10.071	1552.15
				12.207	134.5
				11.292	162.25
				10.071	455.9
				8.545	633.95
				10.986	450.4
				21.667	182.6
				7.629	218.2
				9.155	1021.85
				9.155	1291.05
				8.85	215.45
				11.597	130.75
				11.902	112.05
				10.071	140.5
				16.174	573.5
				14.648	452
				6.409	33.45
				13.733	886.75
				22.583	580.15
				14.343	447.1
				11.597	288.8
				12.817	188.85
				9.46	931.05
				16.785	1024.85
				9.155	458.55
				7.629	724.55
				21.362	1418.4
				10.986	80.1
				7.629	188.75
				8.24	335
				19.226	127.4
				8.85	298.85
				21.057	155.75
				9.46	493.55
				7.935	141.15
				14.954	689.45
				9.155	123.85
				17.09	216.05
				13.733	173.5
				24.414	56.1
				14.038	313.85
				11.902	371.3
				12.207	951.45
				14.343	326.9
				15.564	859.5
				5.798	1002.55
				9.766	124.65
				9.766	884.05
				10.071	329.2
				25.635	655.6
				15.869	142.35
				7.629	528.4
				12.207	260.9
				14.343	470.85
				9.155	101.8
				12.207	659.65
				8.24	314.95
				11.292	222.95
				13.733	469.45
				17.09	1316.6
				14.954	857.2
				7.935	1451.4
				18.005	476.65
				9.766	838.35
				18.005	338.3
				11.292	312.5
				14.648	1817.05
				14.648	42.65
				12.512	197.55
				11.902	440.9
				9.155	215.65
				21.667	77.8
				12.207	301.6
				8.85	409.8
				11.597	537.6
				9.46	133.65
				16.479	315.8
				8.85	85.5
				6.714	154.6
				13.428	109.85
				8.545	247.3
				9.155	382.45
				12.512	532.1
				17.395	302.3
				14.954	497.6
				10.376	2808.5
				12.207	437.1
				15.564	1549.6
				24.109	350.95
				10.986	1750.95
				20.142	710.9
				11.597	1573.55
				18.311	1053.25
				10.681	357.25
				19.226	585.7
				11.902	826.9
				13.733	1018.4
				14.954	1305.2
				28.687	1364.75
				10.986	1099.85
				11.902	112.8
				20.752	1934.95
				8.85	1698.5
				12.817	530.45
				17.7	458.75
				14.343	675.7
				13.123	43.65
				13.123	65.55
				24.109	2388.2
				8.85	532.7
				15.869	330.2
				15.259	408.05
				13.428	1244.15
				13.428	112.15
				14.038	115.2
				13.733	907.05
				12.207	497.8
				7.324	866.1
				21.362	263.55
				12.817	3063.95
				25.635	408.35
				11.597	2090.85
				11.292	323.1
				16.479	1769.55
				8.24	890.7
				10.986	1161.2
				15.564	629.95
				9.46	356.95
				10.071	1644.95
				7.629	869.6
				11.597	1112.55
				8.24	199.9
				9.46	1445.25
				7.935	403.5
				13.123	2785.8
				12.207	653.3
				11.902	1533.6
				10.681	635.75
				13.733	2429.2
				7.324	815.7
				11.902	867.15
				20.752	678.2
				14.954	1460.65
				8.545	312.75
				16.479	947.25
				28.992	598
				26.245	417.55
				12.512	1938.9
				9.155	189.65
				9.766	806.9
				17.395	265.05
				10.681	870.85
				10.681	563.55
				9.155	512.2
				7.324	824.9
				9.155	302.95
				11.597	805.7
				12.207	493.75
				14.343	1289.3
				10.986	807.6
				10.681	869
				14.954	3406.05
				16.785	223.6
				14.648	480.4
				7.629	198.1
				11.902	435.55
				9.155	649.05
				8.85	1181.8
				11.292	78.1
				11.902	475.15
				12.817	1123.1
				7.935	198.05
				7.629	1664.2
				30.518	494.5
				10.376	1584.55
				11.597	1018.35
				10.681	1108.3
				31.433	27.65
				9.155	49.15
				9.155	179.95
				10.376	106.2
				12.817	280.2
				8.24	589.85
				7.629	807.8
				9.46	260.15
				12.817	303.35
				7.629	240.45
				13.428	1377.95
				26.855	1375.3
				13.733	1221.1
				9.46	273.8
				7.019	124.5
				21.667	235.35
				7.019	1173.1
				10.376	843.95
				10.071	2655.15
				35.706	2450.5
				17.09	166.2
				15.259	1461.4
				9.766	1241.1
				11.597	914.2
				14.648	268.7
				29.907	1166.5
				11.902	2038.7
				5.493	802.4
				13.428	406.8
				13.428	482
				12.817	468.7
				12.817	380.2
				14.343	1157.7
				9.155	3595.4
				7.324	1165.1
				18.921	58
				13.123	818.7
				10.681	597.9
				9.46	28
				9.46	838.8
				6.714	757.1
				12.207	52.1
				13.733	506.8
				6.104	1197
				10.986	2838.1
				10.376	58.4
				15.259	276.5
				20.447	198.7
				5.188	178.9
				13.123	4082.3
				14.648	285
				10.071	1991.2
				9.155	165.5
				10.986	219.8
				8.85	3308.7
				7.935	758
				8.24	1114
				8.545	2306.8
				8.24	1464.5
				14.343	2926
				12.817	386.7
				13.428	2346.3
				9.155	25.1
				9.766	1554.4
				9.766	1554.9
				10.681	3800.8
				22.583	25.5
				12.512	283
				19.836	929.2
				10.986	597.1
				7.324	117
				11.292	590.1
				8.545	172.8
				8.24	221.1
				6.714	117.2
				11.292	1664.3
				15.564	228.7
				13.428	634
				13.123	635.8
				6.409	3144
				7.629	163.5
				6.714	38.4
				7.019	568.3
				10.986	475.7
				15.564	1809.6
				10.071	2325
				14.343	549
				15.259	1100.2
				12.207	331.3
				7.324	157.1
				17.7	38.9
				13.123	1129.9
				14.038	685.7
				19.226	1183.3
				7.935	600.7
				11.902	236.1
				9.766	1124
				8.24	336
[truncated: 213 more rows]

## Sheet: Figure 6-supplement figure 1a
Figure 6-supplement figure 1a
		D1-MSNs, mean values per cell
		veh					NAC
		Ri (MOhm)	Cm (pF)	Vrmp (mV)	Vthres (mV)	Rheobase (pA)	Ri (MOhm)	Cm (pF)	Vrmp (mV)	Vthres (mV)	Rheobase (pA)
		79.1429	143.987	-80.0762	-43.5	181	112.156	99.0987	-77.1755	-41.5	135
		112.946	125.058	-79.8863	-46.3	97.7	103.003	96.5311	-64.5792	-41.4	192
		80.9195	103.81	-79.1093	-45.3	119	68.2025	121.927	-78.9685	-40.3	249
		62.9738	86.302	-78.2603	-31.6	253	82.6897	132.12	-78.9518	-43.4	191
		213.47	74.6413	-83.0924	-47.6	58.3	59.328	90.3235	-80.1777	-45	259
		153.128	120.51	-71.4145	-42.5	45.5	78.4042	99.3964	-79.7977	-43.8	163
		95.7436	125.627	-80.4843	-47.4	136	105.084	129.396	-83.6681	-49	120
		77.6736	103.064	-80.2745	-46.8	177	95.0093	92.4453	-80.2011	-46	100
		165.183	80.7365	-79.9328	-38.6	117	120.998	122.91	-77.3396	-44.3	127
		78.7505	128.369	-81.4931	-48	171	123.343	66.0725	-79.9059	-47.4	114
		206.201	63.2932	-69.4102	-42.9	87	383.558	85.1379	-79.1109	-47.7	38.8
		106.491	98.9033	-78.7929	-43.4	147	181.364	76.3526	-77.4681	-41.5	97
		107.313	93.7584	-81.4824	-41.8	161	135.065	96.9435	-78.0957	-48.3	103
		106.579	133.267	-77.6937	-41.5	132	117.66	56.2037	-74.7923	-41	114.4
		169.142	118.18	-80.5714	-45	89.4	98.8666	89.1801	-79.802	-45.6	194
		173.413	102.696	-77.064	-42.5	88.8

## Sheet: Figure 6-supplement figure 1b
Figure 6-supplement figure 1b
		D1-MSNs, number of spikes per ramp (5 sec duration)
	ramp	veh																		NAC
	1	0	0	0	0	0	0	0	0	0	0	0	0	0	0	0	0			0	0	0	0	0	0	0	0	0	0	5	0	0	0	0
	2	0	1	0	0	23	15	0	0	0	0	6	0	0	0	4	4			0	0	0	0	0	0	0	1	0	0	23	1	0	0	0
	3	0	22	10	0	55	24	4	0	10	0	29	2	0	4	29	24			5	0	0	0	0	0	9	22	8	21	38	18	16	16	0
	4	4	41	31	0	79	26	19	6	26	5	49	14	14	16	47	41			25	2	0	2	0	9	23	43	24	52	37	34	38	42	2
	5	16	56	49	1	94	32	35	19	42	14	68	28	35	28	63	57			40	14	1	10	0	26	39	60	44	77	32	45	54	54	20
	6	25	69	69	11	108	33	51	36	49	25	83	40	52	44	76	68			56	22	10	21	7	43	52	72	64	100	28	56	67	57	40

## Sheet: Figure 6-figure supplement 1c
Figure 6-figure supplement 1c
		D2-MSNs, mean values per cell
		veh					NAC
		Ri (MOhm)	Cm (pF)	Vrmp (mV)	Vthres (mV)	Rheobase (pA)	Ri (MOhm)	Cm (pF)	Vrmp (mV)	Vthres (mV)	Rheobase (pA)
		176.274	126.824	-78.1958	-39.2	105.3	126.425	58.3044	-78.4676	-45.1	127
		102.302	68.1125	-76.29	-48	166	161.405	147.968	-75.3828	-44.8	99.8
		97.9159	91.3602	-80.2597	-49	126	96.4675	152.096	-81.4246	-49.7	161
		190.39	143.778	-79.2577	-40.9	85.8	160.6	158.019	-78.3669	-45	86
		98.6852	107.408	-76.5073	-47.8	151	137.778	96.9659	-77.3087	-44.5	94.6
		176.88	118.135	-81.1413	-44.3	99.5	99.1648	113.781	-83.9152	-52.9	96
		88.4814	82.862	-73.5301	-43.9	178	89.8248	106.986	-65.1918	-46.5	195
		184.989	117.758	-74.2991	-47.1	89	236.781	96.8049	-69.7738	-48.7	76
		190.39	143.778	-80.8476	-39.6	92.5	105.134	76.4176	-77.9709	-41.6	174
		148.815	115.272	-76.885	-46.3	99.8	144.689	89.4802	-80.16	-46.5	92.5
		139.407	109.203	-82.4008	-48.5	95.2	131.704	145.887	-79.8046	-46.7	94
							105.136	91.7364	-78.0414	-43.9	165
							109.683	111.638	-72.6515	-40.4	174
							87.1749	145.008	-78.7101	-45.5	142
							124.78	95.9184	-80.566	-45.6	130

## Sheet: Figure 6-figure supplement 1d
Figure 6-figure supplement 1d
		D2-MSNs, number of spikes per ramp (5 sec duration)
	ramp	veh													NAC
	1	0	0	0	0	0	0	0	0	0	0	0			0	0	0	0	0	0	0	0	0	0	0	0	0	0	0
	2	0	0	0	7	0	1	0	3	2	2	3			0	0	0	7	3	2	0	8	0	2	2	0	0	0	0
	3	27	0	8	29	1	29	0	18	15	21	27			8	12	0	33	28	32	0	27	0	19	16	0	0	3	13
	4	44	16	32	44	16	51	5	40	28	38	55			31	28	10	51	45	63	2	49	7	35	35	16	7	18	35
	5	57	35	53	51	36	68	17	60	40	48	74			49	46	25	67	61	80	12	61	22	47	47	36	24	31	54
	6	65	51	72	56	51	83	32	75	49	57	89			73	56	42	76	77	96	25	73	36	55	62	53	41	46	68
